# Supplementary material for: Synthesis of indoles, benzofurans, and related heterocycles via an acetylene-activated SNAr/intramolecular cyclization cascade sequence in water or DMSO
Source: Royal Society of Chemistry journal article supplement (doi:10.1039/c4ob02549k), 2015-01-01
Supplement: c4ob02549k1.pdf [file c4ob02549k1.pdf]

# Synthesis of indoles, benzofurans, and related heterocycles via an acetylene-activated S<sub>N</sub>Ar/intramolecular cyclization cascade sequence in water or DMSO

Reuben Hudson,<sup>a</sup> Nicholas P. Bizier,<sup>b</sup> Kristin N. Esdale<sup>a</sup> and Jeffrey L. Katz<sup>a\*</sup>

<sup>a</sup> Department of Chemistry, Colby College, 5754 Mayflower Hill Drive, Waterville, Maine, 04901, United States. <sup>b</sup> Division of Natural Sciences, Daemen College, 4380 Main St, Amherst, New York, 14226, United States

## Supporting Information

|                                                            |     |
|------------------------------------------------------------|-----|
| Graphical table of contents/Compound shorthand.....        | S2  |
| Experimental details/Characterization data.....            | S4  |
| 2-halo-arylacetylenes (electrophiles).....                 | S4  |
| N-tolyl indoles.....                                       | S15 |
| Benzofurans.....                                           | S24 |
| N-H indoles.....                                           | S29 |
| Hydroxide/p-tolylamide competition.....                    | S33 |
| Compound Spectra.....                                      | S34 |
| Reagent sourcing, purity and aftermarket purification..... | S86 |
| Instrument specifications.....                             | S86 |
| Supporting Information references.....                     | S86 |

## Graphical Table of Contents with Compound Shorthand

| Electrophiles <b>1 (a-r)</b>                                                                                              | Indoles <b>2 (a-q)</b>                                                                                                     | Benzofurans <b>3 (a-p)</b>                                                                                                 | indoles <b>4 (a-p)</b>                                                                                                       |
|---------------------------------------------------------------------------------------------------------------------------|----------------------------------------------------------------------------------------------------------------------------|----------------------------------------------------------------------------------------------------------------------------|------------------------------------------------------------------------------------------------------------------------------|
| 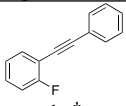<br><b>1a</b> <sup>†</sup>               | <br><b>2a</b> <sup>†b</sup>               | <br><b>3a</b> – SI page 24 <sup>‡</sup>   | <br><b>4a</b> – SI page 29 <sup>‡</sup>   |
| <br><b>1b</b> – SI page 4 <sup>‡</sup>   | <br><b>2b</b> – SI page 15 <sup>‡</sup>   |                                                                                                                            |                                                                                                                              |
| <br><b>1c</b> – SI page 4 <sup>‡</sup>   | <br><b>2c</b> – SI page 15 <sup>‡</sup>   |                                                                                                                            |                                                                                                                              |
| <br><b>1d</b> – SI page 5 <sup>‡</sup>   | <br><b>2d</b> – SI page 16 <sup>‡</sup>   |                                                                                                                            |                                                                                                                              |
| <br><b>1e</b> – SI page 5 <sup>‡</sup>  | <br><b>2e</b> – SI page 16 <sup>‡</sup>  |                                                                                                                            |                                                                                                                              |
| <br><b>1f</b> – SI page 6 <sup>‡</sup> | <br><b>2f</b> – SI page 17 <sup>‡</sup> |                                                                                                                            |                                                                                                                              |
| <br><b>1g</b> – SI page 7 <sup>‡</sup> | <br><b>2g</b> – SI page 18 <sup>‡</sup> |                                                                                                                            |                                                                                                                              |
| <br><b>1h</b> – SI page 7 <sup>‡</sup> | <br><b>2h</b> – SI page 18 <sup>‡</sup> |                                                                                                                            |                                                                                                                              |
| <br><b>1i</b> <sup>†</sup>             | <br><b>2i</b> <sup>†</sup>              | <br><b>3b</b> – SI page 24 <sup>‡</sup> | <br><b>4b</b> – SI page 29 <sup>‡</sup> |
| <br><b>1j</b> – SI page 8 <sup>‡</sup> | <br><b>2j</b> – SI page 19 <sup>‡</sup> | <br><b>3d</b> – SI page 25 <sup>‡</sup> | <br><b>4d</b> – SI page 30 <sup>‡</sup> |

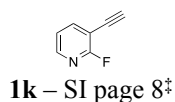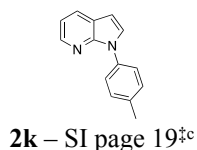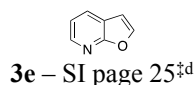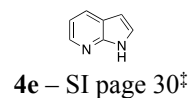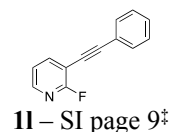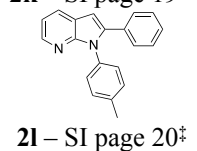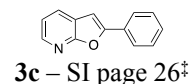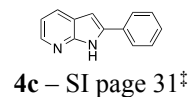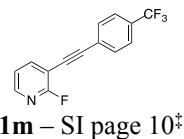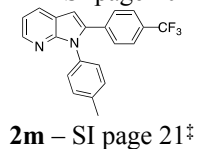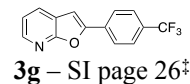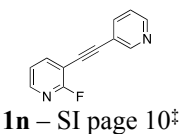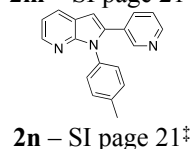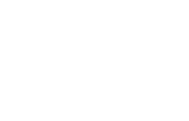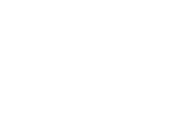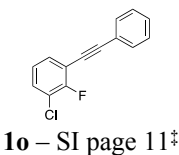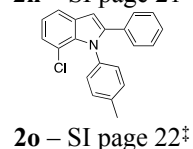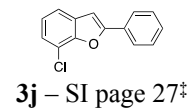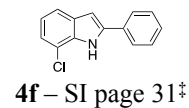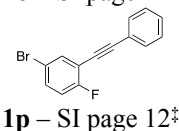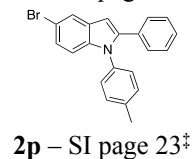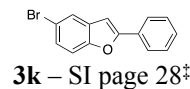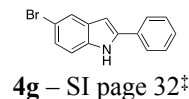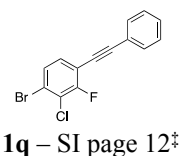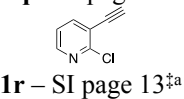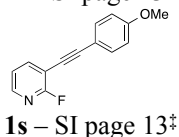

<sup>†</sup> synthesis and characterization data available in SI reference 1.

<sup>‡</sup> synthesis information and full characterization data (IR, TLC, HRMS, <sup>1</sup>H and <sup>13</sup>C NMR) available herein.

<sup>a</sup> <sup>1</sup>H NMR available for terminal-alkyne deuterated product (**1r-D**) on page 82.

<sup>b</sup> <sup>1</sup>H NMR available for C2-deuterated product (**2a-D**) on page 83.

<sup>c</sup> <sup>1</sup>H NMR available for C1,C2-deuterated product (**2k-D<sub>2</sub>**) on page 84.

<sup>d</sup> <sup>1</sup>H NMR available for C1,C2-deuterated product (**3e-D<sub>2</sub>**) on page 85.

## Synthesis of 2-halo-arylacetylenes (1a-q)

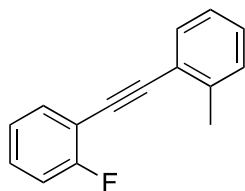

**1b**

In a sealed tube were added  $\text{PdCl}_2(\text{PPh}_3)_2$  (88 mg, 0.13 mmol) and  $\text{CuI}$  (48 mg, 0.25 mmol). The mixture was purged with Argon for 5 minutes, and then degassed 2-fluoro-1-iodobenzene (1.0 mL, 8.75 mmol), degassed 2-ethynyltoluene (1.2 mL, 9.54 mmol), and triethylamine (12 mL) were added in that order. The mixture was stirred at room temperature for 18 hours and then diluted with  $\text{CH}_2\text{Cl}_2$  and aqueous  $\text{NH}_4\text{Cl}$ . The layers were separated and the aqueous phase extracted with  $\text{CH}_2\text{Cl}_2$  (3 X 80 mL). The combined organic layers were washed with  $\text{H}_2\text{O}$  (80 mL) and dried over  $\text{Na}_2\text{SO}_4$ . The solvent was removed under reduced pressure to give a brown oil. Purification by silica gel flash column chromatography (hexanes) gave 1.56 grams (7.43 mmol, 85 % yield) of product as a colorless oil.  $^1\text{H}$  NMR (500 MHz,  $\text{CDCl}_3$ ):  $\delta$  7.58-7.53 (td,  $J = 7.8$  Hz, 1.9 Hz, 1H), 7.52-7.48 (d,  $J = 7.9$  Hz, 2H), 7.36-7.30 (m, 1H), 7.21-7.19 (d,  $J = 7.8$  Hz, 2H), 7.17-7.11 (q, 7.8 Hz, 2H), 2.41 (s, 3H).  $^{13}\text{C}$  NMR (126 MHz,  $\text{CDCl}_3$ ):  $\delta$  163.6, 161.6, 138.8, 131.6, 129.7, 129.6, 129.1, 123.9 (d,  $J = 3.8$  Hz), 119.8, 115.6, 115.4, 94.6 (d,  $J = 3.3$  Hz), 82.0, 21.5. TLC:  $R_f = 0.5$  (hexanes). IR (ATR): 3031 (m), 2920 (m), 2216 (m), 1931 (m), 1800 (w), 1700 (m), 1600 (w), 1569 (m), 1486 (s), 1319 (w), 1271 (m), 1265 (s), 1221 (s). HRMS (DART): calculated for  $[\text{C}_{15}\text{H}_{11}\text{FH}]^+$  211.0918, measured 211.0921.  $^1\text{H}$  and  $^{13}\text{C}$  NMR spectra available on SI page 34.

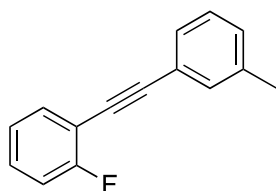

**1c**

In a sealed tube were added  $\text{PdCl}_2(\text{PPh}_3)_2$  (88 mg, 0.13 mmol) and  $\text{CuI}$  (48 mg, 0.25 mmol). The mixture was purged with Argon for 5 minutes, and then degassed 2-fluoro-1-iodobenzene (1.0 mL, 8.75 mmol), degassed 3-ethynyltoluene (1.1 mL, 8.99 mmol), and triethylamine (12 mL) were added in that order. The mixture was stirred at room temperature for 18 hours and then diluted with  $\text{CH}_2\text{Cl}_2$  and aqueous  $\text{NH}_4\text{Cl}$ . The layers were separated and the aqueous phase extracted with  $\text{CH}_2\text{Cl}_2$  (3 X 80 mL). The combined organic layers were washed with  $\text{H}_2\text{O}$  (80 mL) and dried over  $\text{Na}_2\text{SO}_4$ . The solvent was removed under reduced pressure to give a brown oil. Purification by silica gel flash column chromatography (hexanes) gave 1.61 grams (7.66 mmol, 88 % yield) of product as a yellow oil.  $^1\text{H}$  NMR (500 MHz,  $\text{CDCl}_3$ ):  $\delta$  7.61-56 (td,  $J = 6.8$  Hz, 1.9 Hz, 1H), 7.48-7.43 (d,  $J = 10.3$  Hz, 2H), 7.38-7.29 (m, 2H), 7.25-7.21 (d,  $J = 7.8$  Hz, 1H), 7.20-7.13 (q,

$J = 7.3$  Hz, 2H), 7.42 (s, 3H).  $^{13}\text{C}$  NMR (126 MHz,  $\text{CDCl}_3$ ):  $\delta$  163.7, 161.7, 138.1, 133.5 (d,  $J = 1.3$  Hz), 132.3, 129.9 (d,  $J = 7.6$  Hz), 129.6, 128.6 (d,  $J = 65.5$  Hz), 124.0 (d,  $J = 3.8$  Hz), 122.8, 115.6 (d,  $J = 21.4$  Hz), 112.1 (d,  $J = 16.4$  Hz), 94.8 (d,  $J = 2.5$  Hz), 82.3, 21.2. TLC:  $R_f = 0.5$  (hexanes). IR (ATR): 3038 (s), 2921 (s), 2212 (m), 1946 (w), 1793 (w), 1698 (w), 1598 (s), 1572 (s), 1495 (s), 1481 (s), 1380 (w), 1318 (w), 1264 (m), 1226 (s), 1205 (m), 1167 (w), 1155 (w), 1131 (w), 1098 (s), 1030 (m). HRMS (DART): calculated for  $[\text{C}_{15}\text{H}_{11}\text{FH}]^+$  211.0918, measured 211.0896.  $^1\text{H}$  and  $^{13}\text{C}$  NMR spectra available on SI page 35.

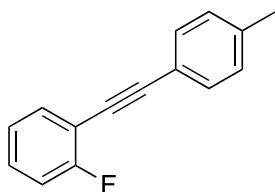

**1d**

In a sealed tube were added  $\text{PdCl}_2(\text{PPh}_3)_2$  (88 mg, 0.13 mmol) and  $\text{CuI}$  (48 mg, 0.25 mmol). The mixture was purged with Argon for 5 minutes, and then degassed 2-fluoro-1-iodobenzene (1.0 mL, 8.75 mmol), degassed 4-ethynyltoluene (1.2 mL, 9.46 mmol), and triethylamine (12 mL) were added in that order. The mixture was stirred at room temperature for 18 hours and then diluted with  $\text{CH}_2\text{Cl}_2$  and aqueous  $\text{NH}_4\text{Cl}$ . The layers were separated and the aqueous phase extracted with  $\text{CH}_2\text{Cl}_2$  (3 X 80 mL). The combined organic layers were washed with  $\text{H}_2\text{O}$  (80 mL) and dried over  $\text{Na}_2\text{SO}_4$ . The solvent was removed under reduced pressure to give a brown oil. Purification by silica gel flash column chromatography (hexanes) gave 1.65 grams (7.85 mmol, 90 % yield) of product as a white solid.  $^1\text{H}$  NMR (500 MHz,  $\text{CDCl}_3$ ):  $\delta$  7.67-7.59 (m, 3H), 7.41-7.36 (m, 1H), 7.29-7.25 (d,  $J = 8$  Hz, 2H), 7.24-7.18 (m, 2H), 2.46 (s, 3H).  $^{13}\text{C}$  NMR (126 MHz,  $\text{CDCl}_3$ ):  $\delta$  163.6, 161.8, 138.8, 133.4 (d,  $J = 1.5$  Hz), 131.6, 129.7 (d,  $J = 8.2$  Hz), 129.1, 123.9 (d,  $J = 4.0$  Hz), 119.8, 115.5 (d,  $J = 21.0$  Hz), 112.1 (d,  $J = 15.6$ ), 94.6 (d,  $J = 3.5$  Hz), 21.5. TLC:  $R_f = 0.5$  (hexanes). IR (ATR): 3027 (m), 2919 (m), 2219 (m), 1915 (m), 1805 (w), 1699 (m), 1662 (w), 1602 (w), 1566 (m), 1556 (m), 1542 (w), 1535 (w), 1509 (s), 1488 (s), 1444 (s), 1318 (w), 1276 (m), 1263 (s), 1219 (s), 1180 (m), 1139 (w), 1096 (m), 966 (w), 942 (m). HRMS (DART): calculated for  $[\text{C}_{15}\text{H}_{11}\text{FH}]^+$  211.0918, measured 211.0918.  $^1\text{H}$  and  $^{13}\text{C}$  NMR spectra available on SI page 36.

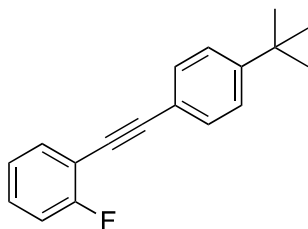

**1e**

In a sealed tube were added  $\text{PdCl}_2(\text{PPh}_3)_2$  (88 mg, 0.13 mmol) and  $\text{CuI}$  (48 mg, 0.25 mmol). The mixture was purged with Argon for 5 minutes, and then degassed 2-fluoro-1-iodobenzene (1.0 mL, 8.75 mmol), degassed 4-*tert*-butylphenylacetylene (1.6 mL, 8.87

mmol), and triethylamine (12 mL) were added in that order. The mixture was stirred at room temperature for 18 hours and then diluted with CH<sub>2</sub>Cl<sub>2</sub> and aqueous NH<sub>4</sub>Cl. The layers were separated and the aqueous phase extracted with CH<sub>2</sub>Cl<sub>2</sub> (3 X 80 mL). The combined organic layers were washed with H<sub>2</sub>O (80 mL) and dried over Na<sub>2</sub>SO<sub>4</sub>. The solvent was removed under reduced pressure to give a brown oil. Purification by silica gel flash column chromatography (hexanes) gave 1.91 grams (7.58 mmol, 87 % yield) of product as a white solid. <sup>1</sup>H NMR (500 MHz, CDCl<sub>3</sub>): δ 7.55-7.49 (m, 3H), 7.42-7.37 (d, *J* = 8.5 Hz, 2H), 7.34-7.28 (m, 1H), 7.16-7.08 (m, 2H), 1.35 (s, 9H). <sup>13</sup>C NMR (126 MHz, CDCl<sub>3</sub>): δ 163.5, 161.6, 151.9, 133.4, 131.4, 129.7 (d, *J* = 7.9 Hz), 125.4, 123.9 (d, *J* = 3.8 Hz), 120.0, 115.5 (d, *J* = 21.4 Hz), 112.2 (d, *J* = 15.8 Hz), 94.6 (d, *J* = 3.4 Hz), 34.8, 31.2. TLC: *R<sub>f</sub>* = 0.5 (hexanes). IR (ATR): 2964 (s), 2860 (m), 2221 (w), 1918 (w), 1844 (w), 1733 (w), 1716 (w), 1698 (m), 1674 (w), 1616 (w), 1555 (m), 1567 (m), 1519 (m), 1502 (m), 1485 (s), 1450 (s), 1405 (w), 1362 (m), 1263 (s), 1213 (s), 1144 (w), 1094 (s), 1015 (m). HRMS (DART): calculated for [C<sub>18</sub>H<sub>17</sub>FH]<sup>+</sup> 253.1387, measured 253.1417. <sup>1</sup>H and <sup>13</sup>C NMR spectra available on SI page 37.

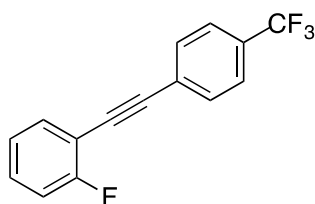

**1f**

In a sealed tube were added PdCl<sub>2</sub>(PPh<sub>3</sub>)<sub>2</sub> (89 mg, 0.13 mmol) and CuI (48 mg, 0.25 mmol). The mixture was purged with Argon for 5 minutes, and then degassed 2-fluoro-1-iodobenzene (1.0 mL, 8.75 mmol), degassed 1-ethynyl-4-(trifluoromethyl)benzene (1.5 mL, 9.19 mmol), and triethylamine (12 mL) were added in that order. The mixture was stirred at room temperature for 18 hours and then diluted with CH<sub>2</sub>Cl<sub>2</sub> and aqueous NH<sub>4</sub>Cl. The layers were separated and the aqueous phase extracted with CH<sub>2</sub>Cl<sub>2</sub> (3 X 80 mL). The combined organic layers were washed with H<sub>2</sub>O (80 mL) and dried over Na<sub>2</sub>SO<sub>4</sub>. The solvent was removed under reduced pressure to give a brown oil. Purification by silica gel flash column chromatography (hexanes) gave 1.61 grams (6.97 mmol, 80 % yield) of product as a white solid. <sup>1</sup>H NMR (500 MHz, CDCl<sub>3</sub>): δ 7.69-7.66 (d, *J* = 8.5 Hz, 2H), 7.64-7.61 (d, *J* = 8.5 Hz), 7.57-7.53 (td, *J* = 7.4 Hz, 1.8 Hz, 1H), 7.40-7.34 (m, 1H), 7.19-7.11 (m, 2H). <sup>13</sup>C NMR (126 MHz, CDCl<sub>3</sub>): δ: 163.7, 161.7, 133.5 (d, *J* = 0.9 Hz), 131.9, 130.6 (d, *J* = 7.9 Hz), 126.7, 125.3 (q, *J* = 3.8 Hz), 124.9, 124.1 (d, *J* = 3.8 Hz), 115.6 (d, *J* = 20.5 Hz), 111.2 (d, *J* = 15.8 Hz), 92.8 (d, *J* = 3.2 Hz), 85.0. TLC: *R<sub>f</sub>* = 0.5 (hexanes). IR (ATR): 3060 (w), 2928 (w), 2225 (m), 1927 (w), 1806 (w), 1698 (w), 1675 (w), 1615 (m), 1604 (s), 1555 (m), 1542 (m), 1521 (w), 1489 (s), 1449 (s), 1405 (m), 1324 (s), 1265 (s), 1223 (s), 1156 (s), 1104 (s). HRMS (DART): calculated for [C<sub>15</sub>H<sub>8</sub>F<sub>4</sub>H]<sup>+</sup> 265.0635, measured 265.0661. <sup>1</sup>H and <sup>13</sup>C NMR spectra available on SI page 38.

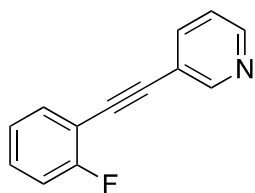

**1g**

In a sealed tube were added  $\text{PdCl}_2(\text{PPh}_3)_2$  (88 mg, 0.13 mmol), CuI (48 mg, 0.25 mmol), and 3-ethynylpyridine (928 mg, 9.00 mmol). The mixture was purged with Argon for 5 minutes, and then degassed 2-fluoro-1-iodobenzene (1.0 mL, 8.75 mmol), and triethylamine (12 mL) were added in that order. The mixture was stirred at room temperature for 18 hours and then diluted with  $\text{CH}_2\text{Cl}_2$  and aqueous  $\text{NH}_4\text{Cl}$ . The layers were separated and the aqueous phase extracted with  $\text{CH}_2\text{Cl}_2$  (3 X 80 mL). The combined organic layers were washed with  $\text{H}_2\text{O}$  (80 mL) and dried over  $\text{Na}_2\text{SO}_4$ . The solvent was removed under reduced pressure to give a brown oil. Purification by silica gel flash column chromatography (hexanes  $\rightarrow$   $\text{CH}_2\text{Cl}_2$ , step gradient) gave 1.34 grams (6.80 mmol, 78 % yield) of product as a brown oil.  $^1\text{H}$  NMR (500 MHz,  $\text{CDCl}_3$ ):  $\delta$  8.82 (s, 1H), 8.60 (s, 1H), 7.84-7.80 (d,  $J = 7.5$  Hz, 1H), 7.54-7.50 (td,  $J = 7.5$  Hz, 1.7 Hz, 1H), 7.36-7.26 (m, 2H), 7.16-7.08 (m, 2H).  $^{13}\text{C}$  NMR (126 MHz,  $\text{CDCl}_3$ ):  $\delta$  163.6, 161.6, 152.2, 149.7, 138.5, 133.4, 130.6 (d,  $J = 7.6$  Hz), 124.1 (d,  $J = 3.8$  Hz), 123.2, 115.6 (d,  $J = 21.4$  Hz), 111.2 (d,  $J = 16.4$  Hz), 90.2 (d,  $J = 2.9$  Hz), 86.0. TLC:  $R_f = 0.4$  ( $\text{CH}_2\text{Cl}_2$ ). IR (ATR): 3421 (w), 3033 (m), 2226 (w), 1917 (w), 1844 (w), 1795 (w), 1733 (w), 1716 (w), 1698 (w), 1662 (w), 1612 (w), 1572 (m), 1561 (s), 1542 (w), 1524 (w), 1492 (s), 1473 (m), 1452 (m), 1406 (s), 1329 (w), 1264 (s), 1221 (s), 1187 (m), 1159 (w), 1145 (w), 1120 (w), 1098 (s), 1022 (s), 943 (w). HRMS (DART): calculated for  $[\text{C}_{13}\text{H}_8\text{FNH}]^+$  198.0714, measured 198.0697.  $^1\text{H}$  and  $^{13}\text{C}$  NMR spectra available on SI page 39.

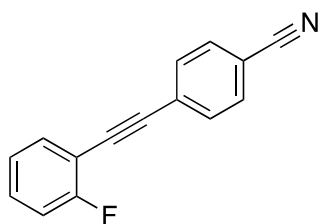

**1h**

In a sealed tube were added  $\text{PdCl}_2(\text{PPh}_3)_2$  (88 mg, 0.13 mmol), CuI (48 mg, 0.25 mmol), and 4-ethynylbenzonitrile (1.144 g, 9.00 mmol). The mixture was purged with Argon for 5 minutes, and then degassed 2-fluoro-1-iodobenzene (1.0 mL, 8.75 mmol), and triethylamine (12 mL) were added in that order. The mixture was stirred at room temperature for 18 hours and then diluted with  $\text{CH}_2\text{Cl}_2$  and aqueous  $\text{NH}_4\text{Cl}$ . The layers were separated and the aqueous phase extracted with  $\text{CH}_2\text{Cl}_2$  (3 X 80 mL). The combined organic layers were washed with  $\text{H}_2\text{O}$  (80 mL) and dried over  $\text{Na}_2\text{SO}_4$ . The solvent was removed under reduced pressure to give a brown oil. Purification by silica gel flash column chromatography (hexanes  $\rightarrow$  EtOAc/hexanes, 1/9, step gradient) gave 290 mg (1.31 mmol, 15 % yield) of product as a white solid.  $^1\text{H}$  NMR (500 MHz,  $\text{CDCl}_3$ ):  $\delta$  7.66-7.61 (m, 4H), 7.55-7.51 (td,  $J = 7.5$  Hz, 1.7 Hz, 1H), 7.41-7.35 (m, 1H), 7.19-7.11 (m,

2H).  $^{13}\text{C}$  NMR (126 MHz,  $\text{CDCl}_3$ ):  $\delta$  163.7, 161.7, 133.5, 132.1 (d,  $J=12.6$  Hz), 130.9 (d,  $J=7.6$  Hz), 127.8, 124.1 (d,  $J=15.0$  Hz), 118.4, 115.7 (d,  $J=85.0$  Hz), 111.8, 111.0 (d,  $J=17.6$ ), 92.5 (d,  $J=3.4$ ), 87.0. TLC:  $R_f=0.5$  (EtOAc/hexanes, 1/9). IR (ATR): 3030 (w), 2924 (m), 2880 (w), 2221 (s), 1931 (m), 1796 (w), 1716 (w), 1698 (w), 1676 (w), 1600 (s), 1574 (m), 1555 (m), 1542 (w), 1535 (w), 1504 (s), 1485 (s), 1442 (m), 1409 (m), 1320 (w), 1263 (s), 1216 (s), 1179 (m), 1155 (w), 1136 (w), 1108 (w), 1096 (s), 1029 (m), 1017 (m). HRMS (DART): calculated for  $[\text{C}_{15}\text{H}_8\text{FNH}]^+$  222.0714, measured 222.0695.  $^1\text{H}$  and  $^{13}\text{C}$  NMR spectra available on SI page 40.

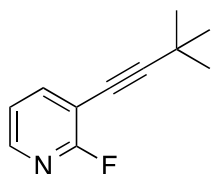

**1j**

In a sealed tube were added  $\text{PdCl}_2(\text{PPh}_3)_2$  (88 mg, 0.13 mmol), CuI (48 mg, 0.25 mmol), and 2-fluoro-3-iodopyridine (1.95 g, 8.75 mmol). The mixture was purged with Argon for 5 minutes, and then degassed 3,3-dimethyl-1-butyne (1.1 mL, 8.93 mmol), and triethylamine (12 mL) were added in that order. The mixture was stirred at room temperature for 18 hours and then diluted with  $\text{CH}_2\text{Cl}_2$  and aqueous  $\text{NH}_4\text{Cl}$ . The layers were separated and the aqueous phase extracted with  $\text{CH}_2\text{Cl}_2$  (3 X 80 mL). The combined organic layers were washed with  $\text{H}_2\text{O}$  (80 mL) and dried over  $\text{Na}_2\text{SO}_4$ . The solvent was removed under reduced pressure to give a brown oil. Purification by silica gel flash column chromatography (hexanes  $\rightarrow$  EtOAc/hexanes, 1/9, step gradient) gave 1.02 g (5.76 mmol, 66 % yield) of product as a brown oil.  $^1\text{H}$  NMR (500 MHz,  $\text{CDCl}_3$ ):  $\delta$ : 8.10-8.07 (ddd,  $J=4.9$  Hz, 2.0 Hz, 1.0 Hz, 1H), 7.79-7.74 (dd,  $J=7.5$  Hz, 2.0 Hz, 1H), 7.13-7.09 (dd,  $J=5.0$  Hz, 1.8 Hz, 1H), 1.34 (s, 9H).  $^{13}\text{C}$  NMR (126 MHz,  $\text{CDCl}_3$ ):  $\delta$ : 163.7, 161.8, 145.7 (d,  $J=14.5$  Hz), 143.3 (d,  $J=2.9$  Hz), 120.8 (d,  $J=4.5$  Hz), 105.7 (d,  $J=1.9$  Hz), 71.0 (d,  $J=4.6$  Hz), 30.7, 28.2. TLC:  $R_f=0.6$  (EtOAc/hexanes, 1/9). IR (ATR): 3056 (m), 2223 (m), 1955 (w), 1884 (w), 1748 (w), 1716 (w), 1698 (w), 1674 (w), 1593 (m), 1562 (m), 1491 (s), 1430 (s), 1391 (w), 1316 (w), 1291 (w), 1278 (w), 1252 (s), 1212 (m), 1178 (w), 1151 (m), 1069 (m), 1027 (m). HRMS (DART): calculated for  $[\text{C}_{11}\text{H}_{12}\text{FNH}]^+$  178.1027, measured 178.1025.  $^1\text{H}$  and  $^{13}\text{C}$  NMR spectra available on SI page 41.

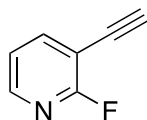

**1k**

In a sealed tube were added  $\text{PdCl}_2(\text{PPh}_3)_2$  (88 mg, 0.13 mmol), CuI (48 mg, 0.25 mmol), and 2-fluoro-3-iodopyridine (1.95 g, 8.75 mmol). The mixture was purged with Argon for 5 minutes, and then degassed ethynyltrimethylsilane (1.3 mL, 9.20 mmol), and triethylamine (12 mL) were added in that order. The mixture was stirred at room temperature for 18 hours and then diluted with  $\text{CH}_2\text{Cl}_2$  and aqueous  $\text{NH}_4\text{Cl}$ . The layers



were separated and the aqueous phase extracted with CH<sub>2</sub>Cl<sub>2</sub> (3 X 80 mL). The combined organic layers were washed with H<sub>2</sub>O (80 mL) and dried over Na<sub>2</sub>SO<sub>4</sub>. The solvent was removed under reduced pressure to give a brown oil. Deprotection (addition of tetrabutyl ammonium fluoride [1M in THF, 10 mL, 10 mmol], and stirring at room temperature for 30 minutes) followed an initial purification of the TMS protected product by silica gel flash column chromatography (CH<sub>2</sub>Cl<sub>2</sub> → MeOH/CH<sub>2</sub>Cl<sub>2</sub>, 1/19, step gradient). The mixture was then diluted with CH<sub>2</sub>Cl<sub>2</sub> and aqueous NH<sub>4</sub>Cl. The layers were separated and the aqueous phase extracted with CH<sub>2</sub>Cl<sub>2</sub> (3 X 80 mL). The combined organic layers were washed with H<sub>2</sub>O (80 mL) and dried over Na<sub>2</sub>SO<sub>4</sub>. The solvent was removed under reduced pressure to give a brown oil. Purification by silica gel flash column chromatography (CH<sub>2</sub>Cl<sub>2</sub> → MeOH/CH<sub>2</sub>Cl<sub>2</sub>, 1/19) gave 854 mg (7.06 mmol, 81 % yield) of product as a yellow solid. <sup>1</sup>H NMR (500 MHz, CDCl<sub>3</sub>): δ 8.22-8.17 (m, 1H), 7.92-7.87 (m, 1H), 7.20-7.16 (m, 1H), 3.38 (s, 1H). <sup>13</sup>C NMR (126 MHz, CDCl<sub>3</sub>): δ 164.2, 162.2, 147.3 (d, *J* = 14.5 Hz), 144.2 (d, *J* = 2.5 Hz), 120.1 (d, *J* = 3.8 Hz), 106.3 (d, *J* = 31.5 Hz), 84.1 (d, *J* = 2.0 Hz). TLC: *R*<sub>f</sub> = 0.8 (MeOH/CH<sub>2</sub>Cl<sub>2</sub>, 1/19). IR (ATR): 3243 (s), 3096 (m), 3054 (m), 2926 (m), 2172 (w), 2109 (s), 1971 (m), 1938 (m), 1906 (m), 1765 (m), 1599 (s), 1566 (s), 1552 (m), 1443 (s), 1421 (s), 1325 (m), 1291 (s), 1252 (s), 1172 (s), 1107 (s). HRMS (DART): calculated for [C<sub>7</sub>H<sub>4</sub>FNH]<sup>+</sup> 122.0401, measured 122.0408. <sup>1</sup>H and <sup>13</sup>C NMR spectra available on SI page 42.

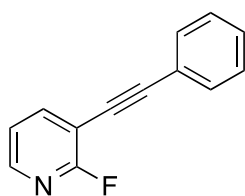

**11**

In a sealed tube were added PdCl<sub>2</sub>(PPh<sub>3</sub>)<sub>2</sub> (88 mg, 0.13 mmol), CuI (48 mg, 0.25 mmol), and 2-fluoro-3-iodopyridine (1.95 g, 8.75 mmol). The mixture was purged with Argon for 5 minutes, and then degassed phenylacetylene (1.0 mL, 9.11 mmol), and triethylamine (12 mL) were added in that order. The mixture was stirred at room temperature for 18 hours and then diluted with CH<sub>2</sub>Cl<sub>2</sub> and aqueous NH<sub>4</sub>Cl. The layers were separated and the aqueous phase extracted with CH<sub>2</sub>Cl<sub>2</sub> (3 X 80 mL). The combined organic layers were washed with H<sub>2</sub>O (80 mL) and dried over Na<sub>2</sub>SO<sub>4</sub>. The solvent was removed under reduced pressure to give a brown oil. Purification by silica gel flash column chromatography (hexanes → EtOAc/hexanes, 1/9, step gradient) gave 1.40 g (7.10 mmol, 81 % yield) of product as a brown solid. <sup>1</sup>H NMR (500 MHz, CDCl<sub>3</sub>): δ 8.10-8.07 (dt, *J* = 5 Hz, 0.9 Hz, 1H), 7.84-7.79 (m, 1H), 7.53-7.48 (m, 2H), 7.33-7.28 (m, 3H), 7.11-7.07 (m, 1H). <sup>13</sup>C NMR (126 MHz, CDCl<sub>3</sub>): δ 163.4, 161.5, 146.5 (d, *J* = 13.8 Hz), 143.3 (d, *J* = 2.5 Hz), 131.7, 129.1, 128.5, 122.1, 121.1 (d, *J* = 4.3 Hz), 107.4 (d, *J* = 31.5 Hz), 96.0 (d, *J* = 1.9 Hz), 81.0 (d, *J* = 5.3 Hz). TLC: *R*<sub>f</sub> = 0.4 (EtOAc/hexanes, 1/9). IR (ATR): 3057 (m), 2223 (m), 1955 (w), 1884 (w), 1748 (w), 1716 (w), 1698 (w), 1674 (w), 1593 (s), 1562 (s), 1491 (s), 1430 (s), 1391 (s), 1291 (w), 1278 (w), 1252 (s), 1212 (s), 1178 (w), 1151 (m), 1097 (s), 1069 (w), 1027 (m). HRMS (DART): calculated for [C<sub>13</sub>H<sub>8</sub>FNH]<sup>+</sup> 198.0714, measured 198.0714. <sup>1</sup>H and <sup>13</sup>C NMR spectra available on SI page 43.

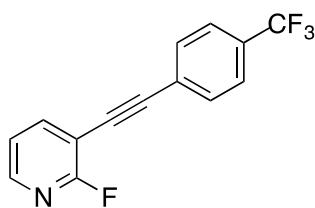

**1m**

In a sealed tube were added  $\text{PdCl}_2(\text{PPh}_3)_2$  (88 mg, 0.13 mmol),  $\text{CuI}$  (48 mg, 0.25 mmol), and 2-fluoro-3-iodopyridine (1.95 g, 8.75 mmol). The mixture was purged with Argon for 5 minutes, and then degassed 1-ethynyl-4-(trifluoromethyl)benzene (1.5 mL, 9.19 mmol), and triethylamine (12 mL) were added in that order. The mixture was stirred at room temperature for 18 hours and then diluted with  $\text{CH}_2\text{Cl}_2$  and aqueous  $\text{NH}_4\text{Cl}$ . The layers were separated and the aqueous phase extracted with  $\text{CH}_2\text{Cl}_2$  (3 X 80 mL). The combined organic layers were washed with  $\text{H}_2\text{O}$  (80 mL) and dried over  $\text{Na}_2\text{SO}_4$ . The solvent was removed under reduced pressure to give a brown oil. Purification by silica gel flash column chromatography (hexanes  $\rightarrow$  EtOAc/hexanes, 1/9, step gradient) gave 1.71 g (6.45 mmol, 74 % yield) of product as a white solid.  $^1\text{H}$  NMR (500 MHz,  $\text{CDCl}_3$ ):  $\delta$  8.22-8.19 (dq,  $J = 5.0$  Hz, 1.0 Hz, 1H), 7.96-7.91 (m, 1H), 7.69-7.60 (m, 4H), 7.24-7.20 (m, 1H).  $^{13}\text{C}$  NMR (126 MHz,  $\text{CDCl}_3$ ):  $\delta$  163.6, 161.7, 147.2 (d,  $J = 13.9$  Hz), 143.5 (d,  $J = 2.4$  Hz), 132.0, 130.7 (q,  $J = 32.8$  Hz), 126.0 (d,  $J = 1.4$  Hz), 125.4 (q,  $J = 3.8$  Hz), 121.1 (d,  $J = 4.4$  Hz), 106.9 (d,  $J = 31.5$ ), 94.3, 83.1 (d,  $J = 5.3$  Hz). TLC:  $R_f = 0.5$  (EtOAc/hexanes, 1/9). IR (ATR): 3050 (w), 2890 (w), 1931 (w), 1748 (w), 1699 (w), 1675 (w), 1614 (w), 1595 (m), 1562 (m), 1524 (w), 1501 (w), 1456 (m), 1437 (s), 1403 (w), 1321 (s), 1255 (m), 1216 (w), 1184 (w), 1162 (s), 1125 (m), 1063 (s), 1013 (s). HRMS (DART): calculated for  $[\text{C}_{14}\text{H}_7\text{FNH}]^+$  266.0587, measured 266.0597.  $^1\text{H}$  and  $^{13}\text{C}$  NMR spectra available on SI page 44.

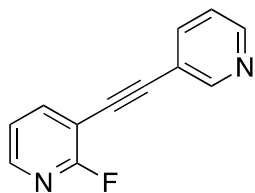

**1n**

In a sealed tube were added  $\text{PdCl}_2(\text{PPh}_3)_2$  (88 mg, 0.13 mmol),  $\text{CuI}$  (48 mg, 0.25 mmol), 2-fluoro-3-iodopyridine (1.95 g, 8.75 mmol), and 3-ethynylpyridine (928 mg, 9.00 mmol). The mixture was purged with Argon for 5 minutes, and then degassed triethylamine (12 mL) was added. The mixture was stirred at room temperature for 18 hours and then diluted with  $\text{CH}_2\text{Cl}_2$  and aqueous  $\text{NH}_4\text{Cl}$ . The layers were separated and the aqueous phase extracted with  $\text{CH}_2\text{Cl}_2$  (3 X 80 mL). The combined organic layers were washed with  $\text{H}_2\text{O}$  (80 mL) and dried over  $\text{Na}_2\text{SO}_4$ . The solvent was removed under reduced pressure to give a brown oil. Purification by silica gel flash column chromatography ( $\text{CH}_2\text{Cl}_2 \rightarrow \text{MeOH}/\text{CH}_2\text{Cl}_2$ , 1/19, step gradient) gave 1.25 g (6.31 mmol, 72 % yield) of product as a yellow solid.  $^1\text{H}$  NMR (500 MHz,  $\text{CDCl}_3$ ):  $\delta$  8.73-8.69 (d,  $J =$

1.5 Hz, 1H), 8.53-8.50 (dd,  $J = 5.0$  Hz, 1.5 Hz, 1H), 8.15-8.10 (dq,  $J = 5.0$  Hz, 0.9 Hz, 1H), 7.89-7.84 (m, 1H), 7.78-7.75 (dt,  $J = 8.0$  Hz, 2.0 Hz, 1H), 7.26-7.22 (ddd,  $J = 8.0$  Hz, 5.0 Hz, 0.8 Hz, 1H), 7.17-7.13 (m, 1H).  $^{13}\text{C}$  NMR (126 MHz,  $\text{CDCl}_3$ ):  $\delta$  163.4, 161.6, 152.3, 149.3, 147.2 (d,  $J = 14.5$  Hz), 143.4 (d,  $J = 2.4$  Hz), 138.6, 123.1, 121.1 (d,  $J = 2.5$  Hz), 119.4, 92.4 (d,  $J = 1.9$  Hz), 84.1 (d,  $J = 12.6$  Hz). TLC:  $R_f = 0.2$  ( $\text{CH}_2\text{Cl}_2$ ). IR (ATR): 3084 (w), 3028 (w), 2228 (w), 1907 (w), 1748 (w), 1716 (w), 1699 (w), 1675 (w), 1602 (m), 1563 (s), 1542 (m), 1501 (w), 1477 (s), 1433 (s), 1409 (m), 1318 (m), 1297 (w), 1250 (s), 1216 (m), 1188 (m), 1160 (w), 1118 (m), 1096 (s), 1033 (w), 1023 (m). HRMS (DART): calculated for  $[\text{C}_{12}\text{H}_7\text{FN}_2\text{H}]^+$  199.0666, measured 199.0664.  $^1\text{H}$  and  $^{13}\text{C}$  NMR spectra available on SI page 45.

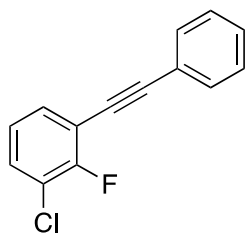

**10**

In a sealed tube were added  $\text{PdCl}_2(\text{PPh}_3)_2$  (88 mg, 0.13 mmol) and  $\text{CuI}$  (48 mg, 0.25 mmol). The mixture was purged with Argon for 5 minutes, and then degassed 1-chloro-2-fluoro-3-iodobenzene (2.24 g, 8.75 mmol), degassed phenylacetylene (1.0 mL, 9.11 mmol), and triethylamine (12 mL) were added in that order. The mixture was stirred at room temperature for 18 hours and then diluted with  $\text{CH}_2\text{Cl}_2$  and aqueous  $\text{NH}_4\text{Cl}$ . The layers were separated and the aqueous phase extracted with  $\text{CH}_2\text{Cl}_2$  (3 X 80 mL). The combined organic layers were washed with  $\text{H}_2\text{O}$  (80 mL) and dried over  $\text{Na}_2\text{SO}_4$ . The solvent was removed under reduced pressure to give a brown oil. Purification by silica gel flash column chromatography (hexanes) gave 1.56 grams (7.43 mmol, 85 % yield) of product as a yellow solid.  $^1\text{H}$  NMR (500 MHz,  $\text{CDCl}_3$ ):  $\delta$  7.65-7.60 (m, 2H), 7.49-7.36 (m, 5H), 7.11-7.07 (td,  $J = 8.0$  Hz, 1.3 Hz, 1H).  $^{13}\text{C}$  NMR (126 MHz,  $\text{CDCl}_3$ ):  $\delta$  159.3, 157.2, 131.8, 131.7, 130.6, 129.0, 128.5, 124.4 (d,  $J = 5.0$  Hz), 122.6, 113.7 (d,  $J = 15.1$ ), 95.7 (d,  $J = 3.8$  Hz), 81.8. TLC:  $R_f = 0.7$  (hexanes). IR (ATR): 3054 (m), 2197 (w), 1946 (w), 1869 (w), 1797 (w), 1747 (w), 1716 (w), 1698 (w), 1676 (w), 1603 (m), 1571 (m), 1556 (w), 1542 (w), 1524 (w), 1492 (s), 1464 (m), 1448 (s), 1314 (w), 1272 (w), 1239 (s), 1179 (w), 1156 (m), 1136 (m), 1061 (w), 1071 (m), 1027 (m). HRMS (DART): calculated for  $[\text{C}_{14}\text{H}_8\text{ClFH}]^+$  231.0371, measured 231.0377.  $^1\text{H}$  and  $^{13}\text{C}$  NMR spectra available on SI page 46.

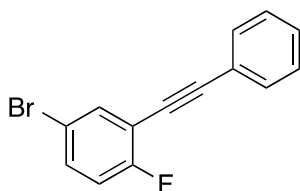

**1p**

In a sealed tube were added  $\text{PdCl}_2(\text{PPh}_3)_2$  (88 mg, 0.13 mmol) and  $\text{CuI}$  (48 mg, 0.25 mmol). The mixture was purged with Argon for 5 minutes, and then degassed 4-bromo-1-fluoro-2-iodobenzene (2.63 g, 8.75 mmol), degassed phenylacetylene (1.0 mL, 9.11 mmol), and triethylamine (12 mL) were added in that order. The mixture was stirred at room temperature for 18 hours and then diluted with  $\text{CH}_2\text{Cl}_2$  and aqueous  $\text{NH}_4\text{Cl}$ . The layers were separated and the aqueous phase extracted with  $\text{CH}_2\text{Cl}_2$  (3 X 80 mL). The combined organic layers were washed with  $\text{H}_2\text{O}$  (80 mL) and dried over  $\text{Na}_2\text{SO}_4$ . The solvent was removed under reduced pressure to give a brown oil. Purification by silica gel flash column chromatography (hexanes) gave 1.99 grams (7.26 mmol, 83 % yield) of product as a yellow oil.  $^1\text{H}$  NMR (500 MHz,  $\text{CDCl}_3$ ):  $\delta$  7.71-7.68 (dd,  $J = 6.5$  Hz, 2.5 Hz, 1H), 7.65-7.60 (m, 2H), 7.46-7.38 (m, 4H), 7.04-6.99 (t,  $J = 9$  Hz, 1H).  $^{13}\text{C}$  NMR (126 MHz,  $\text{CDCl}_3$ ):  $\delta$  162.8, 160.8, 135.8, 132.8 (d,  $J = 7.6$  Hz), 131.9, 129.0, 128.5, 122.5, 117.2 (d,  $J = 22.7$  Hz), 116.3 (d,  $J = 3.8$  Hz), 114.1 (d,  $J = 16.4$  Hz), 95.6 (d,  $J = 3.3$  Hz), 81.4. TLC:  $R_f = 0.7$  (hexanes). IR (ATR): 3061 (m), 2222 (m), 1947 (w), 1877 (w), 1748 (w), 1716 (w), 1697 (w), 1675 (w), 1605 (w), 1572 (w), 1555 (w), 1541 (w), 1495 (s), 1479 (s), 1442 (m), 1392 (s), 1276 (w), 1255 (s), 1222 (s), 1178 (w), 1158 (w), 1144 (w), 1107 (s), 1069 (s), 1025 (m). HRMS (DART): calculated for  $[\text{C}_{14}\text{H}_8\text{BrFH}]^+$  274.9866, measured 274.9852.  $^1\text{H}$  and  $^{13}\text{C}$  NMR spectra available on SI page 47.

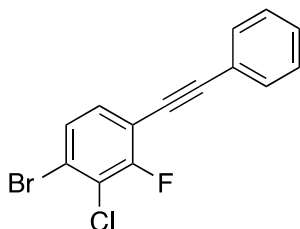

**1q**

In a sealed tube were added  $\text{PdCl}_2(\text{PPh}_3)_2$  (88 mg, 0.13 mmol) and  $\text{CuI}$  (48 mg, 0.25 mmol). The mixture was purged with Argon for 5 minutes, and then degassed 1-bromo-2-chloro-3-fluoro-4-iodobenzene (2.92 g, 8.75 mmol), degassed phenylacetylene (1.0 mL, 9.11 mmol), and triethylamine (12 mL) were added in that order. The mixture was stirred at room temperature for 2 hours and then diluted with  $\text{CH}_2\text{Cl}_2$  and aqueous  $\text{NH}_4\text{Cl}$ . The layers were separated and the aqueous phase extracted with Ethyl Acetate (3 X 80 mL). The combined organic layers were washed with  $\text{H}_2\text{O}$  (80 mL) and dried over  $\text{Na}_2\text{SO}_4$ . The solvent was removed under reduced pressure to give a brown liquid. Purification by silica gel flash column chromatography (hexanes) gave 1.97 grams (6.40 mmol, 73 % yield) of product as an off-white solid.  $^1\text{H}$  NMR (500 MHz,  $\text{CDCl}_3$ ):  $\delta$  7.62-7.56 (m, 2H), 7.44-7.22 (m, 5H).  $^{13}\text{C}$  NMR (126 MHz,  $\text{CDCl}_3$ ):  $\delta$  159.7, 157.7, 132.5, 131.8, 131.3 (d,  $J = 1.6$  Hz), 129.2 (d,  $J = 16.4$  Hz), 128.5 (d,  $J = 1.5$  Hz), 123.8, 122.3, 121.8, 112.6 (d,  $J$

= 16.8), 95.6 (d,  $J = 3.8$ ), 81.4 (d,  $J = 63$  Hz). TLC:  $R_f = 0.7$  (hexanes). IR (ATR): 3053 (m), 2538 (w), 2206 (m), 1951 (w), 1885 (w), 1795 (w), 1748 (w), 1716 (w), 1700 (w), 1670 (w), 1587 (m), 1571 (w), 1542 (w), 1525 (w), 1489 (s), 1458 (s), 1441 (m), 1411 (s), 1318 (w), 1260 (w), 1222 (m), 1182 (m), 1142 (w), 1157 (w), 1127 (w), 1069 (w), 1025 (w). HRMS (DART): calculated for  $[C_{14}H_7BrClFH]^+$  308.9476, measured 308.9473.  $^1H$  and  $^{13}C$  NMR spectra available on SI page 48.

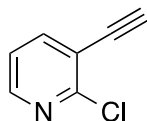

**1r**

In a reaction vessel were added 2-chloro-3-trimethylsilanylethynyl-pyridine (0.5 g, 2.38 mmol) and tetrabutylammonium fluoride solution (1.0 M in THF, 4 mL, 4 mmol), in that order. The mixture was stirred at room temperature for 30 minutes and then diluted with ethyl acetate and water. The layers were separated and the aqueous phase extracted with ethyl acetate (3 X 80 mL). The combined organic layers were washed with  $H_2O$  (80 mL) and dried over  $Na_2SO_4$ . The solvent was removed under reduced pressure to give a brown oil. Purification by silica gel flash column chromatography (hexanes  $\rightarrow$  EtOAc/hexanes, 3/7, step gradient) gave 0.32 g (2.33 mmol, 97 % yield) of product as a white solid.  $^1H$  NMR (500 MHz,  $CDCl_3$ ):  $\delta$  8.33-8.29 (m, 1H), 7.81-7.77 (m, 1H), 7.20-7.16 (m, 1H) 3.48 (s, 1H).  $^{13}C$  NMR (126 MHz,  $CDCl_3$ ):  $\delta$  152.5, 148.8, 142.1, 121.8, 119.4, 85.0, 78.2. TLC:  $R_f = 0.4$  (EtOAc/hexanes, 1/9). IR (ATR): 3212 (s), 2106 (m), 1962 (w) 1926 (w), 1839 (w), 1748 (w), 1716 (w), 1698 (w), 1675 (w), 1646 (w), 1578 (m), 1556 (s), 1535 (m), 1501 (w), 1473 (w), 1440 (m), 1389 (s), 1275 (m), 1262 (m), 1125 (s), 1092 (w), 1077 (s), 1070 (s). HRMS (DART): calculated for  $[C_7H_4ClNH]^+$  138.0105, measured 138.0107.  $^1H$  and  $^{13}C$  NMR spectra available on SI page 49.

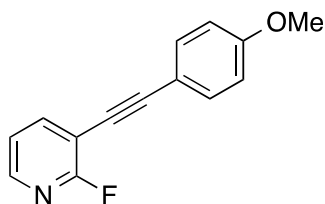

**1s**

In a sealed tube were added  $PdCl_2(PPh_3)_2$  (88 mg, 0.13 mmol),  $CuI$  (48 mg, 0.25 mmol), 2-fluoro-3-iodopyridine (1.95 g, 8.75 mmol), and 1-ethynyl-4-methoxybenzene (1.2 g, 9.00 mmol). The mixture was purged with Argon for 5 minutes, and then degassed triethylamine (12 mL) was added. The mixture was stirred at room temperature for 18 hours and then diluted with  $CH_2Cl_2$  and aqueous  $NH_4Cl$ . The layers were separated and the aqueous phase extracted with  $CH_2Cl_2$  (3 X 80 mL). The combined organic layers were washed with  $H_2O$  (80 mL) and dried over  $Na_2SO_4$ . The solvent was removed under reduced pressure to give a brown oil. Purification by silica gel flash column chromatography (hexanes/ $CH_2Cl_2$  1:1  $\rightarrow$   $CH_2Cl_2$ , step gradient) gave 1.63 g (7.17 mmol,

82 % yield) of product as a yellow solid.  $^1\text{H}$  NMR (500 MHz,  $\text{CDCl}_3$ ):  $\delta$  8.10-8.07 (dq,  $J$  = 5 Hz, 1H), 7.85-7.80 (ddd,  $J$  = 9.3 Hz, 7.5 Hz, 2 Hz, 1H), 7.47-7.43 (m, 2H), 7.14-7.10 (ddd,  $J$  = 7.5 Hz, 5 Hz, 2 Hz, 1H), 6.86-6.82 (m, 2H), 3.77 (s, 3H).  $^{13}\text{C}$  NMR (126 MHz,  $\text{CDCl}_3$ ):  $\delta$  163.4, 161.4, 160.2, 146.2-146.0 (d,  $J$  = 13.9 Hz), 143.1-143.0 (d,  $J$  = 2.5 Hz), 133.3, 121.1-121.0 (d,  $J$  = 4.4 Hz), 114.1, 108.0-107.3 (d,  $J$  = 125 Hz), 96.2 (d,  $J$  = 1.9 Hz), 79.8 (d,  $J$  = 5.0 Hz), 55.2. TLC:  $R_f$  = 0.5 ( $\text{CH}_2\text{Cl}_2$ ). IR (ATR): 3056 (w), 3006 (w), 2962 (m), 2936 (m), 2838 (m), 2539 (m), 2221 (s), 2192 (m), 2015 (w), 1889 (w), 1607 (s), 1596 (s), 1561 (s), 1508 (s), 1456 (s), 1431 (s), 1319 (s), 1288 (s), 1247 (s), 1212 (s), 1174 (s), 1146 (s), 1107 (s), 1096 (s), 1027 (s). HRMS (DART): calculated for  $[\text{C}_{14}\text{H}_{10}\text{FNOH}]^+$  228.0819, measured 228.0820.  $^1\text{H}$  and  $^{13}\text{C}$  NMR spectra available on SI page 50.

## Synthesis of N-tolyl indoles (2a-p)

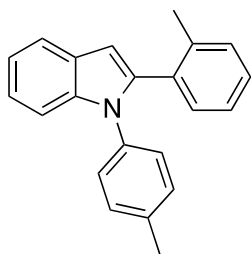

**2b**

In a reaction flask under Ar, **1b** (105 mg, 0.5 mmol), p-toluidine (118 mg, 1.1 mmol), and DMSO (1.0 mL) were added. The reaction was started with the addition of KO<sup>t</sup>Bu (123 mg, 1.1 mmol). The reaction was stirred on an aluminum heating block at 100°C for 18 hr. The reaction was quenched by dilution with CH<sub>2</sub>Cl<sub>2</sub> and addition of NH<sub>4</sub>Cl. The layers were separated and the aqueous phase extracted with CH<sub>2</sub>Cl<sub>2</sub> (3 X 20 mL). The combined organic layers were washed with H<sub>2</sub>O (80 mL) and dried over Na<sub>2</sub>SO<sub>4</sub>. The solvent was removed under reduced pressure to give a brown oil. Purification by silica gel flash column chromatography (hexanes → CH<sub>2</sub>Cl<sub>2</sub>, step gradient) gave 101 mg (0.34 mmol, 68 % yield) of product as a colorless oil. <sup>1</sup>H NMR (500 MHz, CDCl<sub>3</sub>): δ 7.74-7.69 (m, 1H), 7.40-7.36 (m, 1H), 7.28-7.23 (m, 1H), 7.23-7.18 (m, 3H), 7.16-7.11 (m, 4H), 7.09-7.06 (m, 2H), 6.65 (s, 1H), 2.35 (s, 3H), 2.13 (s, 3H). <sup>13</sup>C NMR (126 MHz, CDCl<sub>3</sub>): δ 140.2, 137.7, 137.6, 136.4, 135.5, 132.7, 131.5, 129.9, 129.5, 128.2, 128.1, 127.1, 125.2, 121.9, 120.4, 120.4, 110.6, 104.0, 21.1, 20.4. TLC: R<sub>f</sub> = 0.5 (CH<sub>2</sub>Cl<sub>2</sub>). IR (ATR): 3015 (s), 2221 (m), 2066 (w), 1634 (s), 1512 (s), 1488 (s), 1453 (s), 1262 (m), 1220 (m), 1097 (m), 1030 (w). HRMS (DART): calculated for [C<sub>22</sub>H<sub>19</sub>NH]<sup>+</sup> 298.1590, measured 298.1581. <sup>1</sup>H and <sup>13</sup>C NMR spectra available on SI page 51.

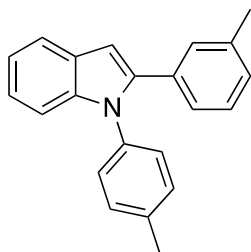

**2c**

In a reaction flask under Ar, **1c** (105 mg, 0.5 mmol), p-toluidine (119 mg, 1.1 mmol), and DMSO (1.0 mL) were added. The reaction was started with the addition of KO<sup>t</sup>Bu (124 mg, 1.1 mmol). The reaction was stirred on an aluminum heating block at 100°C for 18 hr. The reaction was quenched by dilution with CH<sub>2</sub>Cl<sub>2</sub> and addition of NH<sub>4</sub>Cl. The layers were separated and the aqueous phase extracted with CH<sub>2</sub>Cl<sub>2</sub> (3 X 20 mL). The combined organic layers were washed with H<sub>2</sub>O (80 mL) and dried over Na<sub>2</sub>SO<sub>4</sub>. The solvent was removed under reduced pressure to give a brown oil. Purification by silica gel flash column chromatography (hexanes → CH<sub>2</sub>Cl<sub>2</sub>, step gradient) gave 107 mg (0.36 mmol, 72 % yield) of product as a white solid. <sup>1</sup>H NMR (500 MHz, CDCl<sub>3</sub>): δ: 7.78-7.74

(m, 1H), 7.37-7.34 (m, 1H), 7.30-7.16 (m, 8H), 7.13-7.07 (m, 2H), 6.87 (d,  $J = 0.8$  Hz), 2.47 (s, 3H), 2.36 (s, 3H).  $^{13}\text{C}$  NMR (126 MHz,  $\text{CDCl}_3$ ):  $\delta$  141.0, 139.2, 137.8, 137.0, 136.0, 132.6, 129.9, 129.7, 128.3, 128.1, 128.0, 127.9, 126.1, 122.2, 120.6, 120.5, 110.7, 103.4, 21.5, 21.2. TLC:  $R_f = 0.5$  ( $\text{CH}_2\text{Cl}_2$ ). IR (ATR): 3031 (m), 2920 (m), 2862 (w), 1880 (w), 1606 (s), 1510 (s), 1483 (w), 1452 (s), 1376 (m), 1352 (m), 1316 (m), 1274 (w), 1261 (w), 1211 (m), 1173 (w), 1147 (w), 1108 (w), 1095 (w), 1078 (w), 1039 (w), 1014 (w). HRMS (DART): calculated for  $[\text{C}_{22}\text{H}_{19}\text{NH}]^+$  298.1590, measured 298.1598.  $^1\text{H}$  and  $^{13}\text{C}$  NMR spectra available on SI page 52.

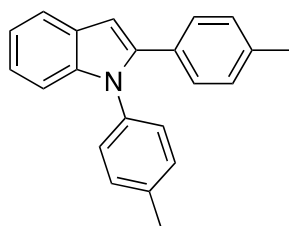

## 2d

In a reaction flask under Ar, **1d** (105 mg, 0.5 mmol), p-toluidine (117 mg, 1.1 mmol), and DMSO (1.0 mL) were added. The reaction was started with the addition of KO $t$ Bu (125 mg, 1.1 mmol). The reaction was stirred on an aluminum heating block at 100°C for 18 hr. The reaction was quenched by dilution with  $\text{CH}_2\text{Cl}_2$  and addition of  $\text{NH}_4\text{Cl}$ . The layers were separated and the aqueous phase extracted with  $\text{CH}_2\text{Cl}_2$  (3 X 20 mL). The combined organic layers were washed with  $\text{H}_2\text{O}$  (80 mL) and dried over  $\text{Na}_2\text{SO}_4$ . The solvent was removed under reduced pressure to give a brown oil. Purification by silica gel flash column chromatography (hexanes  $\rightarrow$   $\text{CH}_2\text{Cl}_2$ /hexanes, 4/6, step gradient) gave 102 mg (0.35 mmol, 69 % yield) of product as a white solid.  $^1\text{H}$  NMR (500 MHz,  $\text{CDCl}_3$ ):  $\delta$  7.74-7.70 (m, 1H), 7.33-7.29 (m, 1H), 7.28-7.17 (m, 8H), 7.12-7.09 (d,  $J = 8$  Hz, 2H), 6.81 (d,  $J = 0.6$  Hz, 1H), 2.45 (s, 3H), 2.36 (s, 3H).  $^{13}\text{C}$  NMR (126 MHz,  $\text{CDCl}_3$ ):  $\delta$  140.9, 139.1, 137.1, 137.0, 136.0, 129.9, 129.8, 128.9, 128.8, 128.3, 127.9, 122.0, 120.5, 120.4, 110.7, 103.0, 21.2, 21.2. TLC:  $R_f = 0.2$  (hexanes). IR (ATR): 3029 (m), 2960 (m), 1844 (w), 1749 (w), 1716 (w), 1699 (w), 1674 (w), 1606 (w), 1555 (w), 1542 (m), 1513 (s), 1500 (m), 1455 (s), 1412 (w), 1380 (m), 1357 (m), 1320 (w), 1307 (m), 1255 (w), 1187 (w), 1174 (w), 1147 (w), 1113 (w), 1021 (w). HRMS (DART): calculated for  $[\text{C}_{22}\text{H}_{19}\text{NH}]^+$  298.1590, measured 298.1573.  $^1\text{H}$  and  $^{13}\text{C}$  NMR spectra available on SI page 53.

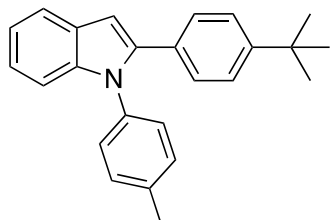

## 2e

In a reaction flask under Ar, **1e** (126 mg, 0.5 mmol), p-toluidine (118 mg, 1.1 mmol), and DMSO (1.0 mL) were added. The reaction was started with the addition of KO $t$ Bu (123



mg, 1.1 mmol). The reaction was stirred on an aluminum heating block at 100°C for 18 hr. The reaction was quenched by dilution with CH<sub>2</sub>Cl<sub>2</sub> and addition of NH<sub>4</sub>Cl. The layers were separated and the aqueous phase extracted with CH<sub>2</sub>Cl<sub>2</sub> (3 X 20 mL). The combined organic layers were washed with H<sub>2</sub>O (80 mL) and dried over Na<sub>2</sub>SO<sub>4</sub>. The solvent was removed under reduced pressure to give a brown oil. Purification by silica gel flash column chromatography (hexanes → CH<sub>2</sub>Cl<sub>2</sub>/hexanes, 1/1, step gradient) gave 114 mg (0.34 mmol, 67 % yield) of product as a white solid. <sup>1</sup>H NMR (500 MHz, CDCl<sub>3</sub>): δ 7.73-7.68 (m, 1H), 7.32-7.23 (m, 7H), 7.21-7.16 (m, 4H), 6.81 (d, *J* = 0.8 Hz, 1H), 2.45 (s, 3H), 1.33 (s, 9H). <sup>13</sup>C NMR (126 MHz, CDCl<sub>3</sub>): δ 150.2, 140.8, 139.2, 137.0, 136.1, 129.9, 129.6, 128.4, 128.3, 127.9.2, 125.0, 122.0, 120.5, 120.3, 110.7, 103.0, 34.5, 31.3, 21.2. TLC: *R*<sub>f</sub> = 0.2 (hexanes). IR (ATR): 3031 (w), 2960 (m), 2864 (w), 1844 (w), 1734 (w), 1716 (w), 1699 (w), 1675 (w), 1606 (w), 1564 (w), 1555 (w), 1541 (w), 1535 (w), 1513 (s), 1503 (m), 1473 (w), 1409 (w), 1378 (m), 1360 (w), 1347 (m), 1321 (m), 1259 (m), 1200 (m), 1175 (w), 1113 (m), 1017 (m). HRMS (DART): calculated for [C<sub>25</sub>H<sub>25</sub>NH]<sup>+</sup> 340.2060, measured 340.2037. <sup>1</sup>H and <sup>13</sup>C NMR spectra available on SI page 54.

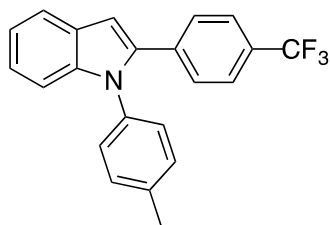

## 2f

In a reaction flask under Ar, **1f** (132 mg, 0.5 mmol), p-toluidine (117 mg, 1.1 mmol), and DMSO (1.0 mL) were added. The reaction was started with the addition of KO<sup>t</sup>Bu (123 mg, 1.1 mmol). The reaction was stirred on an aluminum heating block at 100°C for 18 hr. The reaction was quenched by dilution with CH<sub>2</sub>Cl<sub>2</sub> and addition of NH<sub>4</sub>Cl. The layers were separated and the aqueous phase extracted with CH<sub>2</sub>Cl<sub>2</sub> (3 X 20 mL). The combined organic layers were washed with H<sub>2</sub>O (80 mL) and dried over Na<sub>2</sub>SO<sub>4</sub>. The solvent was removed under reduced pressure to give a brown oil. Purification by silica gel flash column chromatography (hexanes → CH<sub>2</sub>Cl<sub>2</sub>/hexanes 1/1, step gradient) gave 142 mg (0.41 mmol, 81 % yield) of product as a white solid. <sup>1</sup>H NMR (500 MHz, CDCl<sub>3</sub>): δ 7.72-7.49 (m, 1H), 7.53-7.38 (d, *J* = 8.5 Hz, 2H), 7.30-7.17 (m, 7H), 7.16-7.12 (dt, *J* = 8.5 Hz, 2 Hz, 2H), 6.88 (d, *J* = 0.7 Hz), 2.45 (s, 3H). <sup>13</sup>C NMR (126 MHz, CDCl<sub>3</sub>): δ 139.5, 139.0, 137.5, 136.1, 135.5, 130.2, 128.8, 128.0, 127.7, 125.1 (q, *J* = 3.8 Hz), 123.1, 122.9, 120.8 (d, *J* = 12.6 Hz), 110.8, 104.7, 29.7, 21.1. TLC: *R*<sub>f</sub> = 0.3 (hexanes). IR (ATR): 3034 (m), 2920 (m), 1617 (s), 1514 (s), 1474 (w), 1453 (s), 1412 (m), 1379 (m), 1320 (s), 1257 (w), 1212 (m), 1165 (s), 1123 (s), 1109 (s), 1079 (s), 1063 (s), 1016 (s). HRMS (DART): calculated for [C<sub>22</sub>H<sub>16</sub>F<sub>3</sub>NH]<sup>+</sup> 352.1313, measured 352.1317. <sup>1</sup>H and <sup>13</sup>C NMR spectra available on SI page 55.

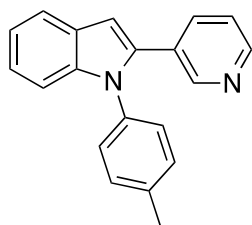

## 2g

In a reaction flask under Ar, **2g** (99 mg, 0.5 mmol), p-toluidine (118 mg, mmol), and DMSO (1.0 mL) were added. The reaction was started with the addition of KO<sup>t</sup>Bu (123 mg, mmol). The reaction was stirred on an aluminum heating block at 100°C for 18 hr. The reaction was quenched by dilution with CH<sub>2</sub>Cl<sub>2</sub> and addition of NH<sub>4</sub>Cl. The layers were separated and the aqueous phase extracted with CH<sub>2</sub>Cl<sub>2</sub> (3 X 20 mL). The combined organic layers were washed with H<sub>2</sub>O (80 mL) and dried over Na<sub>2</sub>SO<sub>4</sub>. The solvent was removed under reduced pressure to give a brown oil. Purification by silica gel flash column chromatography (hexanes → CH<sub>2</sub>Cl<sub>2</sub>, step gradient) gave 112 mg (0.4 mmol, 79 % yield) of product as a brown solid. <sup>1</sup>H NMR (500 MHz, CDCl<sub>3</sub>): δ 8.65-8.62 (m, 1H), 8.48-8.44 (m, 1H), 7.72-7.68 (m, 1H), 5.54-5.50 (m, 1H), 7.27-7.11 (m, 8H), 6.87 (s, 1H), 2.42 (s, 3H). <sup>13</sup>C NMR (126 MHz, CDCl<sub>3</sub>): δ 149.5, 148.1, 139.7, 137.6, 137.2, 135.6, 135.5, 130.0, 128.9, 128.2, 122.7, 120.8, 120.7, 110.7, 104.4, 20.9. TLC: R<sub>f</sub> = 0.6 (CH<sub>2</sub>Cl<sub>2</sub>). IR (ATR): 3029 (m), 2920 (m), 1920 (w), 1771 (w), 1697 (w), 1661 (w), 1607 (m), 1571 (m), 1555 (w), 1541 (w), 1535 (w), 1510 (s), 1448 (s), 1421 (m), 1376 (m), 1364 (m), 1350 (m), 1324 (m), 1310 (m), 1254 (m), 1208 (m), 1173 (m), 1143 (w), 1127 (w), 1108 (w), 1104 (m), 1038 (w), 1024 (m), 1016 (m). HRMS (DART): calculated for [C<sub>20</sub>H<sub>16</sub>N<sub>2</sub>H]<sup>+</sup> 285.1386, measured 285.1362. <sup>1</sup>H and <sup>13</sup>C NMR spectra available on SI page 56.

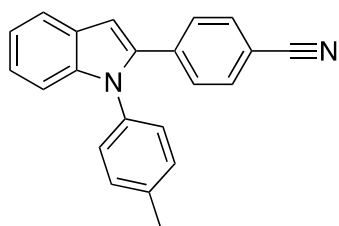

## 2h

In a reaction flask under Ar, **1h** (111 mg, mmol), p-toluidine (116 mg, 1.1 mmol), and DMSO (1.0 mL) were added. The reaction was started with the addition of KO<sup>t</sup>Bu (124 mg, 1.1 mmol). The reaction was stirred on an aluminum heating block at 100°C for 18 hr. The reaction was quenched by dilution with CH<sub>2</sub>Cl<sub>2</sub> and addition of NH<sub>4</sub>Cl. The layers were separated and the aqueous phase extracted with CH<sub>2</sub>Cl<sub>2</sub> (3 X 20 mL). The combined organic layers were washed with H<sub>2</sub>O (80 mL) and dried over Na<sub>2</sub>SO<sub>4</sub>. The solvent was removed under reduced pressure to give a brown solid. Purification by silica gel flash column chromatography (CH<sub>2</sub>Cl<sub>2</sub> → MeOH/CH<sub>2</sub>Cl<sub>2</sub>, 1/39, step gradient) gave 123 mg (0.4 mmol, 80 % yield) of product as an off-white solid. <sup>1</sup>H NMR (500 MHz, CDCl<sub>3</sub>): δ 7.72-7.68 (m, 3H), 7.38-7.34 (dt, *J* = 8.8 Hz, 2 Hz, 2H), 7.30-7.28 (m, 1H), 7.25-7.22 (m, 2H), 7.22-7.17 (m, 2H), 7.15-7.12 (m, 2H), 6.89 (d, *J* = 0.8 Hz), 2.42 (s,

3H).  $^{13}\text{C}$  NMR (126 MHz,  $\text{CDCl}_3$ ):  $\delta$  168.9, 139.5, 137.4, 136.3, 135.6, 131.6, 130.1, 128.7, 128.0, 127.7, 127.7, 122.9, 120.8, 120.7, 110.8, 104.5, 21.2. TLC:  $R_f$  = 0.1 ( $\text{CH}_2\text{Cl}_2$ ), 0.4 ( $\text{MeOH}/\text{CH}_2\text{Cl}_2$ , 1/39). IR (ATR): 3480 (m), 3365 (w), 3149 (s), 2922 (w), 1905 (w), 1793 (w), 1680 (s), 1663 (s), 1605 (s), 1563 (m), 1541 (w), 1535 (w), 1472 (w), 1453 (m), 1411 (w), 1380 (s), 1352 (m), 1321 (m), 1282 (m), 1259 (m), 1210 (m), 1139 (m), 1106 (m), 1017 (m). HRMS (DART): calculated for  $[\text{C}_{22}\text{H}_{16}\text{N}_2\text{H}]^+$  309.1386, measured 309.1380.  $^1\text{H}$  and  $^{13}\text{C}$  NMR spectra available on SI page 57.

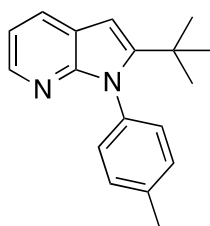

## 2j

In a reaction flask under Ar, **1j** (89 mg, 0.5 mmol), p-toluidine (118 mg, mmol), and DMSO (1.0 mL) were added. The reaction was started with the addition of KOtBu (123 mg, 1.1 mmol). The reaction was stirred on an aluminum heating block at 100°C for 18 hr. The reaction was quenched by dilution with  $\text{CH}_2\text{Cl}_2$  and addition of  $\text{NH}_4\text{Cl}$ . The layers were separated and the aqueous phase extracted with  $\text{CH}_2\text{Cl}_2$  (3 X 20 mL). The combined organic layers were washed with  $\text{H}_2\text{O}$  (80 mL) and dried over  $\text{Na}_2\text{SO}_4$ . The solvent was removed under reduced pressure to give a brown solid. Purification by silica gel flash column chromatography (hexanes  $\rightarrow$   $\text{CH}_2\text{Cl}_2$ , step gradient) gave 90 mg (0.34 mmol, 68 % yield) of product as a brown solid.  $^1\text{H}$  NMR (500 MHz,  $\text{CDCl}_3$ ):  $\delta$  8.22-8.19 (dd,  $J$  = 4.7 Hz, 1.5 Hz, 1H), 7.86-7.83 (dd,  $J$  = 7.8 Hz, 1.5 Hz, 1H), 7.34-7.31 (d,  $J$  = 2Hz, 2H), 7.29-7.25 (m, 2H), 7.04-7.00 (dd,  $J$  = 8 Hz, 4.5 Hz, 1H), 6.41 (s, 1H), 2.46 (s, 3H), 1.29 (s, 9H).  $^{13}\text{C}$  NMR (126 MHz,  $\text{CDCl}_3$ ):  $\delta$  151.6, 151.2, 142.8, 138.7, 136.2, 130.5, 129.7, 127.3, 119.5, 116.0, 96.9, 33.5, 30.7, 21.4. TLC:  $R_f$  = 0.6 ( $\text{CH}_2\text{Cl}_2$ ), 0.7 ( $\text{MeOH}/\text{CH}_2\text{Cl}_2$ , 1/19), 0.2 ( $\text{CH}_2\text{Cl}_2$ /hexanes, 1/1). IR (ATR): 3041 (m), 2958 (s), 2924 (s), 2869 (s), 1593 (m), 1574 (m), 1525 (s), 1515 (s), 1470 (m), 14010 (s), 1393 (m), 1361 (s), 1311 (s), 1285 (s), 1246 (s), 1216 (m), 1199 (m), 1132 (w), 1107 (m), 1041 (w), 1023 (w). HRMS (DART): calculated for  $[\text{C}_{18}\text{H}_{20}\text{N}_2\text{H}]^+$  265.1705, measured 265.1703.  $^1\text{H}$  and  $^{13}\text{C}$  NMR spectra available on SI page 58.

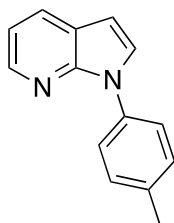

## 2k

In a reaction flask under Ar, **1k** (61 mg, 0.5 mmol), p-toluidine (118 mg, 1.1 mmol), and DMSO (1.0 mL) were added. The reaction was started with the addition of KOtBu (123 mg, 1.1 mmol). The reaction was stirred on an aluminum heating block at 80°C for 48 hr.

The reaction was quenched by dilution with CH<sub>2</sub>Cl<sub>2</sub> and addition of NH<sub>4</sub>Cl. The layers were separated and the aqueous phase extracted with CH<sub>2</sub>Cl<sub>2</sub> (3 X 20 mL). The combined organic layers were washed with H<sub>2</sub>O (80 mL) and dried over Na<sub>2</sub>SO<sub>4</sub>. The solvent was removed under reduced pressure to give a brown solid. Purification by silica gel flash column chromatography (hexanes → CH<sub>2</sub>Cl<sub>2</sub>/hexanes 1/1, step gradient) gave 53 mg (0.26 mmol, 51 % yield) of product as a brown solid. <sup>1</sup>H NMR (500 MHz, CDCl<sub>3</sub>): δ 8.39-8.36 (d, *J* = 4.5 Hz, 1H), 7.99-7.96 (d, *J* = 9 Hz), 7.64-7.61 (d, *J* = 8 Hz, 2H), 7.51-7.48 (d, *J* = 3.5 Hz, 1H), 7.35-7.32 (d, *J* = 8.5 Hz, 2H), 7.15-7.11 (ddd, *J* = 8.0 Hz, 4.5 Hz, 0.7 Hz, 1H), 6.63-6.61 (dd, 3.8 Hz, 0.7 Hz, 1H), 2.43 (s, 3H). <sup>13</sup>C NMR (126 MHz, CDCl<sub>3</sub>): δ 143.5, 136.2, 135.9, 129.9, 128.0, 124.0, 116.5, 108.2, 107.7, 101.2, 21.0. TLC: *R<sub>f</sub>* = 0.8 (CH<sub>2</sub>Cl<sub>2</sub>), 0.4 (CH<sub>2</sub>Cl<sub>2</sub>/hexanes, 1/1). IR (ATR): 2923 (s), 1594 (s), 1530 (s), 1476 (m), 1424 (s), 1359 (m), 1323 (s), 1269 (m), 1235 (m), 1210 (w), 1147 (w), 1110 (m), 1039 (w). HRMS (DART): calculated for [C<sub>14</sub>H<sub>12</sub>N<sub>2</sub>H]<sup>+</sup> 209.1079, measured 209.1083. <sup>1</sup>H and <sup>13</sup>C NMR spectra available on SI page 59.

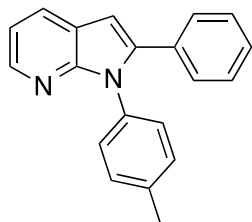

## 2l

In a reaction flask under Ar, **1l** (99 mg, 0.5 mmol), p-toluidine (118 mg, 1.1 mmol), and DMSO (1.0 mL) were added. The reaction was started with the addition of KO<sup>t</sup>Bu (124 mg, 1.1 mmol). The reaction was stirred on an aluminum heating block at 100°C for 18 hr. The reaction was quenched by dilution with CH<sub>2</sub>Cl<sub>2</sub> and addition of NH<sub>4</sub>Cl. The layers were separated and the aqueous phase extracted with CH<sub>2</sub>Cl<sub>2</sub> (3 X 20 mL). The combined organic layers were washed with H<sub>2</sub>O (80 mL) and dried over Na<sub>2</sub>SO<sub>4</sub>. The solvent was removed under reduced pressure to give a brown solid. Purification by silica gel flash column chromatography (hexanes → CH<sub>2</sub>Cl<sub>2</sub>, step gradient) gave 111 mg (0.39 mmol, 78 % yield) of product as a yellow solid. <sup>1</sup>H NMR (500 MHz, CDCl<sub>3</sub>): δ 8.36-8.33 (dd, *J* = 4.5 Hz, 1.6 Hz, 1H), 7.99-7.96 (dd, *J* = 8.0 Hz, 1.7 Hz, 1H), 7.35-7.27 (m, 5H), 7.26-7.21 (m, 4H), 7.15-7.12 (dd, 8.0 Hz, 4.8 Hz, 1H), 6.74 (s, 1H), 2.40 (s, 3H). <sup>13</sup>C NMR (126 MHz, CDCl<sub>3</sub>): δ 150.0, 143.7, 141.1, 137.1, 134.3, 132.2, 129.7, 128.8, 128.3, 128.2, 128.1, 127.7, 120.8, 116.9, 101.1, 21.2. TLC: *R<sub>f</sub>* = 0.7 (CH<sub>2</sub>Cl<sub>2</sub>), 0.4 (EtOAc/hexanes, 1/9). IR (ATR): 3058 (w), 3034 (w), 2917 (w), 1920 (w), 1884 (w), 1845 (w), 1734 (w), 1699 (w), 1675 (w), 1604 (w), 1589 (m), 1567 (m), 1541 (m), 1512 (s), 1489 (w), 1473 (m), 1447 (w), 1417 (s), 1371 (s), 1315 (m), 1297 (m), 1277 (m), 1241 (m), 1211 (w), 1195 (w), 1183 (m), 1108 (m), 1073 (w), 1028 (m). HRMS (DART): calculated for [C<sub>20</sub>H<sub>16</sub>N<sub>2</sub>H]<sup>+</sup> 285.1386, measured 285.1396. <sup>1</sup>H and <sup>13</sup>C NMR spectra available on SI page 60.

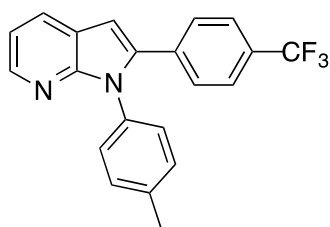

## 2m

In a reaction flask under Ar, **1m** (133 mg, 0.5 mmol), p-toluidine (118 mg, 1.1 mmol), and DMSO (1.0 mL) were added. The reaction was started with the addition of KO<sup>t</sup>Bu (124 mg, 1.1 mmol). The reaction was stirred on an aluminum heating block at 100°C for 18 hr. The reaction was quenched by dilution with CH<sub>2</sub>Cl<sub>2</sub> and addition of NH<sub>4</sub>Cl. The layers were separated and the aqueous phase extracted with CH<sub>2</sub>Cl<sub>2</sub> (3 X 20 mL). The combined organic layers were washed with H<sub>2</sub>O (80 mL) and dried over Na<sub>2</sub>SO<sub>4</sub>. The solvent was removed under reduced pressure to give a brown solid. Purification by silica gel flash column chromatography (hexanes → EtOAc/hexanes, 1/9, step gradient) gave 148 mg (0.42 mmol, 84 % yield) of product as a brown solid. <sup>1</sup>H NMR (500 MHz, CDCl<sub>3</sub>): δ 8.39-8.36 (dd, *J* = 4.6 Hz, 1.6 Hz, 1H), 8.02-7.98 (dd, *J* = 8.0 Hz, 1.6 Hz, 1H), 7.56-7.53 (d, *J* = 8.0 Hz, 2H), 7.45-7.41 (d, *J* = 8.0 Hz, 2H), 7.28-7.25 (d, *J* = 8.0 Hz, 2H), 7.23-7.19 (dt, *J* = 9.0 Hz, 2.2 Hz, 2H), 7.18-7.14 (dd, *J* = 7.5 Hz, 4.8 Hz, 1H), 6.81 (s, 1H), 2.41 (s, 3H). <sup>13</sup>C NMR (126 MHz, CDCl<sub>3</sub>): δ 150.3, 144.3, 139.3, 137.7, 135.7, 134.0, 130.0, 129.6, 129.4, 128.9, 128.8, 128.1, 125.2 (q, *J* = 3.8 Hz), 120.6, 117.2, 102.4, 21.2. TLC: *R<sub>f</sub>* = 0.8 (CH<sub>2</sub>Cl<sub>2</sub>), 0.4 (EtOAc/hexanes, 1/9). IR (ATR): 3006 (w), 2990 (w), 1844 (w), 1738 (w), 1716 (w), 1699 (w), 1674 (w), 1617 (w), 1555 (w), 1542 (w), 1513 (w), 1501 (w), 1473 (w), 1456 (w), 1403 (w), 1325 (s), 1275 (s), 1260 (s), 1160 (s), 1122 (s), 1109 (s), 1084 (m), 1063 (m), 1018 (m). HRMS (DART): calculated for [C<sub>21</sub>H<sub>15</sub>F<sub>3</sub>NH]<sup>+</sup> 353.1260, measured 353.1239. <sup>1</sup>H and <sup>13</sup>C NMR spectra available on SI page 61.

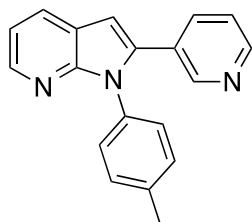

## 2n

In a reaction flask under Ar, **1n** (99 mg, 0.5 mmol), p-toluidine (118 mg, 1.1 mmol), and DMSO (1.0 mL) were added. The reaction was started with the addition of KO<sup>t</sup>Bu (124 mg, 1.1 mmol). The reaction was stirred on an aluminum heating block at 100°C for 18 hr. The reaction was quenched by dilution with CH<sub>2</sub>Cl<sub>2</sub> and addition of NH<sub>4</sub>Cl. The layers were separated and the aqueous phase extracted with CH<sub>2</sub>Cl<sub>2</sub> (3 X 20 mL). The combined organic layers were washed with H<sub>2</sub>O (80 mL) and dried over Na<sub>2</sub>SO<sub>4</sub>. The solvent was removed under reduced pressure to give a brown solid. Purification by silica gel flash column chromatography (CH<sub>2</sub>Cl<sub>2</sub> → MeOH/CH<sub>2</sub>Cl<sub>2</sub>, 1/9, step gradient) gave 125 mg (0.44 mmol, 88 % yield) of product as a brown solid. <sup>1</sup>H NMR (500 MHz,

CDCl<sub>3</sub>):  $\delta$  8.66 (s, 1H), 8.51 (s, 1H), 8.37-8.35 (dd,  $J$  = 4.5 Hz, 1.5 Hz, 1H), 8.01-7.98 (dd,  $J$  = 8.0 Hz, 1.5 Hz, 1H), 7.53-7.49 (dt,  $J$  = 8.0 Hz, 2.0 Hz, 1H), 7.26-7.23 (d,  $J$  = 8.0 Hz, 2.0 Hz, 1H), 7.22-7.17 (m, 3H), 7.17-7.14 (dd,  $J$  = 7.8 Hz, 4.5 Hz, 1H), 6.8 (s, 1H), 2.39 (s, 3H). <sup>13</sup>C NMR (126 MHz, CDCl<sub>3</sub>):  $\delta$  150.2, 149.5, 148.7, 144.3, 137.8, 137.4, 135.8, 133.8, 130.0, 128.7, 128.1, 123.0, 120.5, 117.2, 109.8, 101.9, 21.2. TLC:  $R_f$  = 0.1 (CH<sub>2</sub>Cl<sub>2</sub>), 0.2 (MeOH/CH<sub>2</sub>Cl<sub>2</sub>, 1/19). IR (ATR): 3037 (m), 2923 (m), 2855 (m), 1897 (w), 1693 (m), 1592 (m), 1567 (m), 1512 (s), 1462 (m), 1430 (s), 1403 (s), 1371 (m), 1316 (s), 1294 (s), 1247 (m), 1211 (w), 1178 (m), 1110 (m), 1023 (m). HRMS (DART): calculated for [C<sub>19</sub>H<sub>15</sub>N<sub>3</sub>H]<sup>+</sup> 286.1344, measured 286.1344. <sup>1</sup>H and <sup>13</sup>C NMR spectra available on SI page 62.

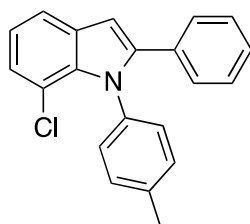

## 2o

In a reaction flask under Ar, **1o** (115 mg, 0.5 mmol), p-toluidine (117 mg, 1.1 mmol), and DMSO (1.0 mL) were added. The reaction was started with the addition of KO<sup>t</sup>Bu (125 mg, 1.1 mmol). The reaction was stirred on an aluminum heating block at 100°C for 18 hr. The reaction was quenched by dilution with ethyl acetate and addition of NH<sub>4</sub>Cl. The layers were separated and the aqueous phase extracted with ethyl acetate (3 X 20 mL). The combined organic layers were washed with H<sub>2</sub>O (80 mL) and dried over Na<sub>2</sub>SO<sub>4</sub>. The solvent was removed under reduced pressure to give a brown oil. Purification by silica gel flash column chromatography (hexanes → CH<sub>2</sub>Cl<sub>2</sub>/hexanes, 1/4, step gradient) gave 116 mg (0.37 mmol, 73 % yield) of product as a white solid. <sup>1</sup>H NMR (500 MHz, CDCl<sub>3</sub>):  $\delta$  7.65-7.62 (dd,  $J$  = 7.8 Hz, 1.1 Hz, 1H), 7.32-7.25 (m, 5H), 7.25-7.21 (dt,  $J$  = 8.5 Hz, 2.0 Hz, 2H), 7.21-7.19 (dd,  $J$  = 7.7 Hz, 1.1 Hz, 1H), 7.18-7.15 (m, 2H), 7.14-7.10 (t,  $J$  = 7.8 Hz, 1H), 6.8 (s, 1H), 2.43 (s, 3H). <sup>13</sup>C NMR (126 MHz, CDCl<sub>3</sub>):  $\delta$  143.3, 138.1, 136.2, 134.0, 132.4, 130.9, 130.3, 129.5, 128.7, 128.0, 127.6, 124.0, 120.8, 119.3, 117.4, 103.5, 21.3. TLC:  $R_f$  = 0.6 (hexanes). IR (ATR): 3064 (w), 3038 (w), 2924 (m), 2853 (w), 1897 (w), 1785 (w), 1609 (m), 1581 (m), 1513 (w), 1491 (m), 1470 (s), 1456 (m), 1443 (m), 1422 (s), 1377 (w), 1351 (w), 1322 (w), 1289 (s), 1272 (w), 1256 (w), 1236 (m), 1206 (w), 1192 (m), 1169 (m), 1143 (s), 1107 (w), 1097 (w), 1071 (w), 1050 (w), 1038 (m), 1020 (s). HRMS (DART): calculated for [C<sub>21</sub>H<sub>16</sub>ClNH]<sup>+</sup> 318.1044, measured 318.1045. <sup>1</sup>H and <sup>13</sup>C NMR spectra available on SI page 63.

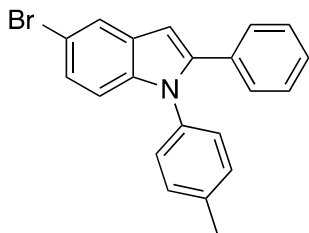

## 2p

In a reaction flask under Ar, **1p** (137 mg, 0.5 mmol), p-toluidine (118 mg, 1.1 mmol), and DMSO (1.0 mL) were added. The reaction was started with the addition of KO<sup>t</sup>Bu (124 mg, 1.1 mmol). The reaction was stirred on an aluminum heating block at 100°C for 18 hr. The reaction was quenched by dilution with ethyl acetate and addition of NH<sub>4</sub>Cl. The layers were separated and the aqueous phase extracted with ethyl acetate (3 X 20 mL). The combined organic layers were washed with H<sub>2</sub>O (80 mL) and dried over Na<sub>2</sub>SO<sub>4</sub>. The solvent was removed under reduced pressure to give a brown oil. Purification by silica gel flash column chromatography (hexanes → CH<sub>2</sub>Cl<sub>2</sub>/hexanes, 1/4, step gradient) gave 137 mg (0.38 mmol, 76 % yield) of product as a white solid. <sup>1</sup>H NMR (500 MHz, CDCl<sub>3</sub>): δ 7.83-7.81 (d, *J* = 1.8 Hz, 1H), 7.31-7.22 (m, 8H), 7.16-7.11 (m, 3H), 6.74 (d, *J* = 0.6 Hz, 1H), 2.43 (s, 3H). <sup>13</sup>C NMR (126 MHz, CDCl<sub>3</sub>): δ 141.9, 137.5, 135.4, 132.1, 130.0, 129.8, 128.9, 128.2, 127.7, 127.6, 124.9, 122.8, 113.6, 112.2, 102.6, 21.2. TLC: R<sub>f</sub> = 0.4 (hexanes). IR (ATR): 3033 (m), 2923 (s), 2855 (m), 1902 (w), 1602 (m), 1514 (s), 1486 (m), 1456 (s), 1441 (s), 1378 (s), 1324 (m), 1302 (w), 1285 (w), 1255 (w), 1204 (m), 1170 (m), 1109 (w), 1077 (w), 1052 (m), 1029 (m). HRMS (DART): calculated for [C<sub>21</sub>H<sub>16</sub>BrNH]<sup>+</sup> 362.0539, measured 362.0538. <sup>1</sup>H and <sup>13</sup>C NMR spectra available on SI page 64.

## Synthesis of benzofurans (3a-g)

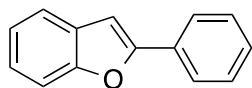

**3a**

In a reaction flask under Ar, **1a** (98 mg, 0.5 mmol), and DMSO (1.0 mL) were added. The reaction was started with the addition of NaOH (25 mg, 0.6 mmol). The reaction was stirred on an aluminum heating block at 100°C for 18 hr. The reaction was quenched by dilution with CH<sub>2</sub>Cl<sub>2</sub> and addition of NH<sub>4</sub>Cl. The layers were separated and the aqueous phase extracted with CH<sub>2</sub>Cl<sub>2</sub> (3 X 20 mL). The combined organic layers were washed with H<sub>2</sub>O (80 mL) and dried over Na<sub>2</sub>SO<sub>4</sub>. The solvent was removed under reduced pressure to give a brown solid. Purification by silica gel flash column chromatography (hexanes) gave 89 mg (0.46 mmol, 92 % yield) of product as a white solid. <sup>1</sup>H NMR (500 MHz, CDCl<sub>3</sub>): δ 7.94-7.91 (m, 2H), 7.65-7.62 (ddd, *J* = 7.7 Hz, 1.4 Hz, 0.7 Hz, 1H), 7.60-7.57 (dq, *J* = 8.0 Hz, 0.8 Hz, 1H), 7.52-7.47 (m, 2H), 7.43-7.38 (tt, *J* = 7.4 Hz, 1.3 Hz, 1H), 7.37-7.32 (m, 1H), 7.31-7.27 (m, 1H), 7.07-7.06 (d, *J* = 1.0 Hz, 1H). <sup>13</sup>C NMR (126 MHz, CDCl<sub>3</sub>): δ 155.9, 154.9, 130.5, 129.2, 128.8, 128.6, 124.9, 124.3, 123.0, 120.9, 111.2, 101.2. TLC: *R<sub>f</sub>* = 0.5 (hexanes). IR (ATR): 3034 (m), 1896 (w), 1673 (w), 1604 (w), 1587 (w), 1561 (m), 1490 (m), 1470 (m), 1455 (s), 1440 (s), 1350 (w), 1333 (w), 1321 (w), 1304 (w), 1295 (w), 1272 (w), 1257 (m), 1207 (m), 1168 (m), 1105 (m), 1073 (m), 1038 (m), 1019 (m). HRMS (DART): calculated for [C<sub>14</sub>H<sub>10</sub>OH]<sup>+</sup> 195.0804, measured 195.0776. <sup>1</sup>H and <sup>13</sup>C NMR spectra available on SI page 65.

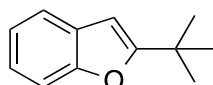

**3b**

In a reaction flask under Ar, **1i** (88 mg, 0.5 mmol), and DMSO (1.0 mL) were added. The reaction was started with the addition of NaOH (24 mg, 0.6 mmol). The reaction was stirred on an aluminum heating block at 150°C for 72 hr. The reaction was quenched by dilution with CH<sub>2</sub>Cl<sub>2</sub> and addition of NH<sub>4</sub>Cl. The layers were separated and the aqueous phase extracted with CH<sub>2</sub>Cl<sub>2</sub> (3 X 20 mL). The combined organic layers were washed with H<sub>2</sub>O (80 mL) and dried over Na<sub>2</sub>SO<sub>4</sub>. The solvent was removed under reduced pressure to give a brown oil. Purification by silica gel flash column chromatography (hexanes) gave 77 mg (0.45 mmol, 89 % yield) of product as a white solid. <sup>1</sup>H NMR (500 MHz, CDCl<sub>3</sub>): δ 7.51-7.48 (m, 1H), 7.45-7.42 (m, 1H), 7.24-7.16 (m, 2H), 6.37-6.36 (d, *J* = 0.9 Hz, 1H), 1.39 (s, 9H). <sup>13</sup>C NMR (126 MHz, CDCl<sub>3</sub>): δ 167.4, 154.6, 128.9, 123.0, 122.2, 120.3, 110.8, 98.9, 33.0, 28.9. TLC: *R<sub>f</sub>* = 0.7 (hexanes). IR (ATR): 2924 (s), 2854 (m), 1844 (w), 1734 (m), 1716 (m), 1699 (s), 1674 (m), 1647 (w), 1555 (m), 1523 (s), 1498 (m), 1456 (m), 1260 (m). HRMS (DART): calculated for [C<sub>12</sub>H<sub>14</sub>OH]<sup>+</sup> 175.1117, measured 175.1115. <sup>1</sup>H and <sup>13</sup>C NMR spectra available on SI page 66.



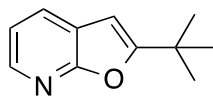

**3d**

In a reaction flask under Ar, **1j** (89 mg, 0.5 mmol), and DMSO (1.0 mL) were added. The reaction was started with the addition of NaOH (27 mg, 0.6 mmol). The reaction was stirred on an aluminum heating block at 100°C for 18 hr. The reaction was quenched by dilution with CH<sub>2</sub>Cl<sub>2</sub> and addition of NH<sub>4</sub>Cl. The layers were separated and the aqueous phase extracted with CH<sub>2</sub>Cl<sub>2</sub> (3 X 20 mL). The combined organic layers were washed with H<sub>2</sub>O (80 mL) and dried over Na<sub>2</sub>SO<sub>4</sub>. The solvent was removed under reduced pressure to give a brown oil. Purification by silica gel flash column chromatography (hexanes → CH<sub>2</sub>Cl<sub>2</sub>/hexanes, 1/1, step gradient) gave 79 mg (0.40 mmol, 90 % yield) of product as a brown oil. <sup>1</sup>H NMR (500 MHz, CDCl<sub>3</sub>): δ 8.26-8.20 (d, *J* = 4.0 Hz, 1H), 7.82-7.79 (dd, *J* = 7.5 Hz, 1.7 Hz, 1H), 7.18-7.15 (dd, *J* = 7.5 Hz, 5.0 Hz, 1H), 6.37 (s, 1H), 1.41 (s, 9H). <sup>13</sup>C NMR (126 MHz, CDCl<sub>3</sub>): δ 167.3, 161.8, 142.7, 128.9, 121.1, 118.9, 98.1, 33.1, 28.6. TLC: *R*<sub>f</sub> = 0.7 (CH<sub>2</sub>Cl<sub>2</sub>), 0.3 (CH<sub>2</sub>Cl<sub>2</sub>/hexanes, 1/1). IR (ATR): 2926 (s), 1580 (s), 1460 (m), 1403 (s), 1364 (m), 1341 (m), 1286 (s), 1252 (s), 1224 (m), 1203 (s), 1166 (m), 1115 (m), 1086 (s). HRMS (DART): calculated for [C<sub>11</sub>H<sub>13</sub>NOH]<sup>+</sup> 176.1075, measured 176.1075. <sup>1</sup>H and <sup>13</sup>C NMR spectra available on SI page 67.

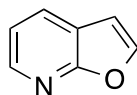

**3e**

In a reaction flask under Ar, **1k** (61 mg, 0.5 mmol), and DMSO (1.0 mL) were added. The reaction was started with the addition of NaOH (24 mg, 0.6 mmol). The reaction was stirred on an aluminum heating block at 80°C for 48 hr. The reaction was quenched by dilution with CH<sub>2</sub>Cl<sub>2</sub> and addition of NH<sub>4</sub>Cl. The layers were separated and the aqueous phase extracted with CH<sub>2</sub>Cl<sub>2</sub> (3 X 20 mL). The combined organic layers were washed with H<sub>2</sub>O (80 mL) and dried over Na<sub>2</sub>SO<sub>4</sub>. The solvent was removed under reduced pressure to give a brown oil. Purification by silica gel flash column chromatography (hexanes → CH<sub>2</sub>Cl<sub>2</sub>, step gradient) gave 37 mg (0.31 mmol, 61 % yield) of product as a yellow solid. <sup>1</sup>H NMR (500 MHz, CDCl<sub>3</sub>): δ 8.37-8.34 (dd, *J* = 5.0 Hz, 2.0 Hz, 1H), 7.98-7.95 (dd, *J* = 7.5 Hz, 1.5 Hz, 1H), 7.74-7.72 (d, *J* = 2.5 Hz, 1H), 7.27-7.23 (dd, *J* = 8.0 Hz, 4.5 Hz, 1H), 6.81-6.79 (d, *J* = 2.5 Hz, 1H). <sup>13</sup>C NMR (126 MHz, CDCl<sub>3</sub>): δ 162.0, 144.7, 144.2, 130.1, 119.2, 106.0, 103.8. TLC: *R*<sub>f</sub> = 0.6 (CH<sub>2</sub>Cl<sub>2</sub>). IR (ATR): 2923 (s), 2880 (m), 1288 (s), 1135 (s). HRMS (DART): calculated for [C<sub>11</sub>H<sub>13</sub>NOH]<sup>+</sup> 176.1070, measured 176.1070. <sup>1</sup>H and <sup>13</sup>C NMR spectra available on SI page 68.

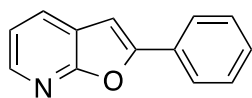

**3c**

In a reaction flask under Ar, **11** (99 mg, 0.5 mmol), and DMSO (1.0 mL) were added. The reaction was started with the addition of NaOH (25 mg, 0.6 mmol). The reaction was stirred on an aluminum heating block at 100°C for 18 hr. The reaction was quenched by dilution with CH<sub>2</sub>Cl<sub>2</sub> and addition of NH<sub>4</sub>Cl. The layers were separated and the aqueous phase extracted with CH<sub>2</sub>Cl<sub>2</sub> (3 X 20 mL). The combined organic layers were washed with H<sub>2</sub>O (80 mL) and dried over Na<sub>2</sub>SO<sub>4</sub>. The solvent was removed under reduced pressure to give a brown oil. Purification by silica gel flash column chromatography (hexanes → CH<sub>2</sub>Cl<sub>2</sub>, step gradient) gave 91 mg (0.47 mmol, 93 % yield) of product as a brown solid. <sup>1</sup>H NMR (500 MHz, CDCl<sub>3</sub>): δ 8.33-8.30 (dd, *J* = 5 Hz, 1.3 Hz, 1H), 7.95-7.91 (m, 3H), 7.51-7.46 (m, 2H), 7.43-7.39 (tt, *J* = 7.5 Hz, 1.3 Hz, 1H), 7.26-7.22 (dd, *J* = 8.0 Hz, 4.9 Hz, 1H), 7.03 (s, 1H). <sup>13</sup>C NMR (126 MHz, CDCl<sub>3</sub>): δ 161.9, 155.7, 143.9, 129.7, 129.5, 129.3, 128.9, 128.5, 125.2, 119.5, 100.0. TLC: *R*<sub>f</sub> = 0.6 (CH<sub>2</sub>Cl<sub>2</sub>). IR (ATR): 3056 (w), 2974 (m), 2927 (w), 1952 (w), 1888 (w), 1734 (w), 1688 (m), 1657 (m), 1596 (m), 1585 (m), 1562 (m), 1542 (w), 1535 (w), 1491 (m), 1471 (w), 1446 (m), 1431 (m), 1416 (w), 1401 (s), 1363 (m), 1334 (m), 1305 (w), 1297 (m), 1277 (w), 1243 (s), 1170 (s), 1112 (m), 1071 (w), 1037 (w), 1045 (w), 1020 (s), 1000 (w). HRMS (DART): calculated for [C<sub>13</sub>H<sub>9</sub>NOH]<sup>+</sup> 196.0757, measured 196.0732. <sup>1</sup>H and <sup>13</sup>C NMR spectra available on SI page 69.

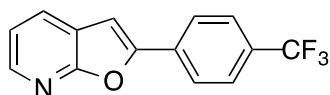

**3g**

In a reaction flask, **1s** (133 mg, 0.5 mmol), and H<sub>2</sub>O (1 mL) were added. The reaction was started with the addition of NaOH (59 mg, 1.5 mmol). The reaction was stirred on an aluminum heating block at 125°C for 48 hr. The reaction was quenched by dilution with ethyl acetate and addition of NH<sub>4</sub>Cl. The layers were separated and the aqueous phase extracted with ethyl acetate (3 X 20 mL). The combined organic layers were washed with H<sub>2</sub>O (80 mL) and dried over Na<sub>2</sub>SO<sub>4</sub>. The solvent was removed under reduced pressure to give a yellow oil. Purification by silica gel flash column chromatography (hexanes/CH<sub>2</sub>Cl<sub>2</sub>, 1:1 → CH<sub>2</sub>Cl<sub>2</sub>) gave 128 mg (0.49 mmol, 97 % yield) of product as a yellow oil. <sup>1</sup>H NMR (500 MHz, CDCl<sub>3</sub>): δ 8.37-8.35 (dd, *J* = 5 Hz, 1.5 Hz, 1H), 8.04-8.01 (d, *J* = 8.5 Hz, 2H), 7.98-7.95 (m, 1H), 7.76-7.72 (d, *J* = 8.5 Hz, 2H), 7.29-7.25 (m, 1H), 7.14 (s, 1H). <sup>13</sup>C NMR (126 MHz, CDCl<sub>3</sub>): δ 162.0, 153.9, 144.7, 130.1, 126.0-125.8 (q, *J* = 3.8 Hz), 125.3, 121.1, 119.8, 102.0, 29.7. TLC: *R*<sub>f</sub> = 0.6 (CH<sub>2</sub>Cl<sub>2</sub>). IR (ATR): 2924 (m), 2852 (m), 1930 (w), 1732 (m), 1615 (m), 1596 (s), 1562 (s), 1511 (w), 1456 (m), 1438 (s), 1415 (w), 1403 (m), 1324 (s), 1295 (s), 1255 (s), 1216 (s), 1186 (m), 1162 (s), 1128 (m), 1120 (s), 1067 (s), 1031 (w), 1014 (s). HRMS (DART): calculated for [C<sub>14</sub>H<sub>8</sub>F<sub>3</sub>NOH]<sup>+</sup> 264.0631, measured 264.0631. <sup>1</sup>H and <sup>13</sup>C NMR spectra available on SI page 70.

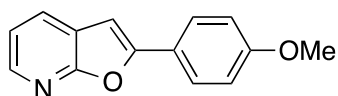

**3h**

In a reaction flask, **1s** (114 mg, 0.5 mmol), and H<sub>2</sub>O (1 mL) were added. The reaction was started with the addition of NaOH (60 mg, 1.5 mmol). The reaction was stirred on an aluminum heating block at 125°C for 48 hr. The reaction was quenched by dilution with ethyl acetate and addition of NH<sub>4</sub>Cl. The layers were separated and the aqueous phase extracted with ethyl acetate (3 X 20 mL). The combined organic layers were washed with H<sub>2</sub>O (80 mL) and dried over Na<sub>2</sub>SO<sub>4</sub>. The solvent was removed under reduced pressure to give a yellow oil. Purification by silica gel flash column chromatography (CH<sub>2</sub>Cl<sub>2</sub>) gave 107 mg (0.48 mmol, 95 % yield) of product as a yellow oil. <sup>1</sup>H NMR (500 MHz, CDCl<sub>3</sub>): δ 8.28-8.25 (dd, *J* = 4.8 Hz, 1.5 Hz, 1H), 7.89-7.84 (m, 3H), 7.3-7.19 (dd, *J* = 7 Hz, 5 Hz, 1H), 7.02-6.99 (m, 2H), 6.88 (s, 1H), 3.88 (s, 3H). <sup>13</sup>C NMR (126 MHz, CDCl<sub>3</sub>): δ 160.5, 155.8, 143.2, 141.2, 129.0, 126.7, 121.2, 119.4, 110.0, 98.3, 55.4. TLC: *R<sub>f</sub>* = 0.3 (CH<sub>2</sub>Cl<sub>2</sub>). IR (ATR): 2920 (s), 2855 (s), 1735 (s), 1615 (s), 1598 (s), 1507 (s), 1256 (s), 1037 (s). HRMS (DART): calculated for [C<sub>14</sub>H<sub>11</sub>NO<sub>2</sub>H]<sup>+</sup> 226.0863, measured 226.0864. <sup>1</sup>H and <sup>13</sup>C NMR spectra available on SI page 71.

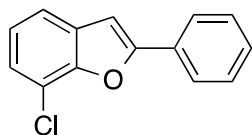

**3j**

In a reaction flask under Ar, **1o** (115 mg, 0.5 mmol), and DMSO (1.0 mL) were added. The reaction was started with the addition of NaOH (24 mg, 0.6 mmol). The reaction was stirred on an aluminum heating block at 100°C for 18 hr. The reaction was quenched by dilution with ethyl acetate and addition of NH<sub>4</sub>Cl. The layers were separated and the aqueous phase extracted with ethyl acetate (3 X 20 mL). The combined organic layers were washed with H<sub>2</sub>O (80 mL) and dried over Na<sub>2</sub>SO<sub>4</sub>. The solvent was removed under reduced pressure to give a brown oil. Purification by silica gel flash column chromatography (hexanes) gave 91 mg (0.40 mmol, 80 % yield) of product as a yellow solid. <sup>1</sup>H NMR (500 MHz, CDCl<sub>3</sub>): δ 7.94-7.90 (m, 2H), 7.50-7.46 (m, 3H), 7.43-7.38 (tt, *J* = 7.5 Hz, 2 Hz, 1H), 7.32-7.29 (dd, *J* = 7.8 Hz, 0.9 Hz, 1H), 7.20-7.15 (t, *J* = 7.8 Hz, 1H), 7.04 (s, 1H). <sup>13</sup>C NMR (126 MHz, CDCl<sub>3</sub>): δ 156.8, 150.6, 130.8, 129.8, 129.0, 128.8, 125.1, 124.4, 123.8, 119.4, 116.6, 101.7. TLC: *R<sub>f</sub>* = 0.5 (hexanes). IR (ATR): 3063 (w), 1609 (m), 1580 (m), 1491 (m), 1470 (s), 1447 (w), 1422 (s), 1351 (w), 1322 (w), 1288 (s), 1236 (s), 1192 (m), 1170 (s), 1143 (s), 1097 (w), 1071 (w), 1050 (w), 1038 (m), 1020 (s). HRMS (DART): calculated for [C<sub>14</sub>H<sub>9</sub>ClOH]<sup>+</sup> 229.0420, measured 229.0428. <sup>1</sup>H and <sup>13</sup>C NMR spectra available on SI page 72.

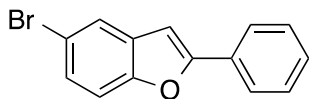

### 3k

In a reaction flask under Ar, **1p** (137 mg, 0.5 mmol), and DMSO (1.0 mL) were added. The reaction was started with the addition of NaOH (25 mg, 0.6 mmol). The reaction was stirred on an aluminum heating block at 100°C for 18 hr. The reaction was quenched by dilution with ethyl acetate and addition of NH<sub>4</sub>Cl. The layers were separated and the aqueous phase extracted with ethyl acetate (3 X 20 mL). The combined organic layers were washed with H<sub>2</sub>O (80 mL) and dried over Na<sub>2</sub>SO<sub>4</sub>. The solvent was removed under reduced pressure to give a brown oil. Purification by silica gel flash column chromatography (hexanes) gave 112 mg (0.41 mmol, 82 % yield) of product as a yellow solid. <sup>1</sup>H NMR (500 MHz, CDCl<sub>3</sub>): δ 7.89-7.85 (m, 2H), 7.73-7.71 (m, 2H), 7.51-7.46 (m, 2H), 7.45-7.37 (m, 3H), 6.96 (s, 1H). <sup>13</sup>C NMR (126 MHz, CDCl<sub>3</sub>): δ 157.2, 153.6, 131.2, 129.9, 129.0, 128.8, 127.1, 125.1, 123.5, 112.6, 100.7. TLC: R<sub>f</sub> = 0.3 (hexanes). IR (ATR): 3091 (w), 3060 (w), 3030 (w), 2926 (w), 2601 (w), 2545 (w), 2237 (w), 2079 (w), 1959 (w), 1889 (w), 1871 (w), 1831 (w), 1740 (w), 1684 (w), 1604 (m), 1577 (s), 1490 (m), 1449 (s), 1437 (s), 1428 (s), 1326 (m), 1275 (m), 1260 (s), 1206 (m), 1156 (m), 1116 (m), 1072 (m), 1050 (s), 1037 (s), 1020 (m), 1001 (w). HRMS (DART): calculated for [C<sub>14</sub>H<sub>9</sub>BrOH]<sup>+</sup> 272.9910, measured 272.9921. <sup>1</sup>H and <sup>13</sup>C NMR spectra available on SI page 73.

## Synthesis of N-H indoles (4a-g)

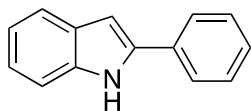

**4a**

In a reaction flask under Ar, **1a** (98 mg, 0.5 mmol), acetamide (65 mg, 1.1 mmol), and DMSO (1.0 mL) were added. The reaction was started with the addition of KO<sup>t</sup>Bu (124 mg, 1.1 mmol). The reaction was stirred on an aluminum heating block at 100°C for 18 hr. The reaction was quenched by dilution with CH<sub>2</sub>Cl<sub>2</sub> and addition of NH<sub>4</sub>Cl. The layers were separated and the aqueous phase extracted with CH<sub>2</sub>Cl<sub>2</sub> (3 X 20 mL). The combined organic layers were washed with H<sub>2</sub>O (80 mL) and dried over Na<sub>2</sub>SO<sub>4</sub>. The solvent was removed under reduced pressure to give a brown oil. Purification by silica gel flash column chromatography (hexanes → CH<sub>2</sub>Cl<sub>2</sub>/hexanes, 1/1, step gradient) gave 66 mg (0.34 mmol, 68 % yield) of product as a yellow solid. <sup>1</sup>H NMR (500 MHz, CDCl<sub>3</sub>): δ 8.34 (s, 1H), 7.71-7.63 (m, 3H), 7.49-7.41 (m, 3H), 7.37-7.32 (tt, *J* = 7.5 Hz, 1.0 Hz, 1H), 7.24-7.19 (m, 1H), 7.16-7.12 (m, 1H), 6.86-6.85 (dd, *J* = 2.0 Hz, 1.0 Hz, 1H). <sup>13</sup>C NMR (126 MHz, CDCl<sub>3</sub>): δ 137.9, 136.8, 132.4, 129.3, 129.0, 127.7, 125.1, 122.3, 120.7, 120.3, 101.8, 100.0. TLC: *R*<sub>f</sub> = 0.9 (CH<sub>2</sub>Cl<sub>2</sub>), 0.5 (EtOAc/hexanes, 1/9). IR (ATR): 3445 (s), 3050 (m), 2924 (m), 2853 (m), 1891 (w), 1686 (m), 1616 (m), 1542 (w), 1481 (m), 1457 (s), 1447 (s), 1403 (m), 1352 (m), 1339 (w), 1299 (s), 1241 (w), 1189 (w), 1148 (w), 1114 (w), 1074 (w), 1050 (w), 1028 (w). HRMS (DART): calculated for [C<sub>14</sub>H<sub>11</sub>NH]<sup>+</sup> 194.0964, measured 194.0965. <sup>1</sup>H and <sup>13</sup>C NMR spectra available on SI page 74.

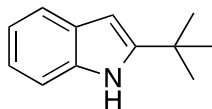

**4b**

In a reaction flask under Ar, **1i** (88 mg, 0.5 mmol), acetamide (65, 1.1 mmol), and DMSO (1.0 mL) were added. The reaction was started with the addition of KO<sup>t</sup>Bu (123 mg, 1.1 mmol). The reaction was stirred on an aluminum heating block at 150°C for 48 hr. The reaction was quenched by dilution with CH<sub>2</sub>Cl<sub>2</sub> and addition of NH<sub>4</sub>Cl. The layers were separated and the aqueous phase extracted with CH<sub>2</sub>Cl<sub>2</sub> (3 X 20 mL). The combined organic layers were washed with H<sub>2</sub>O (80 mL) and dried over Na<sub>2</sub>SO<sub>4</sub>. The solvent was removed under reduced pressure to give a brown oil. Purification by silica gel flash column chromatography (hexanes → CH<sub>2</sub>Cl<sub>2</sub>/hexanes, 1/1, step gradient) gave 44 mg (0.26 mmol, 51 % yield) of product as a white solid. <sup>1</sup>H NMR (500 MHz, CDCl<sub>3</sub>): δ 7.95 (s, 1H), 7.57-7.54 (m, 1H), 7.35-7.32 (m, 1H), 7.16-7.12 (m, 1H), 7.11-7.06 (m, 1H), 6.29-6.27 (dd, *J* = 2.5 Hz, 1.0 Hz, 1H), 1.42 (s, 9H). <sup>13</sup>C NMR (126 MHz, CDCl<sub>3</sub>): δ 148.7, 135.7, 128.5, 121.1, 120.0, 119.6, 110.3, 97.0, 31.8, 30.3. TLC: *R*<sub>f</sub> = 0.9 (CH<sub>2</sub>Cl<sub>2</sub>), 0.6 (EtOAc/hexanes, 1/9). IR (ATR): 3406 (s), 2957 (s), 2925 (s), 2863 (m), 1702 (w), 1612 (w), 1582 (w), 1542 (m), 1488 (w), 1458 (s), 1407 (s), 1394 (m), 1365 (s), 1348 (s), 1290 (s), 1246 (w), 1231 (w), 1202 (w), 1189 (w), 1148 (w), 1116 (w), 1012 (s). HRMS

(DART): calculated for  $[C_{12}H_{15}NH]^+$  174.1277, measured 174.1277.  $^1H$  and  $^{13}C$  NMR spectra available on SI page 75.

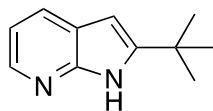

**4d**

In a reaction flask under Ar, **1j** (89 mg, 0.5 mmol), acetamide (65 mg, 1.1 mmol), and DMSO (1.0 mL) were added. The reaction was started with the addition of KO $t$ Bu (123 mg, 1.1 mmol). The reaction was stirred on an aluminum heating block at 100°C for 18 hr. The reaction was quenched by dilution with CH<sub>2</sub>Cl<sub>2</sub> and addition of NH<sub>4</sub>Cl. The layers were separated and the aqueous phase extracted with CH<sub>2</sub>Cl<sub>2</sub> (3 X 20 mL). The combined organic layers were washed with H<sub>2</sub>O (80 mL) and dried over Na<sub>2</sub>SO<sub>4</sub>. The solvent was removed under reduced pressure to give a brown oil. Purification by silica gel flash column chromatography (CH<sub>2</sub>Cl<sub>2</sub> → MeOH/CH<sub>2</sub>Cl<sub>2</sub>, 2/23, step gradient) gave 58 mg (0.34 mmol, 67 % yield) of product as a yellow solid.  $^1H$  NMR (500 MHz, CDCl<sub>3</sub>):  $\delta$  10.76 (s, 1H), 8.28-8.26 (dd,  $J$  = 5.0 Hz, 1.5 Hz, 1H), 7.87-7.83 (ddd,  $J$  = 7.5 Hz, 1.5 Hz, 0.5 Hz, 1H), 7.07-7.03 (dd,  $J$  = 7.5 Hz, 5.0 Hz, 1H), 6.23-6.21 (d,  $J$  = 2.5 Hz, 1H), 1.48 (s, 9H).  $^{13}C$  NMR (126 MHz, CDCl<sub>3</sub>):  $\delta$  150.2, 149.1, 141.4, 127.9, 127.7, 121.2, 94.7, 32.2, 30.1. TLC:  $R_f$  = 0.1 (MeOH/CH<sub>2</sub>Cl<sub>2</sub>, 1/19), 0.5 (MeOH/CH<sub>2</sub>Cl<sub>2</sub>, 2/23). IR (ATR): 3157 (m), 3088 (m), 2964 (s), 2869 (m), 1647 (m), 1605 (m), 1588 (s), 1540 (m), 1494 (w), 1417 (s), 1363 (s), 1326 (m), 1276 (s), 1226 (w), 1173 (s), 1109 (w), 1027 (w). HRMS (DART): calculated for  $[C_{11}H_{14}N_2H]^+$  175.1235, measured 175.1236.  $^1H$  and  $^{13}C$  NMR spectra available on SI page 76.

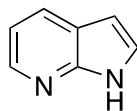

**4e**

In a reaction flask under Ar, **1k** (61 mg, 0.5 mmol), acetamide (66 mg, 1.1 mmol), and DMSO (1.0 mL) were added. The reaction was started with the addition of KO $t$ Bu (124 mg, 1.1 mmol). The reaction was stirred on an aluminum heating block at 80°C for 48 hr. The reaction was quenched by dilution with CH<sub>2</sub>Cl<sub>2</sub> and addition of NH<sub>4</sub>Cl. The layers were separated and the aqueous phase extracted with CH<sub>2</sub>Cl<sub>2</sub> (3 X 20 mL). The combined organic layers were washed with H<sub>2</sub>O (80 mL) and dried over Na<sub>2</sub>SO<sub>4</sub>. The solvent was removed under reduced pressure to give a brown oil. Purification by silica gel flash column chromatography (CH<sub>2</sub>Cl<sub>2</sub> → MeOH/CH<sub>2</sub>Cl<sub>2</sub>, 2/23, step gradient) gave 31 mg (0.26 mmol, 52 % yield) of product as a yellow solid.  $^1H$  NMR (500 MHz, CDCl<sub>3</sub>):  $\delta$  9.49 (s, 1H), 8.36-8.30 (dd,  $J$  = 5.0 Hz, 1.3 Hz, 1H), 7.98-7.95 (dd,  $J$  = 8.0 Hz, 1.5 Hz, 1H), 7.36-7.33 (dd,  $J$  = 3.5 Hz, 1.5 Hz, 1H), 7.12-7.09 (dd,  $J$  = 8.0 Hz, 4.5 Hz, 1H), 6.54-6.52 (dd,  $J$  = 3.5 Hz, 1.0 Hz, 1H).  $^{13}C$  NMR (126 MHz, CDCl<sub>3</sub>):  $\delta$  148.5, 143.0, 129.0, 124.8, 120.1, 116.0, 101.0. TLC:  $R_f$  = 0.4 (MeOH/CH<sub>2</sub>Cl<sub>2</sub>, 2/23). IR (ATR): 3070 (m), 3061 (m), 2922 (s), 1584 (s), 1421 (s), 1279 (s). HRMS (DART): calculated for

[C<sub>7</sub>H<sub>6</sub>N<sub>2</sub>H]<sup>+</sup> 119.0609, measured 119.0614. <sup>1</sup>H and <sup>13</sup>C NMR spectra available on SI page 77.

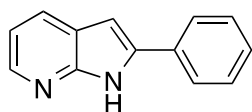

**4c**

In a reaction flask under Ar, **1l** (67 mg, 0.5 mmol), acetamide (67 mg, 1.1 mmol), and DMSO (1.0 mL) were added. The reaction was started with the addition of KO<sup>t</sup>Bu (124 mg, 1.1 mmol). The reaction was stirred on an aluminum heating block at 100°C for 18 hr. The reaction was quenched by dilution with CH<sub>2</sub>Cl<sub>2</sub> and addition of NH<sub>4</sub>Cl. The layers were separated and the aqueous phase extracted with CH<sub>2</sub>Cl<sub>2</sub> (3 X 20 mL). The combined organic layers were washed with H<sub>2</sub>O (80 mL) and dried over Na<sub>2</sub>SO<sub>4</sub>. The solvent was removed under reduced pressure to give a brown oil. Purification by silica gel flash column chromatography (CH<sub>2</sub>Cl<sub>2</sub> → MeOH/CH<sub>2</sub>Cl<sub>2</sub>, 1/39, step gradient) gave 67 mg (0.35 mmol, 69 % yield) of product as a pale yellow solid. <sup>1</sup>H NMR (500 MHz, CDCl<sub>3</sub>): δ 12.55 (s, 1H), 8.34-8.31 (d, *J* = 4.0 Hz, 1H), 8.00-7.97 (dd, *J* = 7.5 Hz, 1.5 Hz, 1H), 7.94-7.90 (m, 2H), 7.57-7.52 (m, 2H), 7.45-7.40 (tt, *J* = 7.5 Hz, 1.0 Hz, 1H), 7.15-7.10 (dd, *J* = 8.0 Hz, 4.5 Hz, 1H), 6.82 (s, 1H). <sup>13</sup>C NMR (126 MHz, CDCl<sub>3</sub>): δ 150.0, 142.0, 139.5, 132.4, 129.0, 128.7, 128.2, 125.9, 122.4, 116.1, 97.4. TLC: *R*<sub>f</sub> = 0.8 (MeOH/CH<sub>2</sub>Cl<sub>2</sub>, 1/19), 0.4 (MeOH/CH<sub>2</sub>Cl<sub>2</sub>, 1/39). IR (ATR): 3160 (s), 3032 (s), 2972 (m), 2787 (m), 1904 (w), 1870 (w), 1833 (w), 1716 (w), 1698 (w), 1675 (w), 1588 (m), 1541 (m), 1486 (m), 1456 (m), 1431 (m), 1410 (m), 1363 (m), 1330 (m), 1280 (s), 1223 (w), 1195 (m), 1111 (m), 1074 (w), 1045 (w), 1029 (w). HRMS (DART): calculated for [C<sub>13</sub>H<sub>10</sub>N<sub>2</sub>H]<sup>+</sup> 195.0917, measured 195.0895. <sup>1</sup>H and <sup>13</sup>C NMR spectra available on SI page 78.

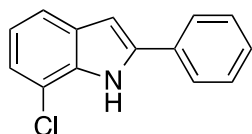

**4f**

In a reaction flask under Ar, **1o** (115 mg, 0.5 mmol), acetamide (66 mg, 1.1 mmol), and DMSO (1.0 mL) were added. The reaction was started with the addition of KO<sup>t</sup>Bu (123 mg, 1.1 mmol). The reaction was stirred on an aluminum heating block at 100°C for 18 hr. The reaction was quenched by dilution with ethyl acetate and addition of NH<sub>4</sub>Cl. The layers were separated and the aqueous phase extracted with ethyl acetate (3 X 20 mL). The combined organic layers were washed with H<sub>2</sub>O (80 mL) and dried over Na<sub>2</sub>SO<sub>4</sub>. The solvent was removed under reduced pressure to give a brown oil. Purification by silica gel flash column chromatography (hexanes → CH<sub>2</sub>Cl<sub>2</sub>/hexanes, 1/1, step gradient) gave 76 mg (0.34 mmol, 67 % yield) of product as a yellow solid. <sup>1</sup>H NMR (500 MHz, CDCl<sub>3</sub>): δ 8.53 (s, 1H), 7.74-7.71 (m, 2H), 7.58-7.55 (dt, *J* = 8.0 Hz, 0.5 Hz, 1H), 7.52-7.47 (m, 2H), 7.41-7.37 (m, 1H), 7.24-7.21 (dd, *J* = 8.0 Hz, 1.0 Hz, 1H), 7.12-7.07 (t, *J* =

7.5 Hz, 1H), 6.89-6.88 (d,  $J$  = 2.5 Hz, 1H).  $^{13}\text{C}$  NMR (126 MHz,  $\text{CDCl}_3$ ):  $\delta$  138.7, 134.0, 131.8, 130.6, 129.1, 128.2, 125.3, 121.6, 121.0, 119.2, 116.3, 100.8. TLC:  $R_f$  = 0.1 (hexanes), 0.7 ( $\text{CH}_2\text{Cl}_2$ /hexanes, 1/1). IR (ATR): 3854 (w), 3748 (w), 3673 (w), 3650 (w), 3438 (s), 3067 (w), 3038 (w), 1957 (w), 1879 (w), 1834 (w), 1771 (w), 1685 (w), 1617 (w), 1602 (m), 1568 (m), 1542 (w), 1485 (s), 1451 (s), 1431 (s), 1391 (s), 1352 (s), 1324 (s), 1299 (s), 1244 (s), 1195 (s), 1163 (w), 1141 (m), 1097 (w), 1073 (w), 1050 (w), 1028 (w). HRMS (DART): calculated for  $[\text{C}_{14}\text{H}_{10}\text{ClNH}]^+$  228.0580, measured 228.0589.  $^1\text{H}$  and  $^{13}\text{C}$  NMR spectra available on SI page 79.

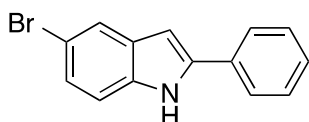

#### 4g

In a reaction flask under Ar, **1p** (137 mg, 0.5 mmol), acetamide (66 mg, 1.1 mmol), and DMSO (1.0 mL) were added. The reaction was started with the addition of  $\text{KO}^t\text{Bu}$  (123 mg, 1.1 mmol). The reaction was stirred on an aluminum heating block at  $100^\circ\text{C}$  for 18 hr. The reaction was quenched by dilution with ethyl acetate and addition of  $\text{NH}_4\text{Cl}$ . The layers were separated and the aqueous phase extracted with ethyl acetate (3 X 20 mL). The combined organic layers were washed with  $\text{H}_2\text{O}$  (80 mL) and dried over  $\text{Na}_2\text{SO}_4$ . The solvent was removed under reduced pressure to give a brown oil. Purification by silica gel flash column chromatography (hexanes  $\rightarrow$   $\text{CH}_2\text{Cl}_2$ /hexanes, 1/1, step gradient) gave 84 mg (0.31 mmol, 62 % yield) of product as a yellow solid.  $^1\text{H}$  NMR (500 MHz,  $\text{CDCl}_3$ ):  $\delta$  8.39 (s, 1H), 7.78-7.76 (q,  $J$  = 1.0 Hz), 7.69-7.65 (m, 2H), 7.50-7.45 (tt,  $J$  = 7.0 Hz, 2.0 Hz, 2H), 7.40-7.35 (tt,  $J$  = 7.0 Hz, 1.0 Hz, 1H), 7.30-7.28 (d,  $J$  = 1.0 Hz, 2H), 6.79-6.77 (d,  $J$  = 2.5 Hz, 1H).  $^{13}\text{C}$  NMR (126 MHz,  $\text{CDCl}_3$ ):  $\delta$  139.1, 135.4, 131.8, 131.0, 129.1, 128.2, 125.3, 125.1, 123.1, 113.4, 112.3, 99.5. TLC:  $R_f$  = 0.7 ( $\text{CH}_2\text{Cl}_2$ /hexanes, 1/1). IR (ATR): 3436 (s), 3082 (w), 3060 (w), 3037 (w), 2923 (w), 2853 (w), 1570 (w), 1488 (m), 1453 (s), 1393 (m), 1310 (m), 1282 (m), 1180 (w), 1128 (w), 1053 (m). HRMS (DART): calculated for  $[\text{C}_{14}\text{H}_{10}\text{BrNH}]^+$  272.0075, measured 272.0083.  $^1\text{H}$  and  $^{13}\text{C}$  NMR spectra available on SI page 80.

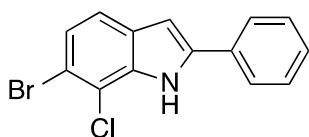

#### 4h

In a reaction flask under Ar, **1q** (154 mg, 0.5 mmol), acetamide (66 mg, 1.1 mmol), and DMSO (1.0 mL) were added. The reaction was started with the addition of  $\text{KO}^t\text{Bu}$  (123 mg, 1.1 mmol). The reaction was stirred on an aluminum heating block at  $100^\circ\text{C}$  for 18 hr. The reaction was quenched by dilution with ethyl acetate and addition of  $\text{NH}_4\text{Cl}$ . The layers were separated and the aqueous phase extracted with ethyl acetate (3 X 20 mL). The combined organic layers were washed with  $\text{H}_2\text{O}$  (80 mL) and dried over  $\text{Na}_2\text{SO}_4$ . The solvent was removed under reduced pressure to give a brown oil. Purification by silica gel flash column chromatography (hexanes  $\rightarrow$   $\text{CH}_2\text{Cl}_2$ /hexanes, 1/1, step gradient)



gave 90 mg (0.30 mmol, 59 % yield) of product as a yellow solid.  $^1\text{H}$  NMR (500 MHz,  $\text{CDCl}_3$ ):  $\delta$  8.51 (s, 1H), 7.71-7.67 (m, 2H), 7.51-7.46 (m, 2H), 7.42-7.37 (m, 2H), 7.36-7.33 (d,  $J$  = 8.5 Hz, 1H), 6.84-6.82 (d,  $J$  = 2.0 Hz, 1H).  $^{13}\text{C}$  NMR (126 MHz,  $\text{CDCl}_3$ ):  $\delta$  139.3, 134.9, 131.4, 129.3, 129.2, 128.4, 125.3, 125.0, 120.0, 116.6, 115.0, 100.9. TLC:  $R_f$  = 0.1 (hexanes), 0.7 ( $\text{CH}_2\text{Cl}_2$ /hexanes, 1/1). IR (ATR): 3426 (s), 3080 (m), 3057 (m), 3036 (m), 2924 (m), 2854 (m), 1939 (w), 1866 (w), 1735 (w), 1604 (m), 1567 (m), 1488 (s), 1473 (s), 1450 (s), 1432 (s), 1375 (s), 1338 (s), 1309 (m), 1296 (m), 1273 (w), 1227 (s), 1182 (w), 1153 (s), 1119 (w), 1097 (w), 1050 (w), 1029 (w), 1000 (w). HRMS (DART): calculated for  $[\text{C}_{14}\text{H}_9\text{BrClNH}]^+$  305.9685, measured 305.9697.  $^1\text{H}$  and  $^{13}\text{C}$  NMR spectra available on SI page 81.

## Hydroxide/p-tolylamide competition reaction

In a reaction flask under Ar, **1a** (212 mg, 1.1 mmol), p-toluidine (236 mg, 2.2 mmol), water (39.6  $\mu\text{L}$ , 2.2 mmol) and DMSO (2.0 mL) were added. The reaction was started with the addition of KO $t$ Bu (494 mg, 4.4 mmol). The reaction was stirred on an aluminum heating block at 100°C for 18 hr. The reaction was quenched by dilution with  $\text{CH}_2\text{Cl}_2$  and addition of  $\text{NH}_4\text{Cl}$ . The layers were separated and the aqueous phase extracted with  $\text{CH}_2\text{Cl}_2$  (3 X 20 mL). The combined organic layers were washed with  $\text{H}_2\text{O}$  (80 mL) and dried over  $\text{Na}_2\text{SO}_4$ . The solvent was removed under reduced pressure to give a brown oil. Purification by silica gel flash column chromatography (hexanes  $\rightarrow$   $\text{CH}_2\text{Cl}_2$ , step gradient) gave 191.4 mg (0.99 mmol) **3a** and 14.7 mg (0.05 mmol) **2a**.

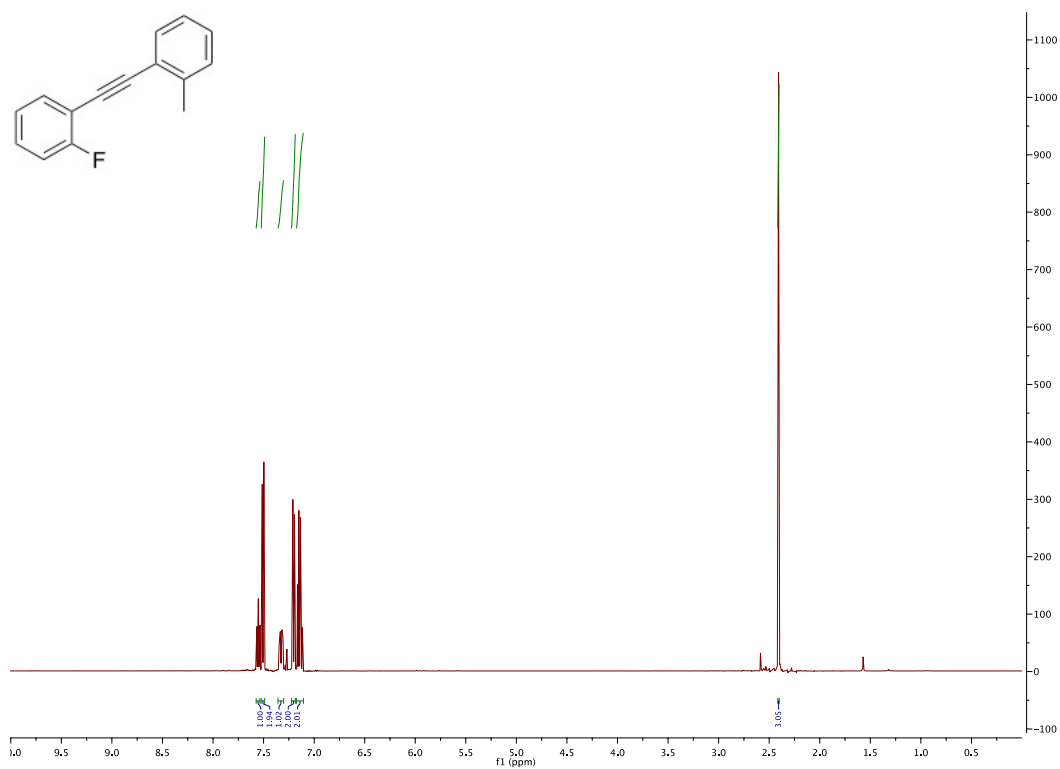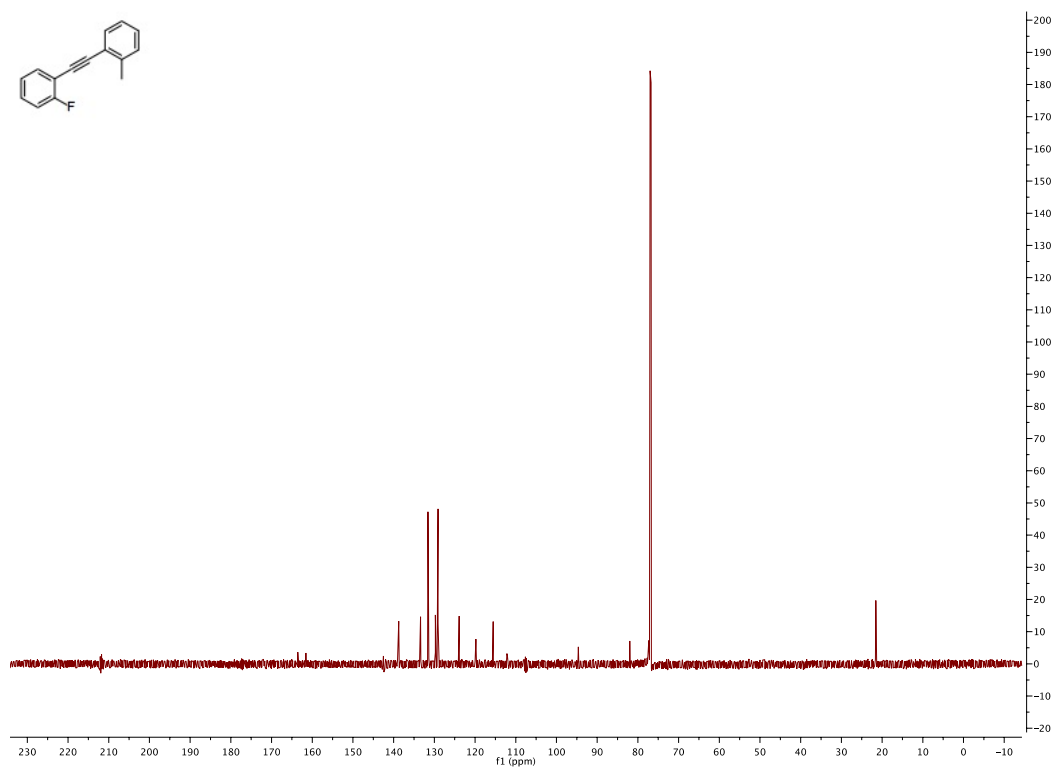



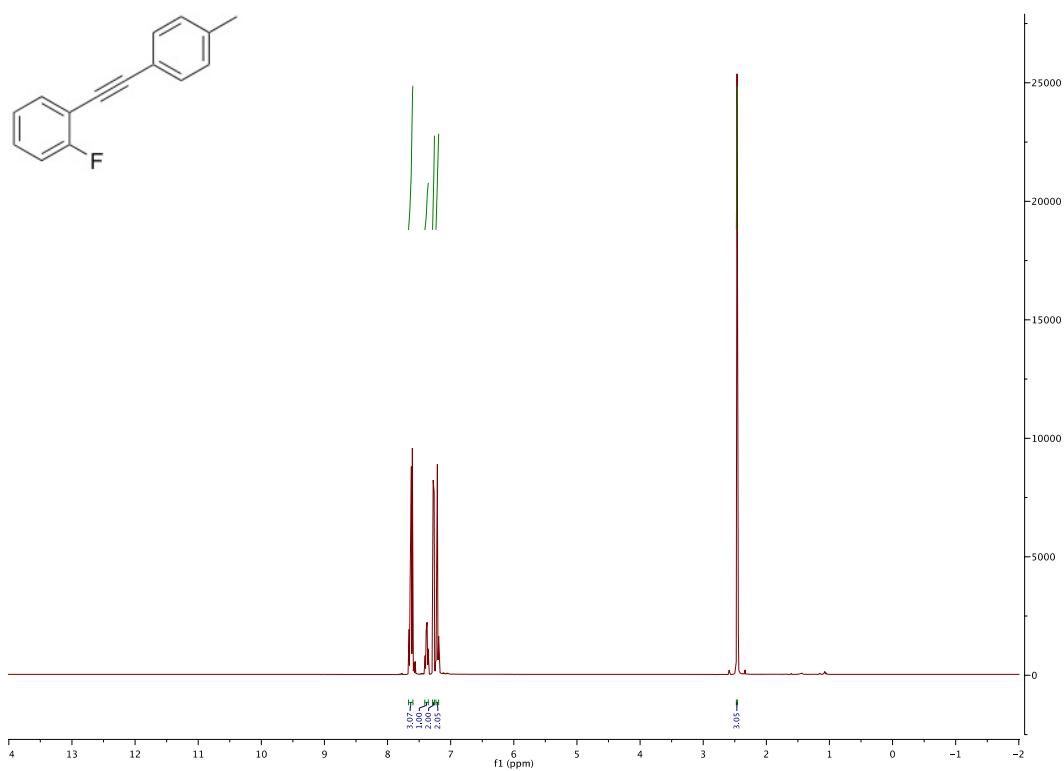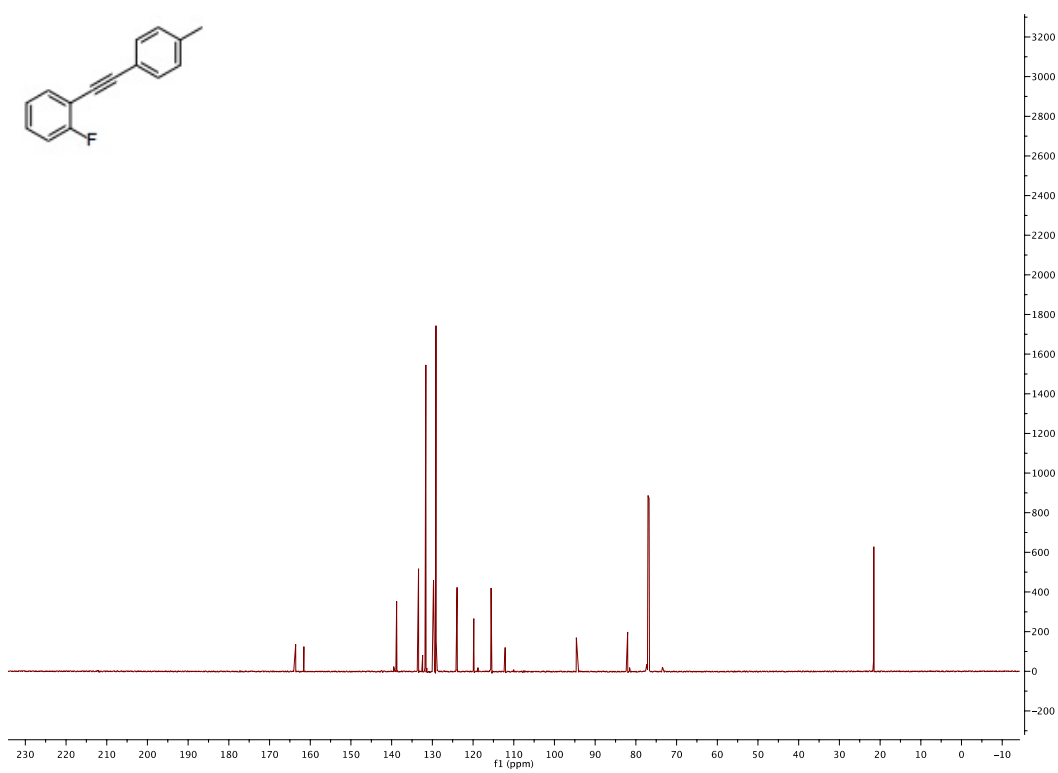

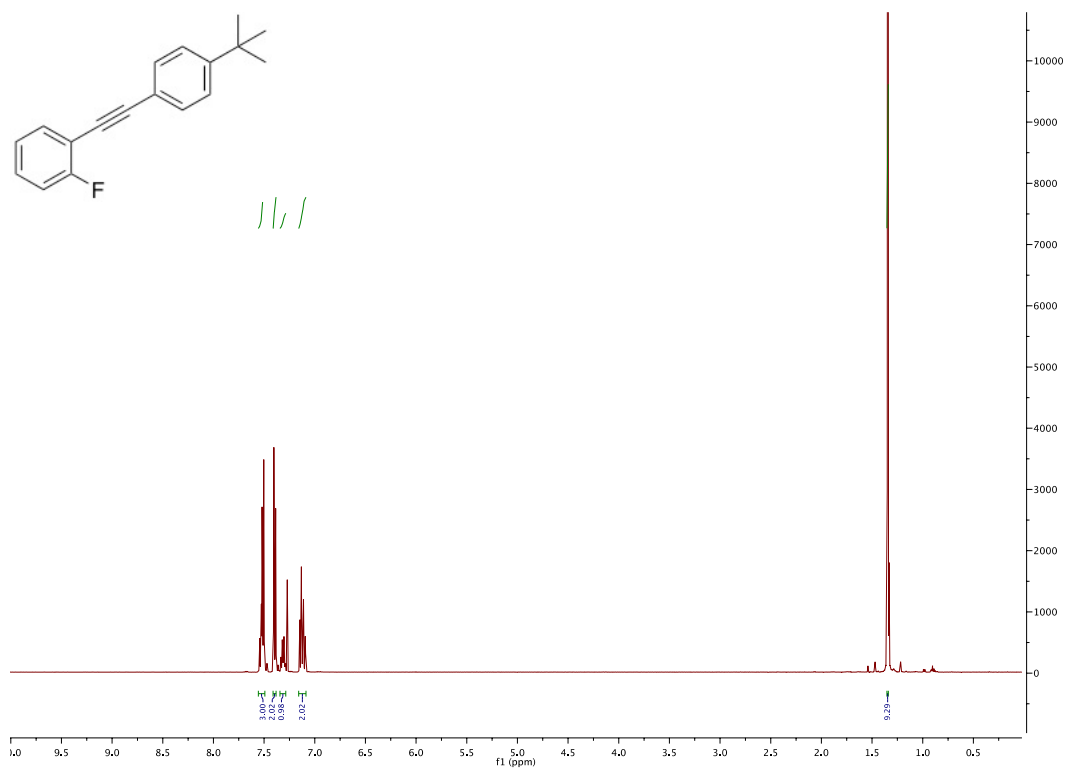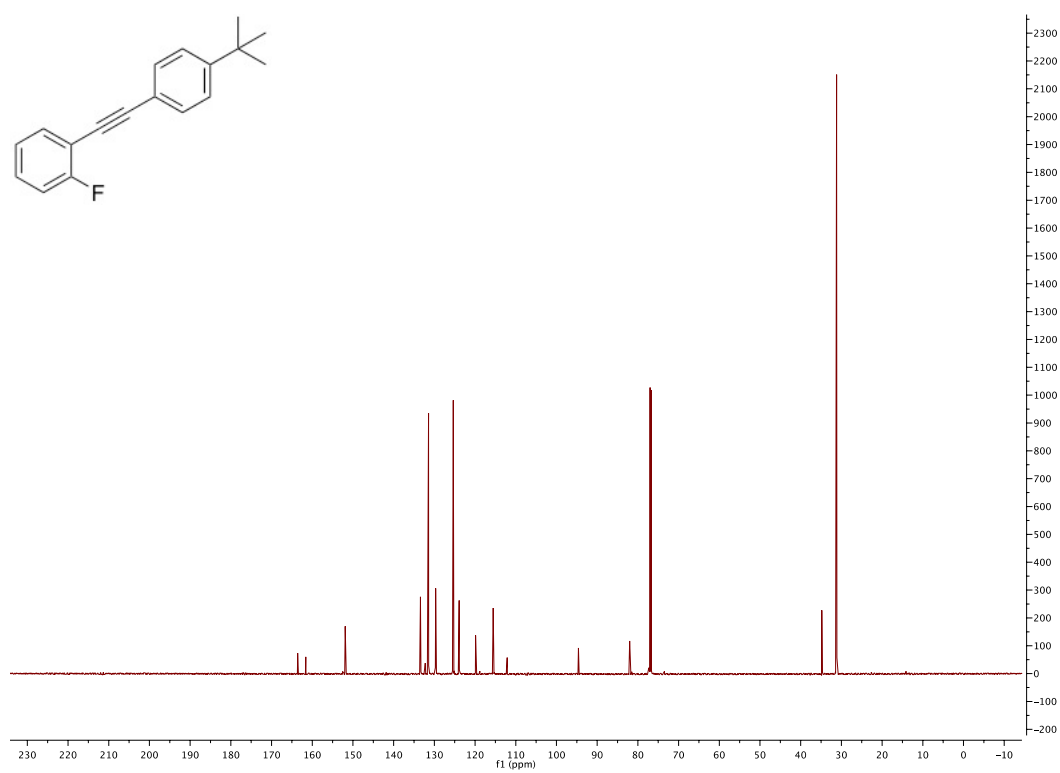



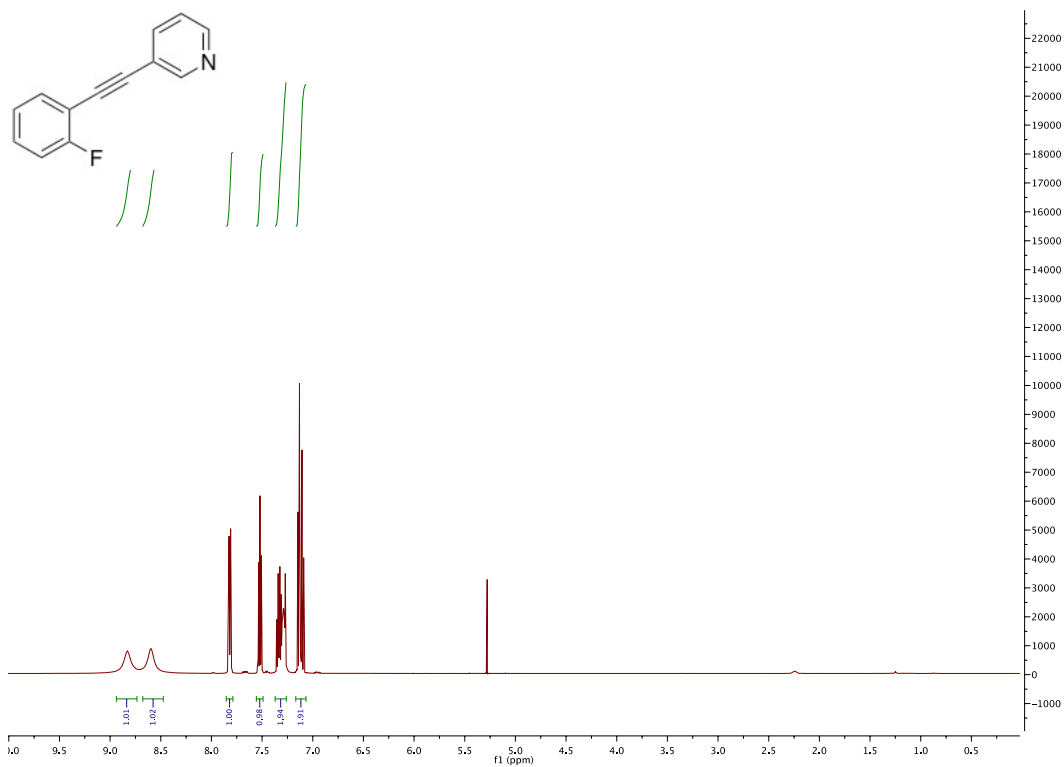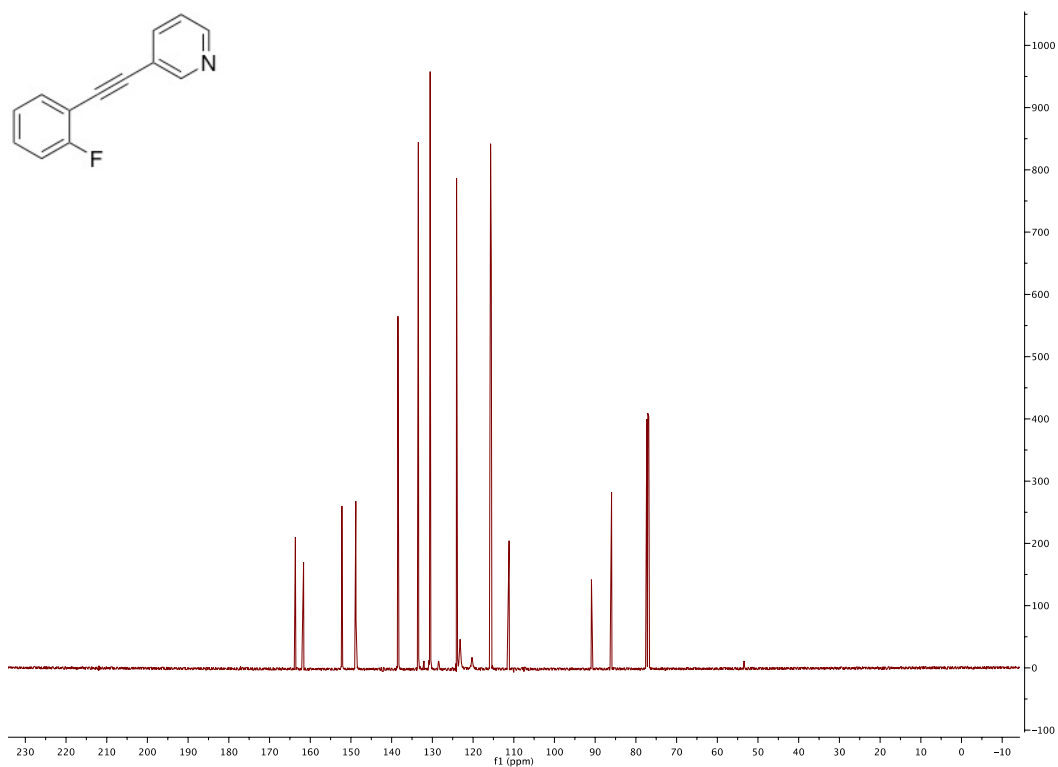

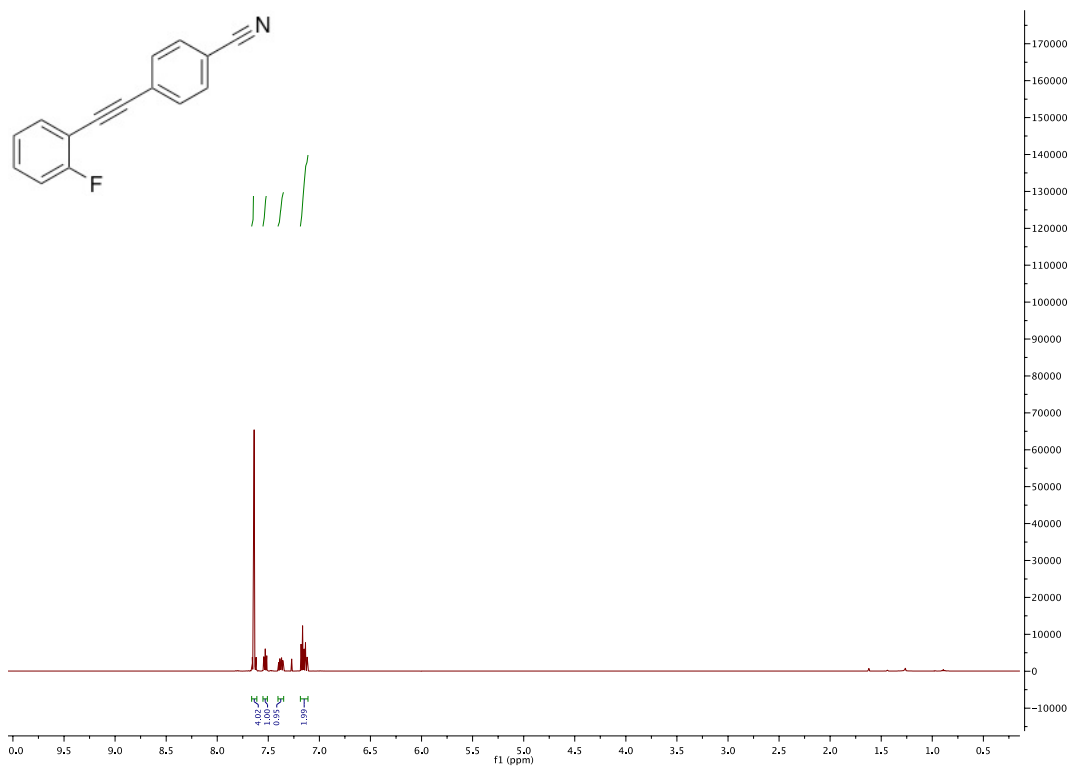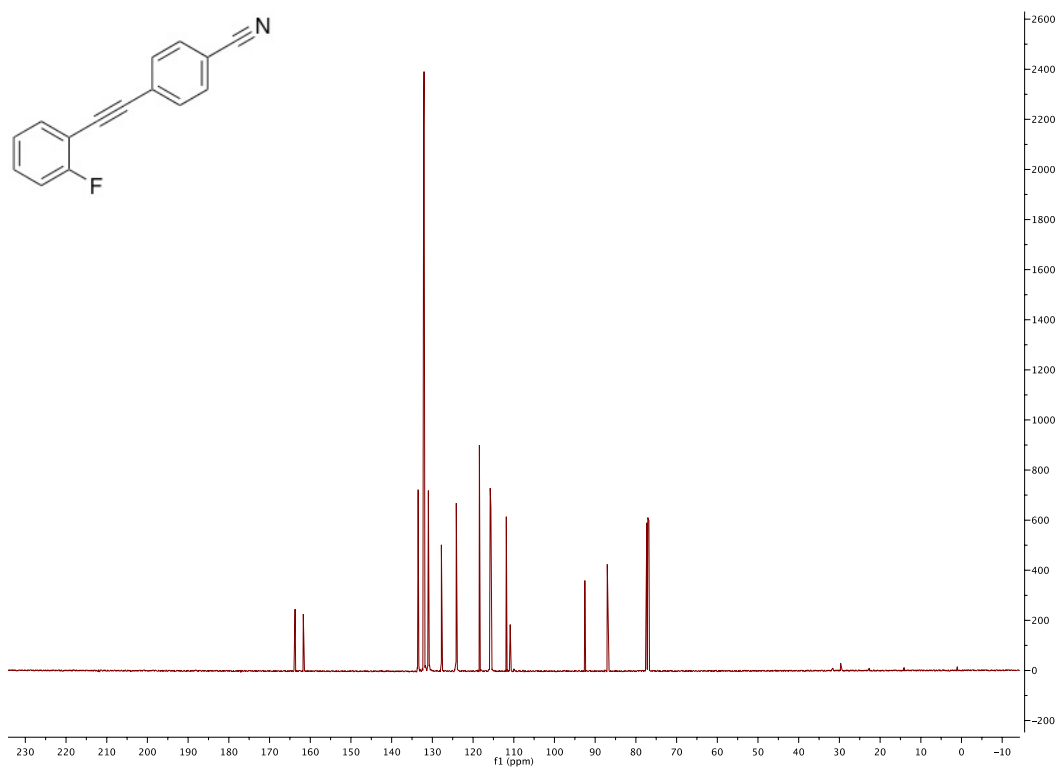



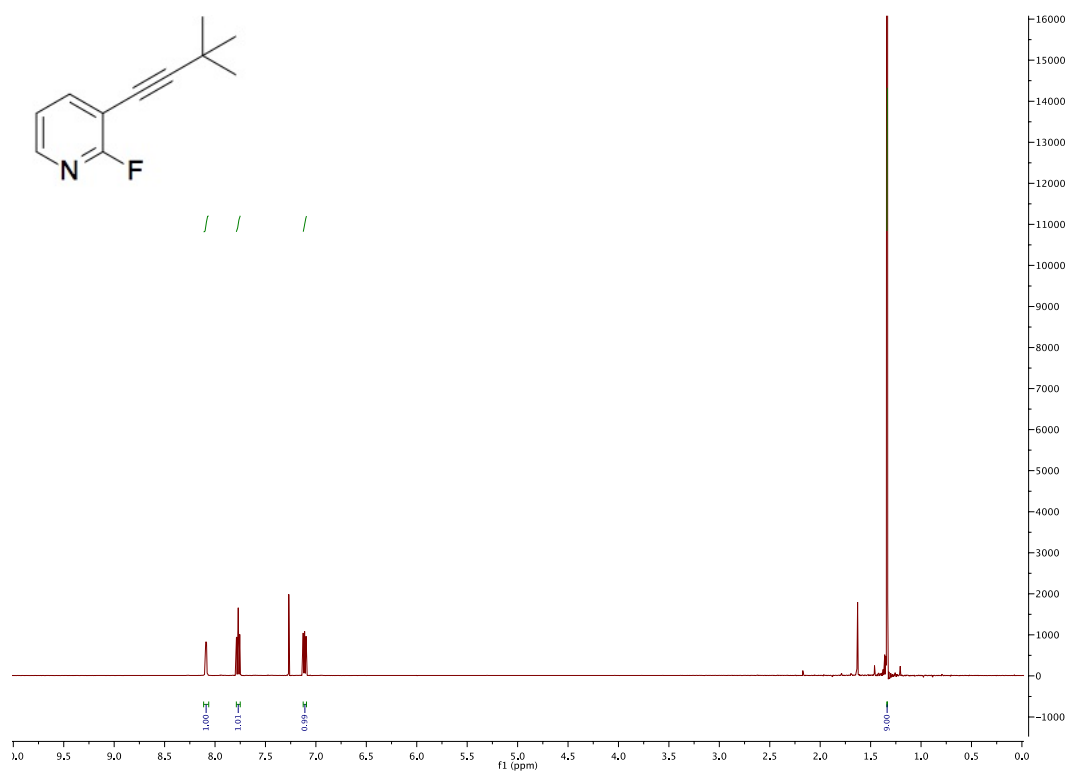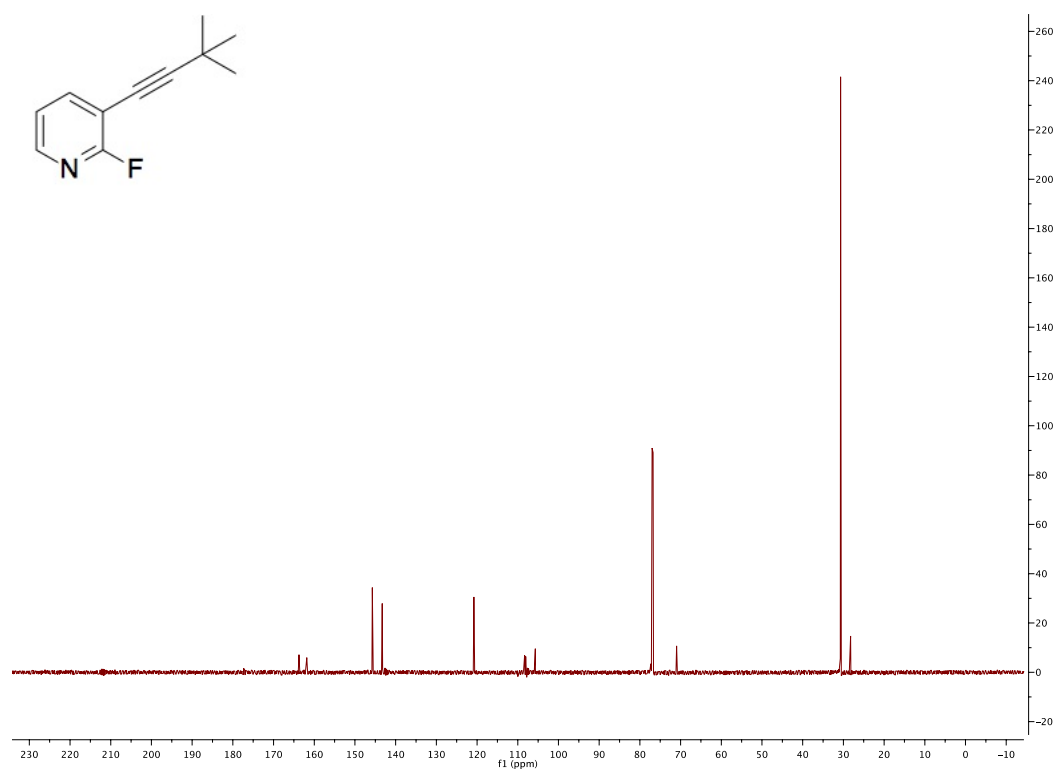

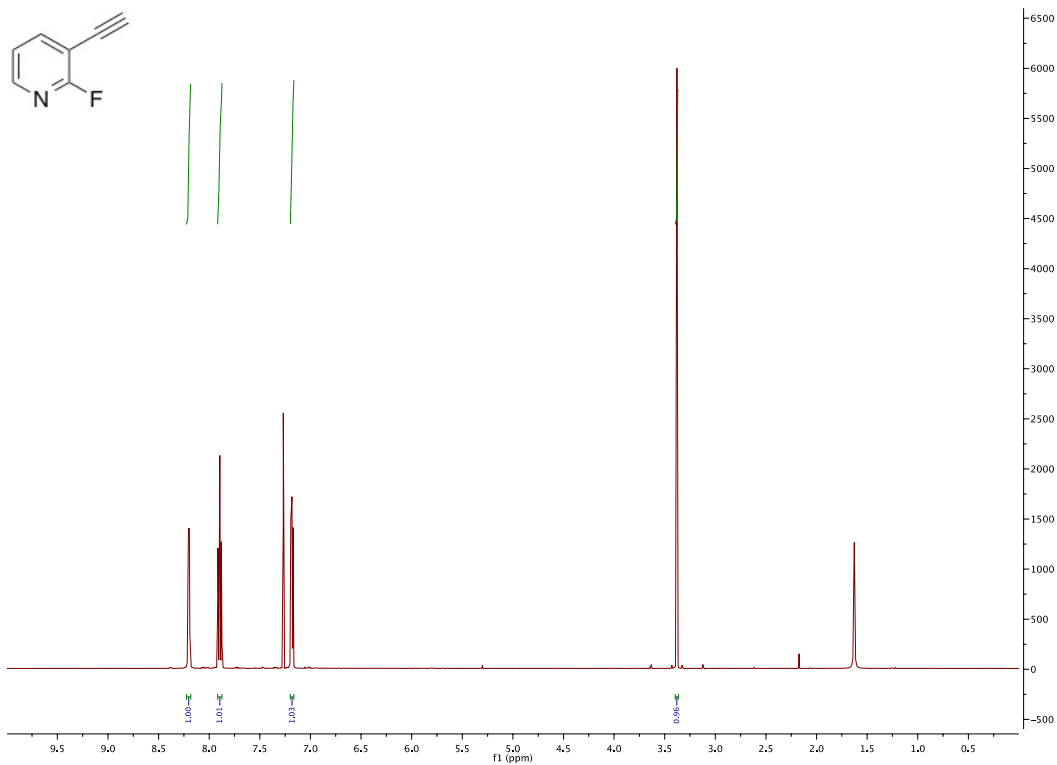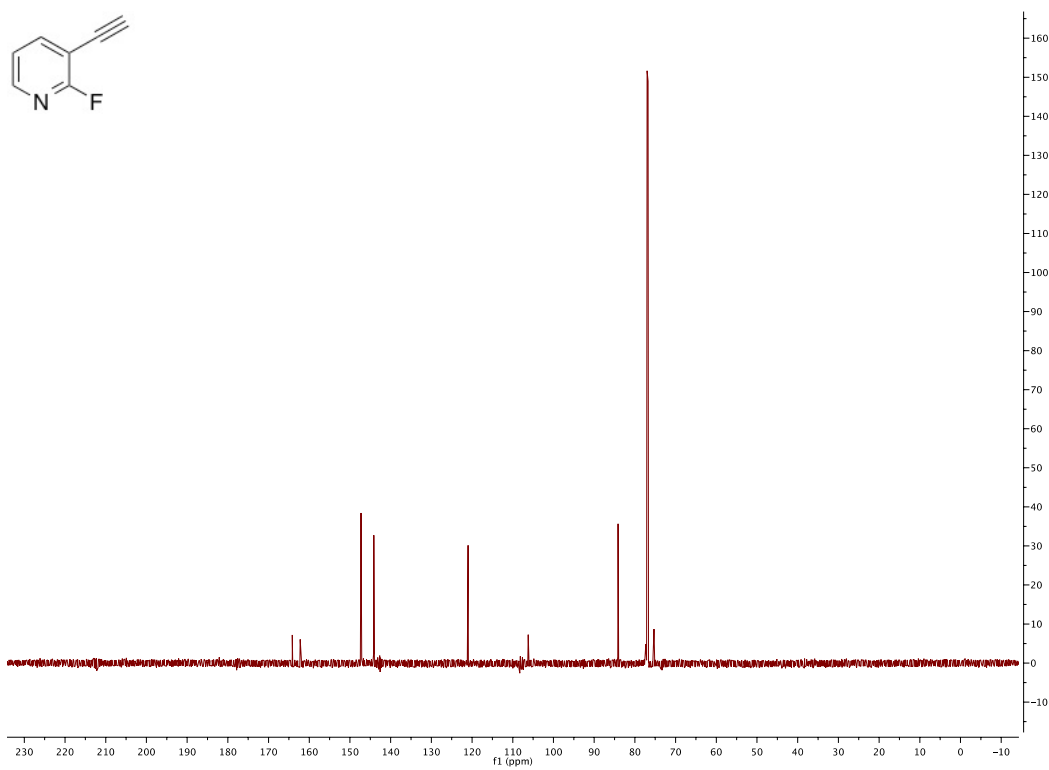

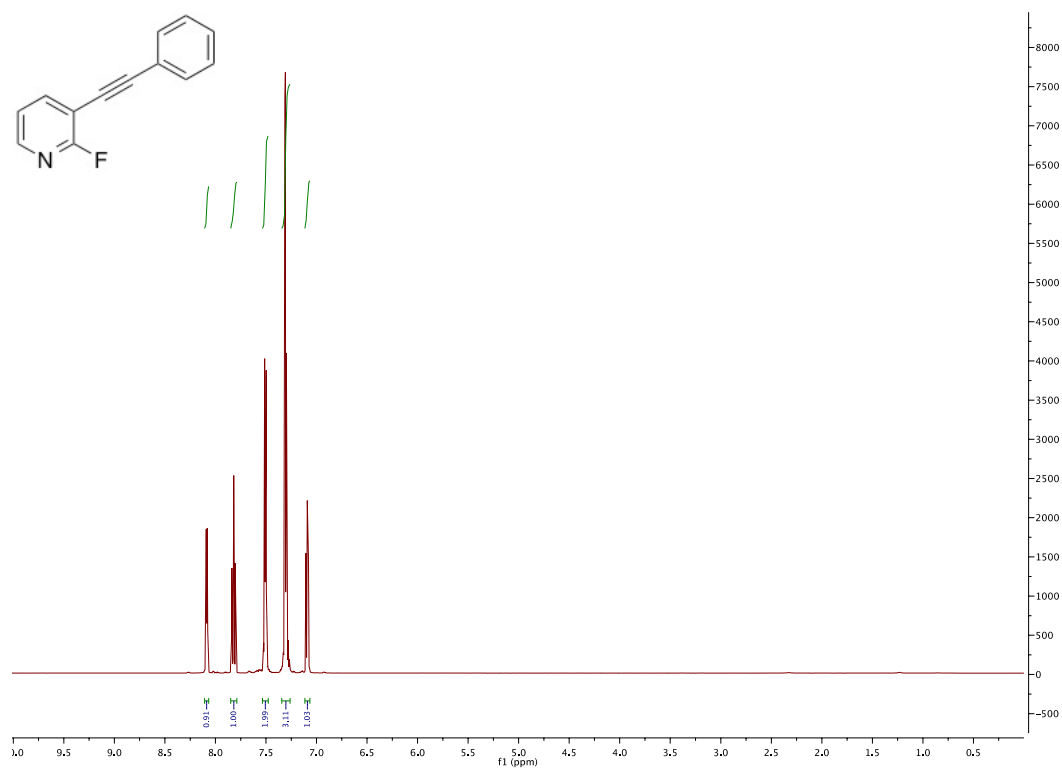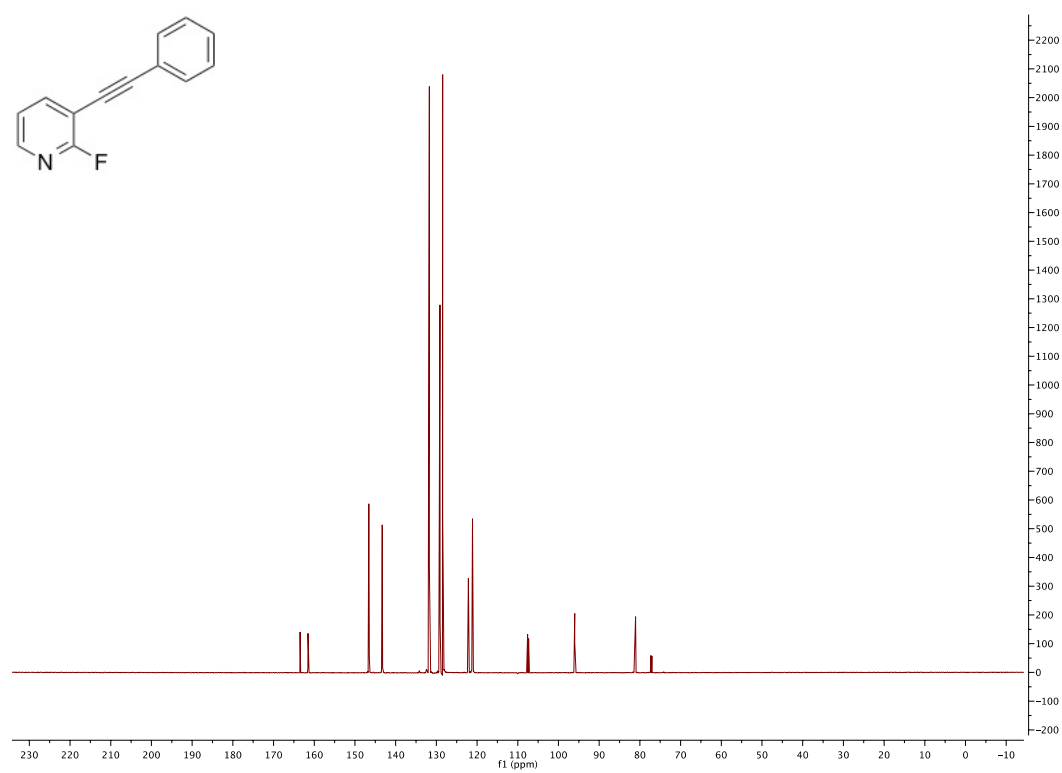

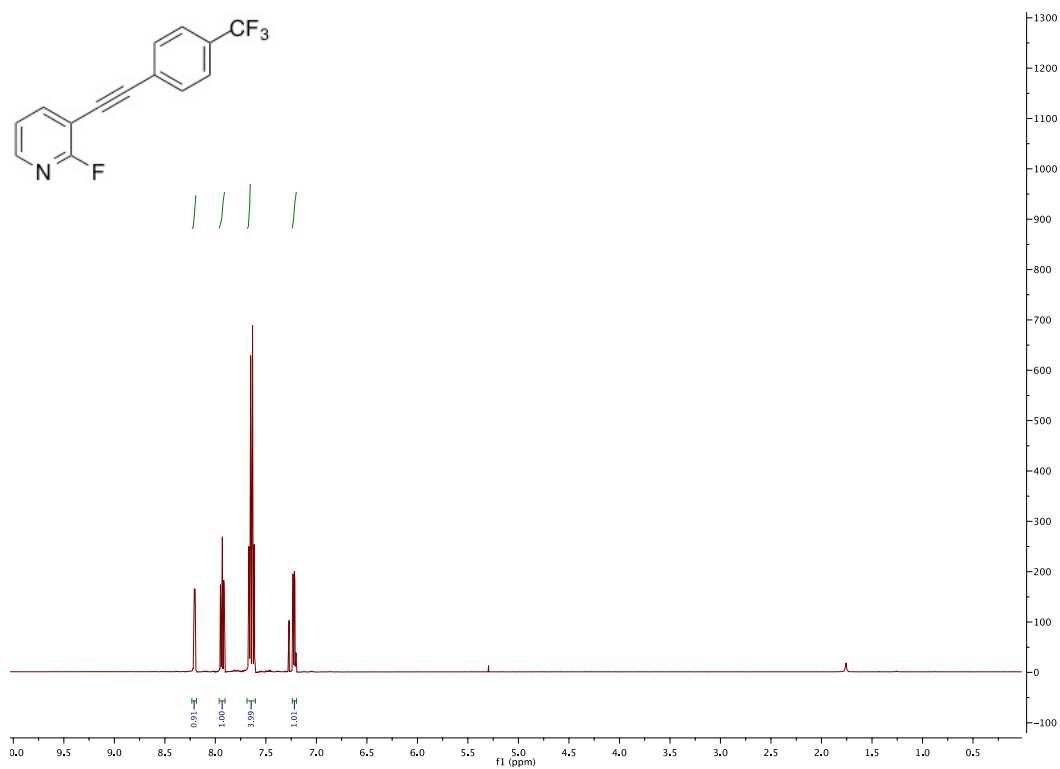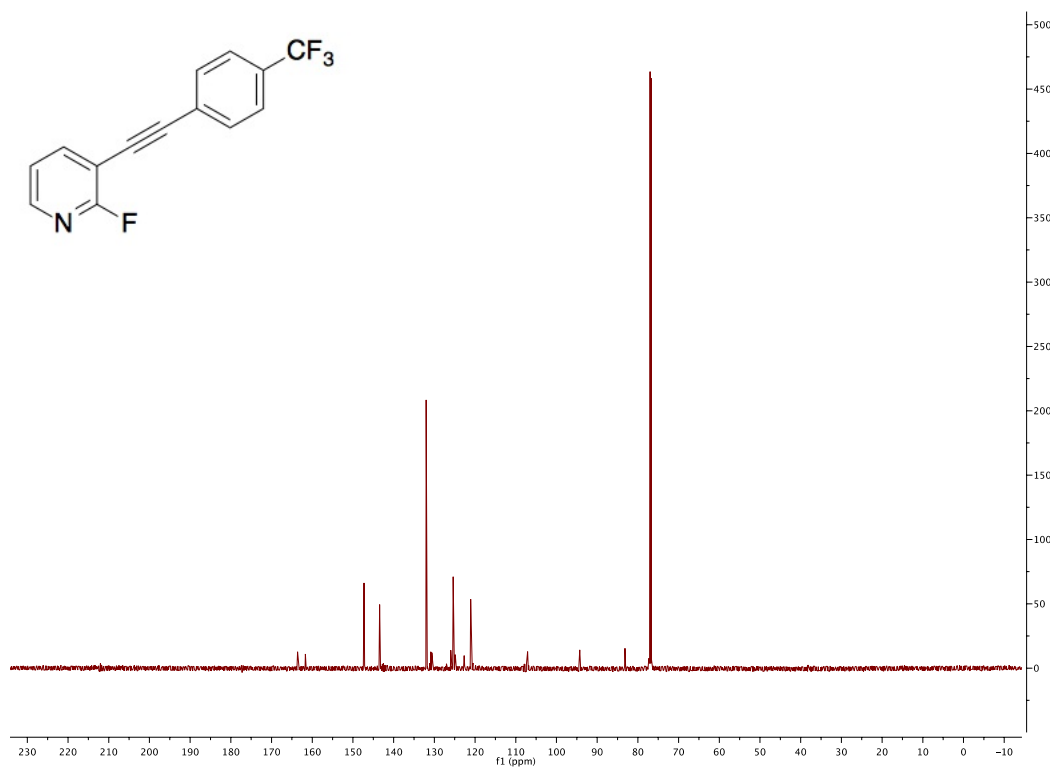

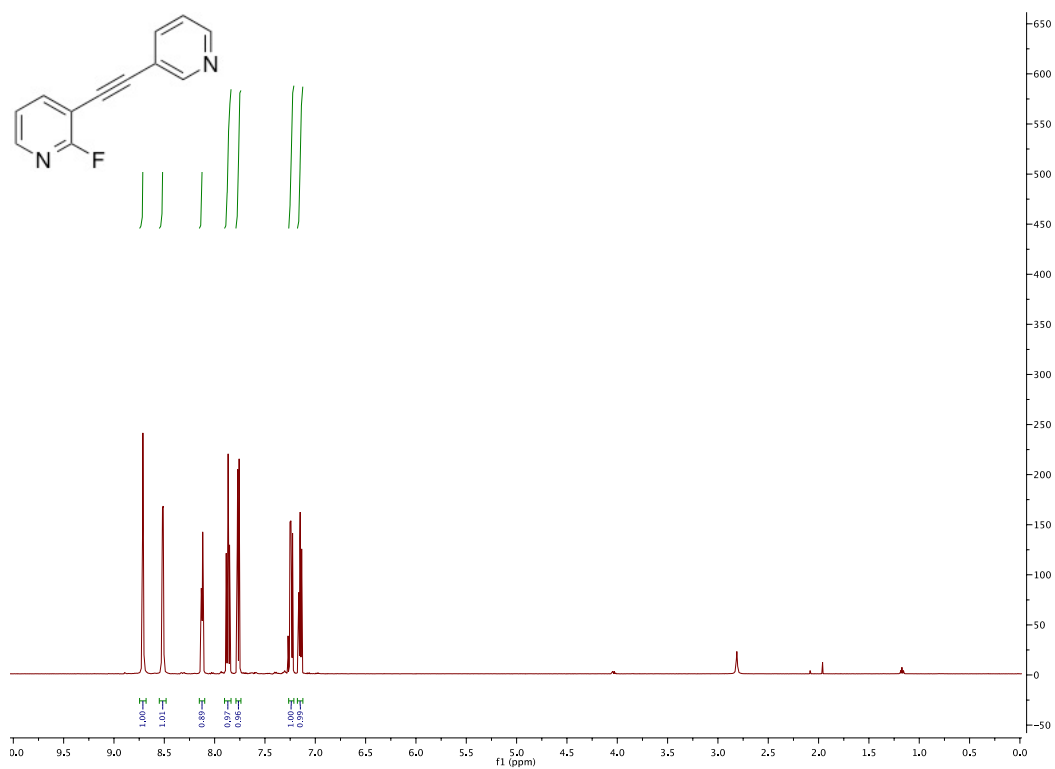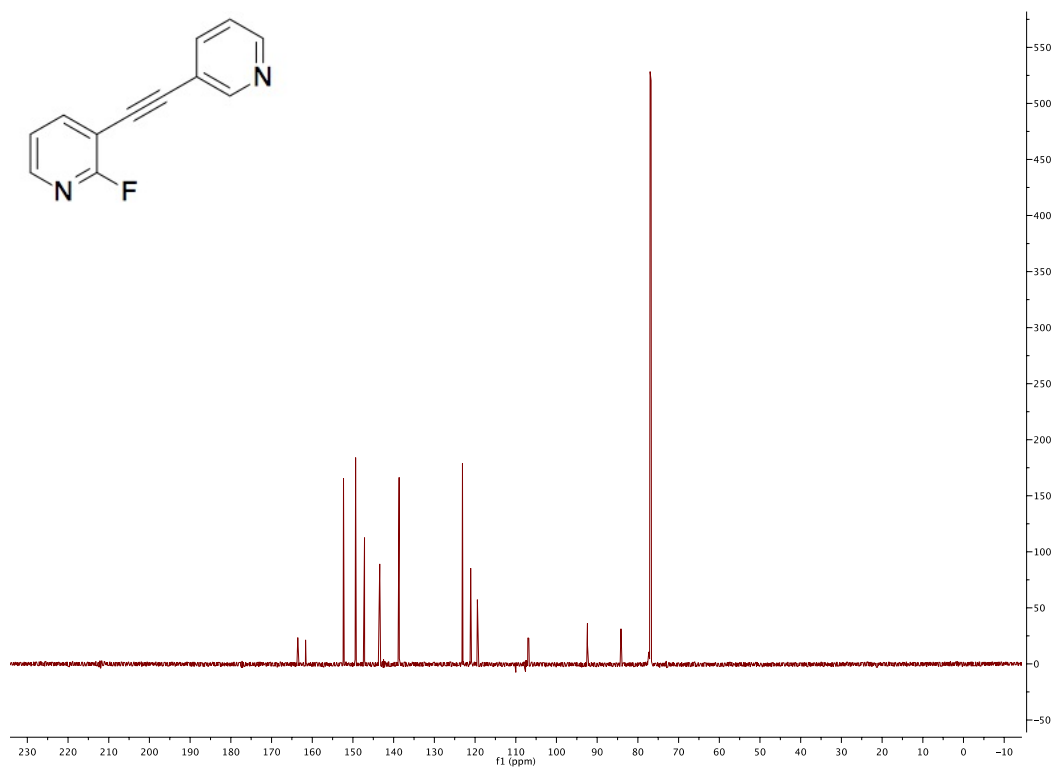

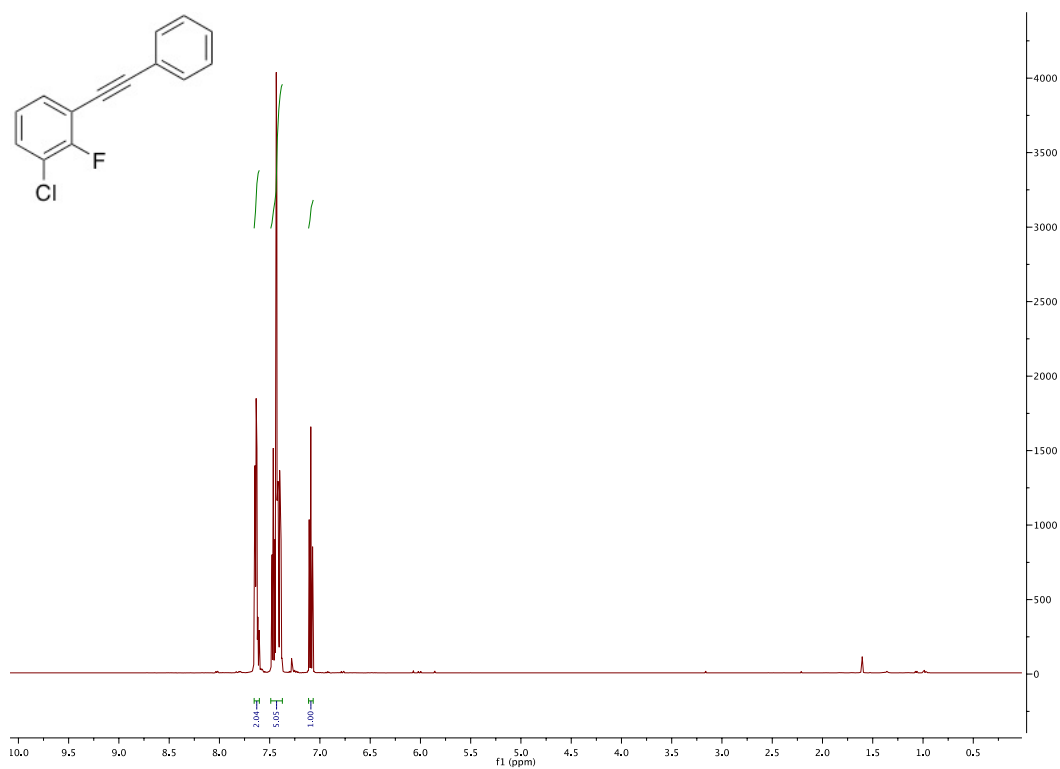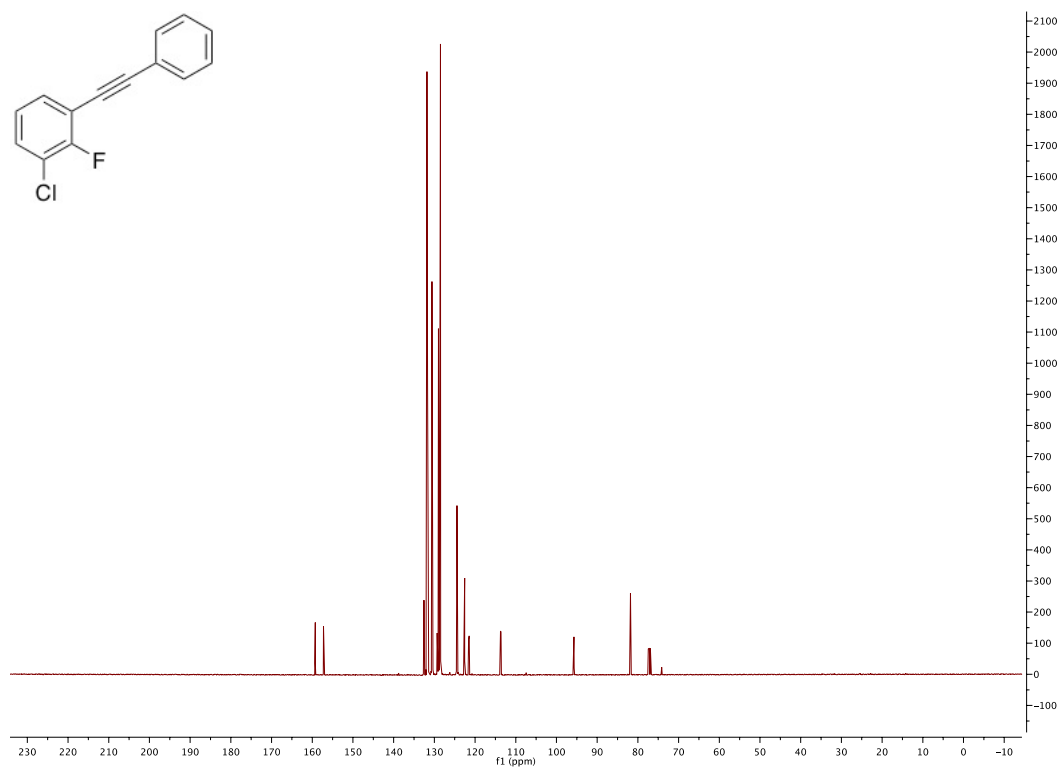

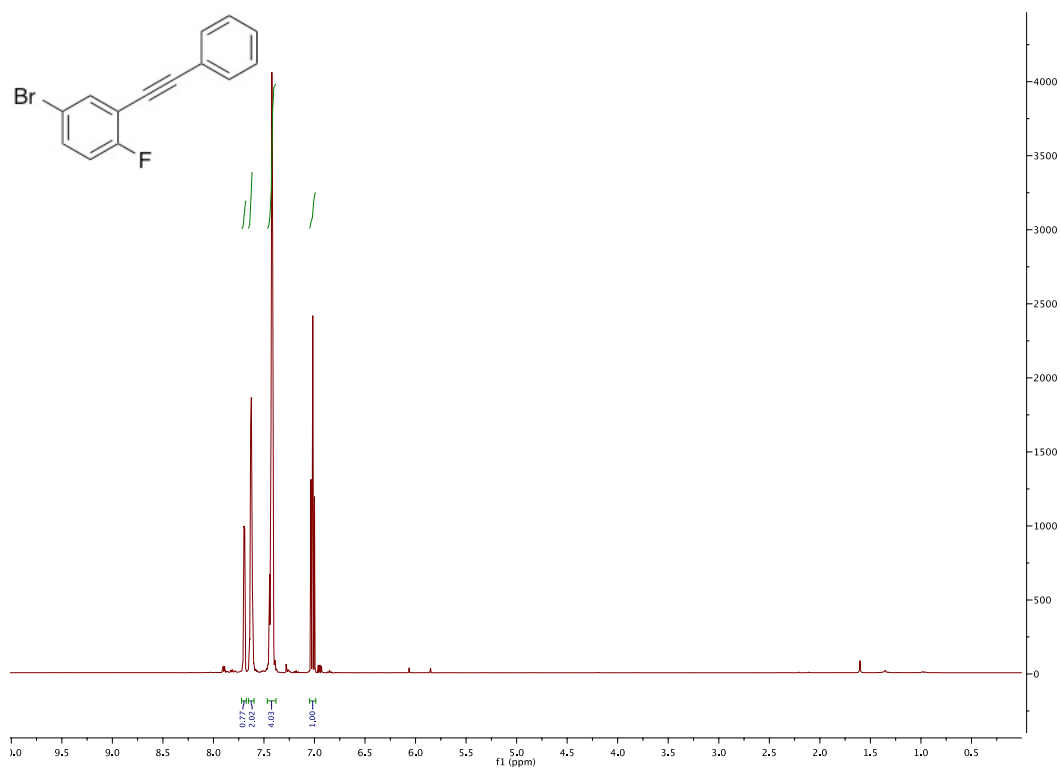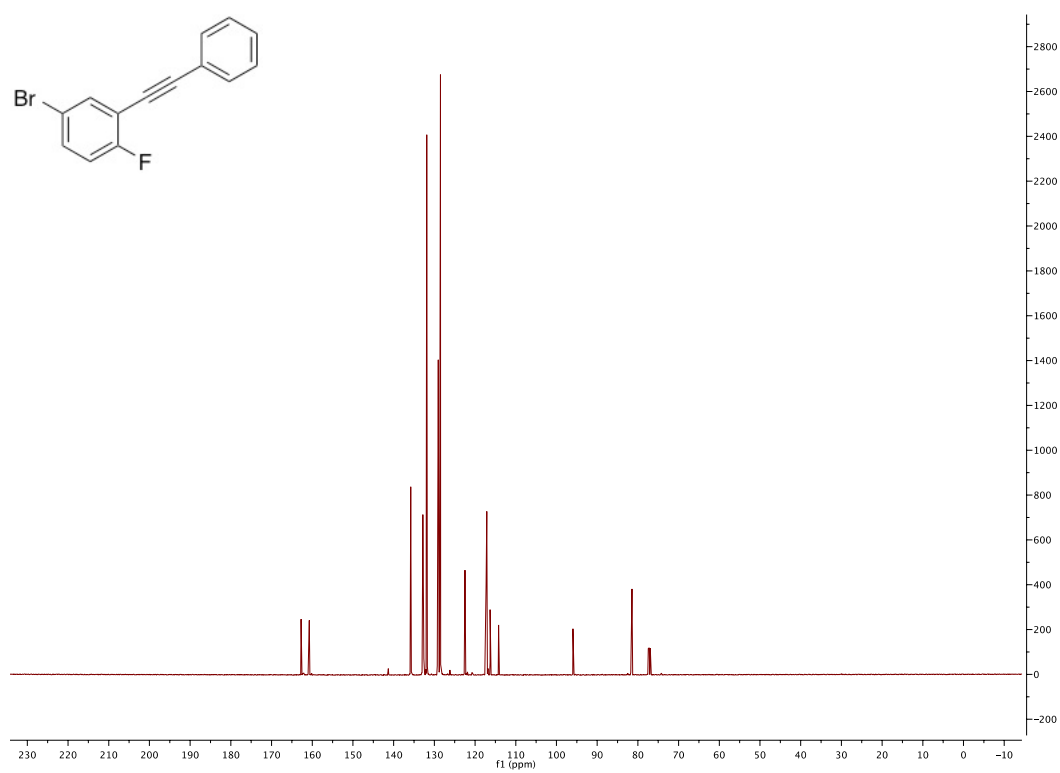

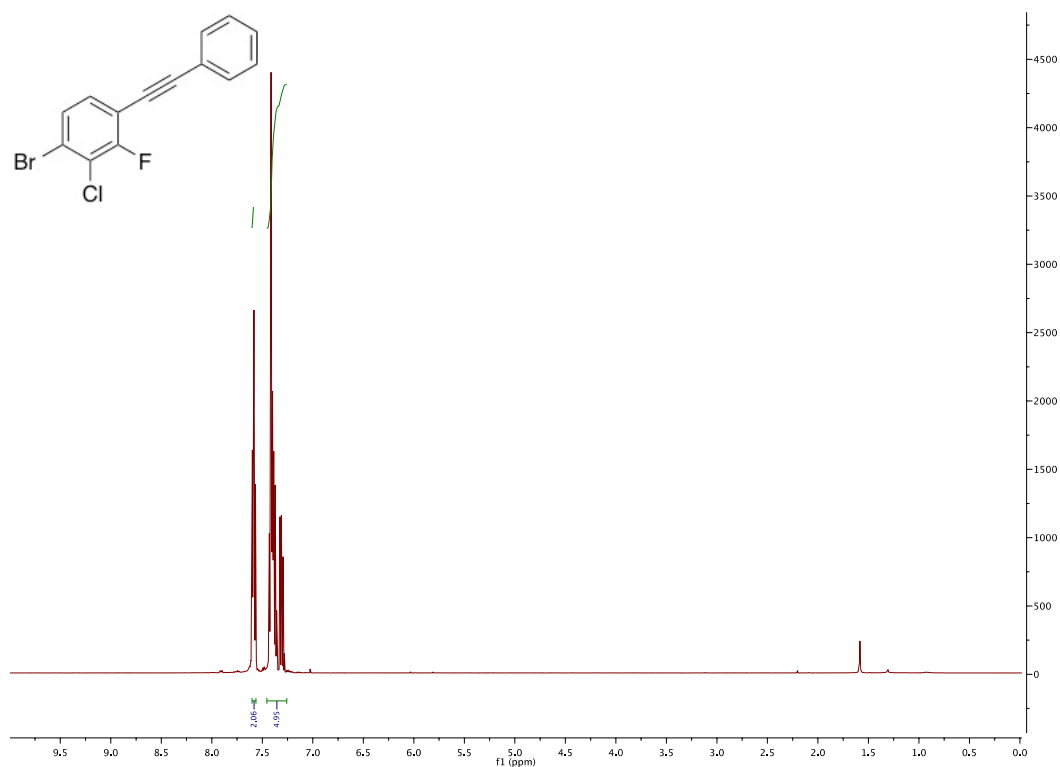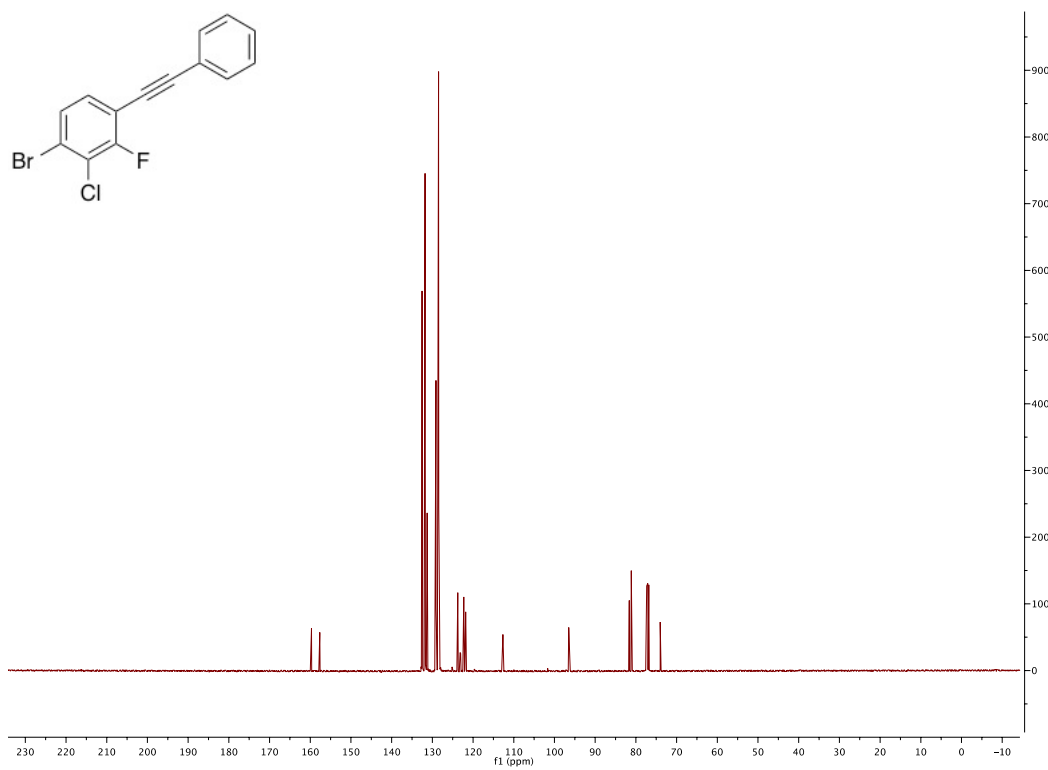



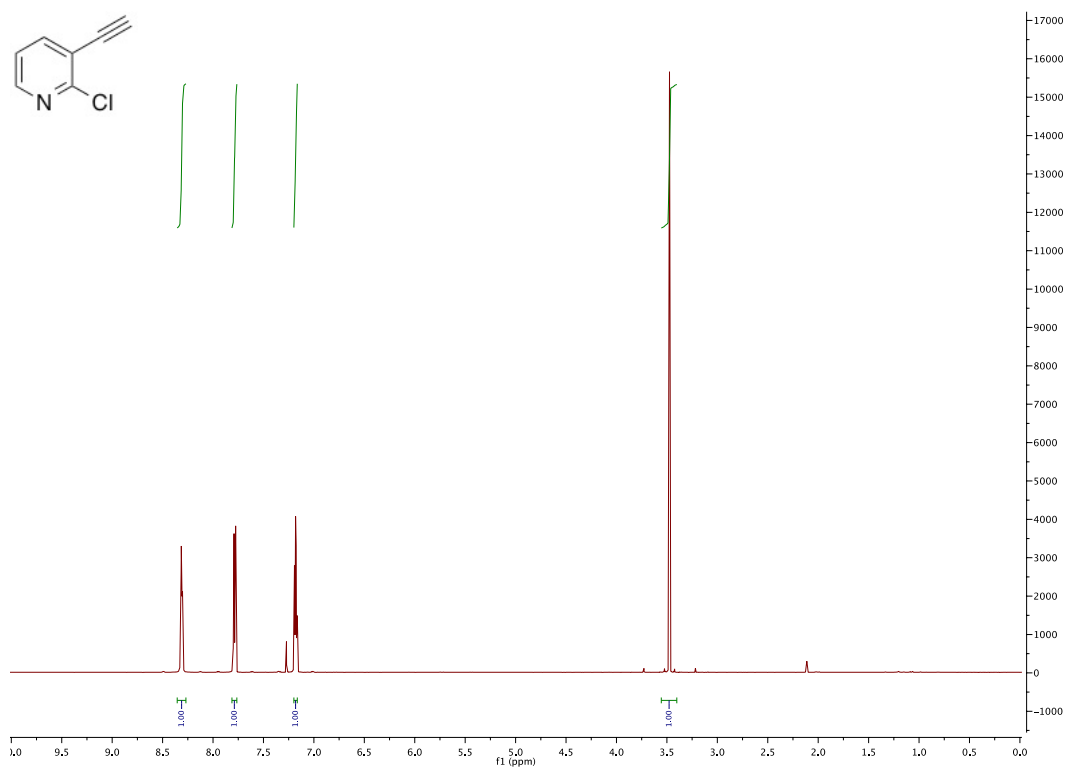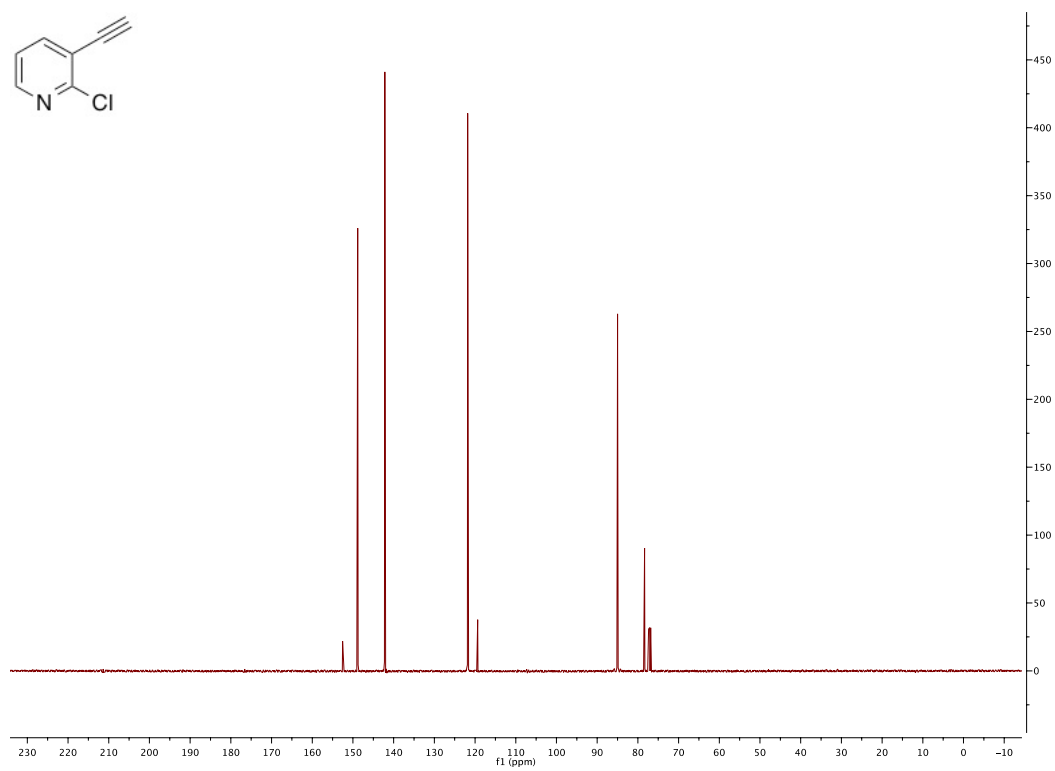

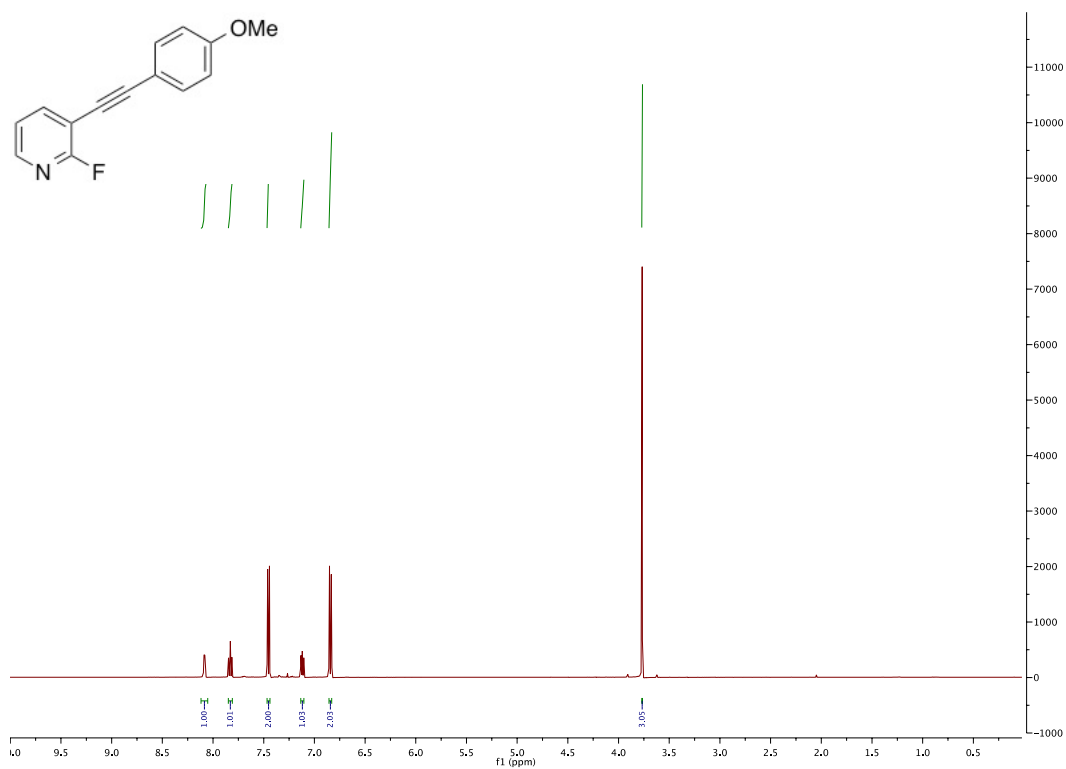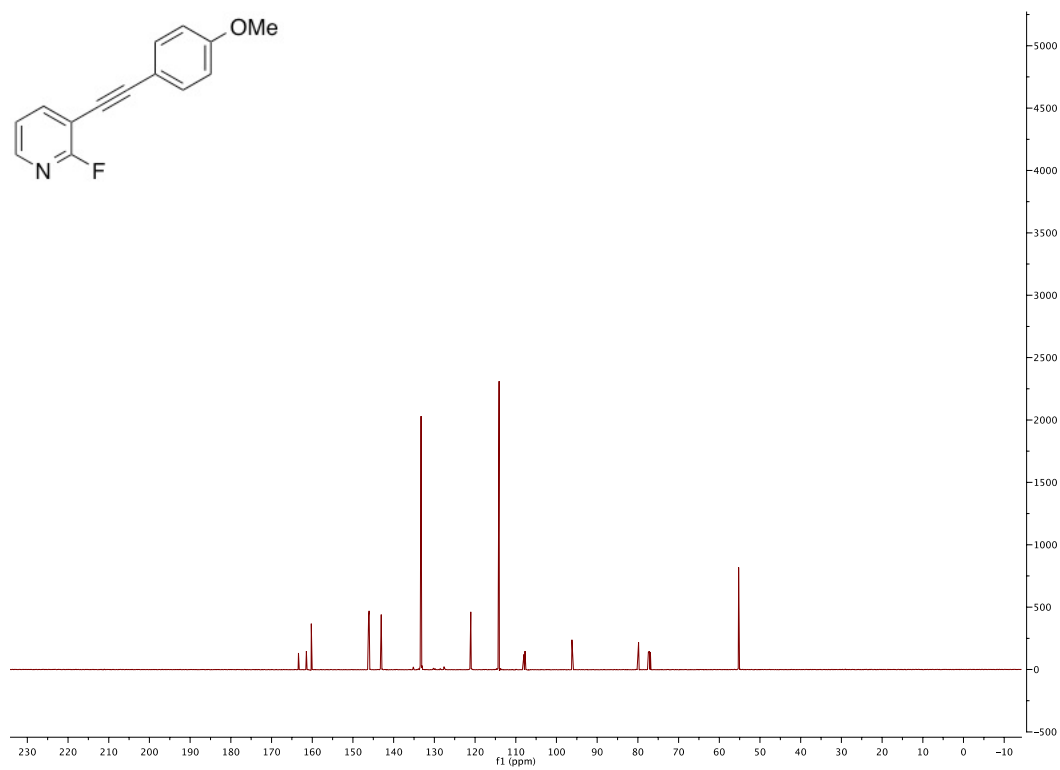

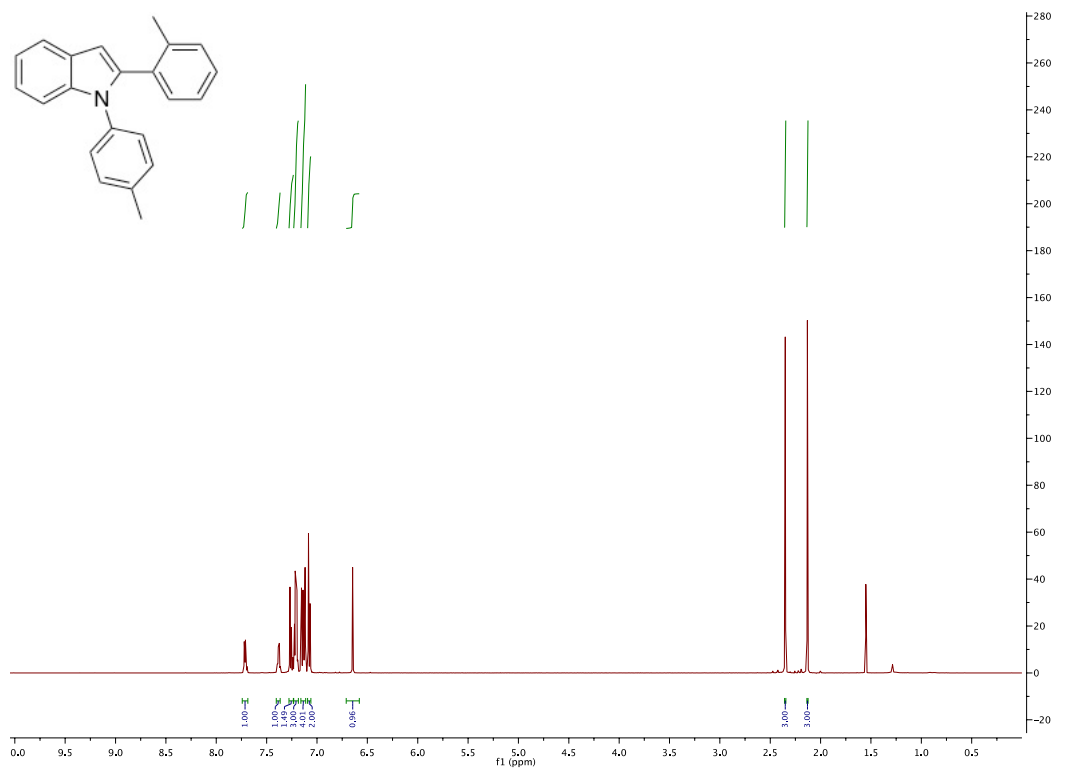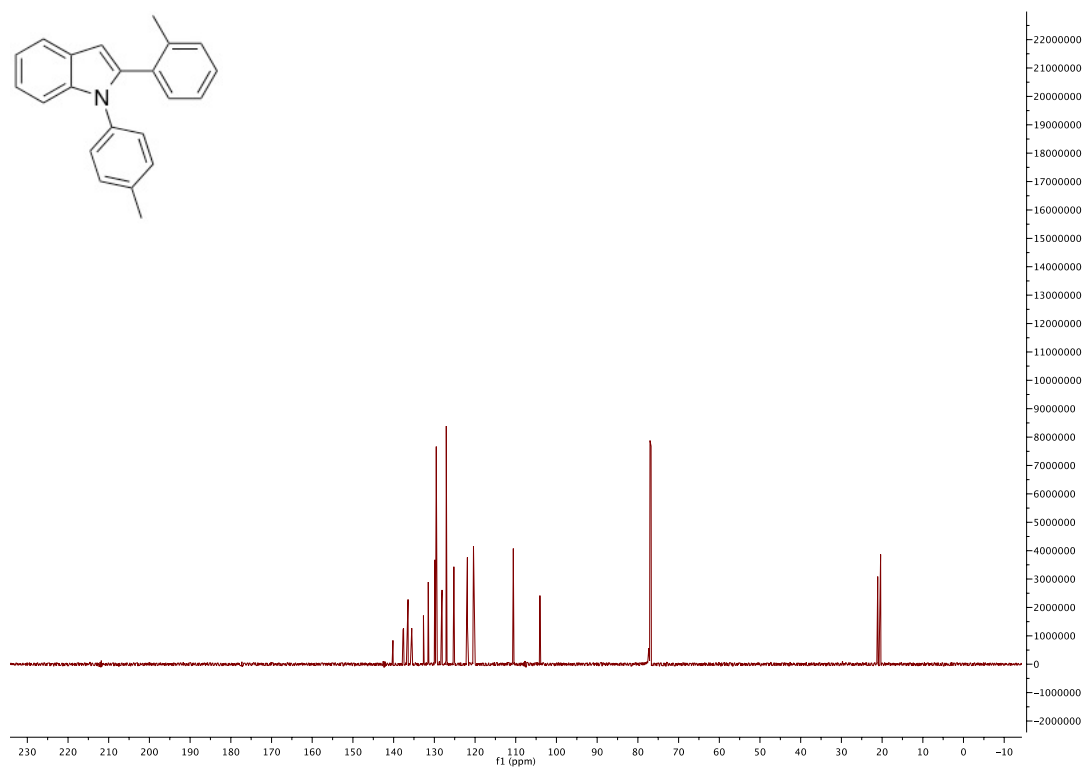

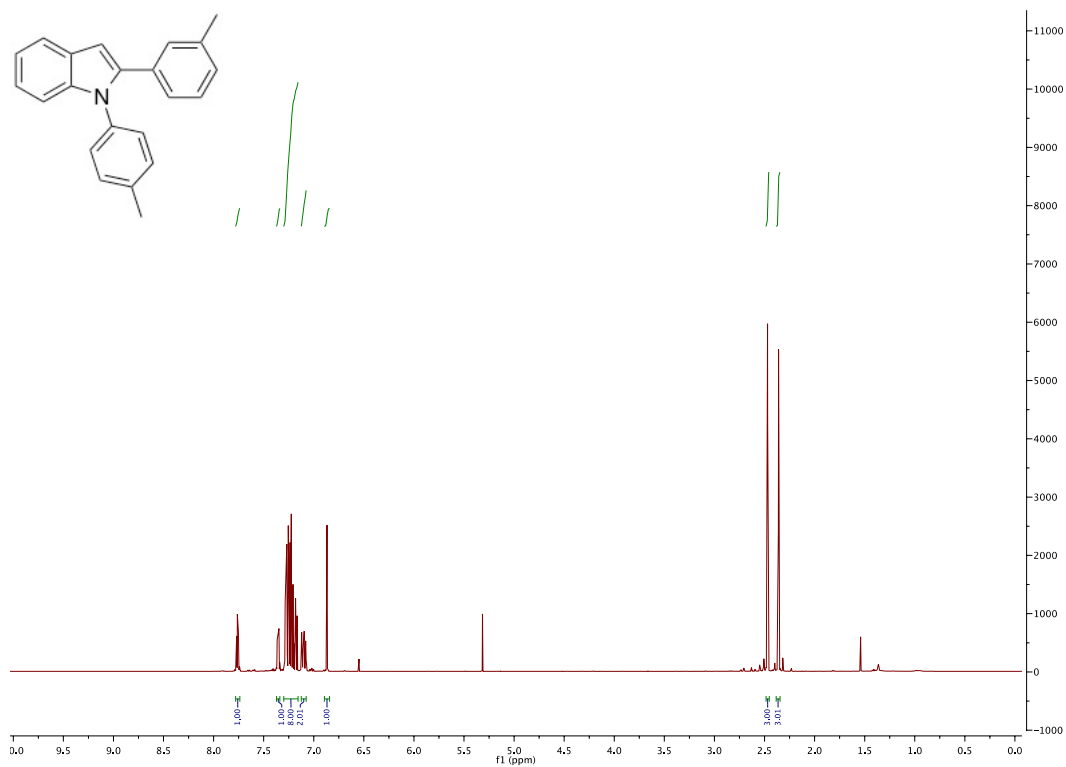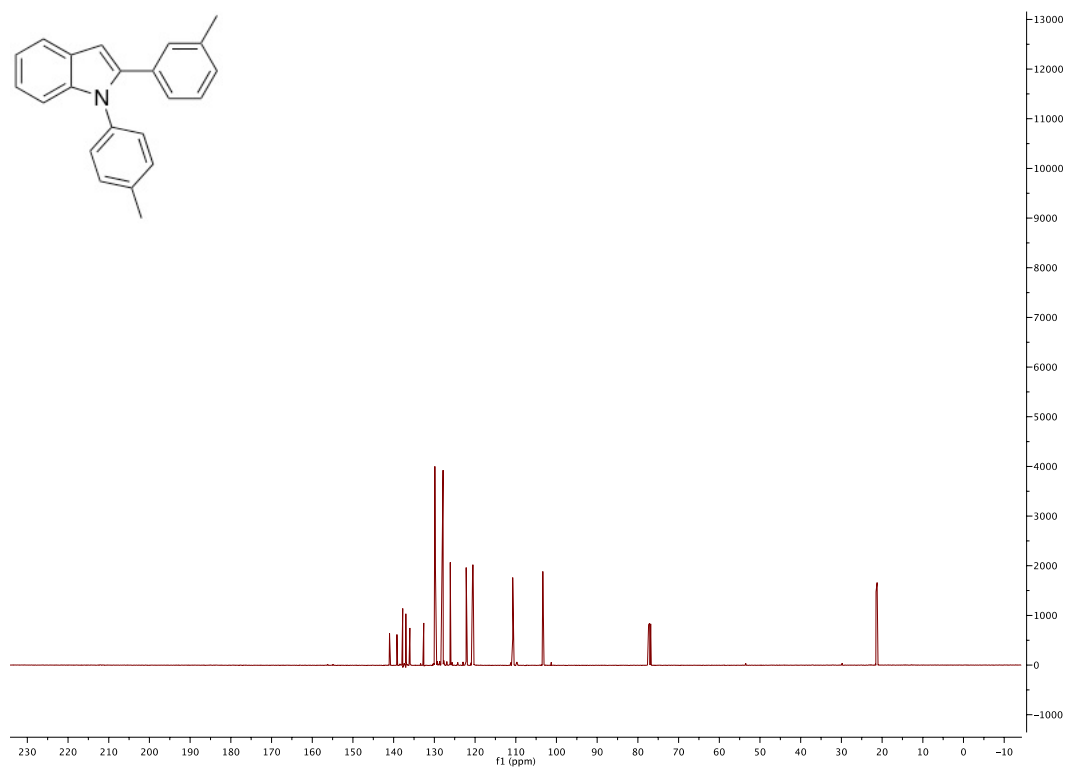

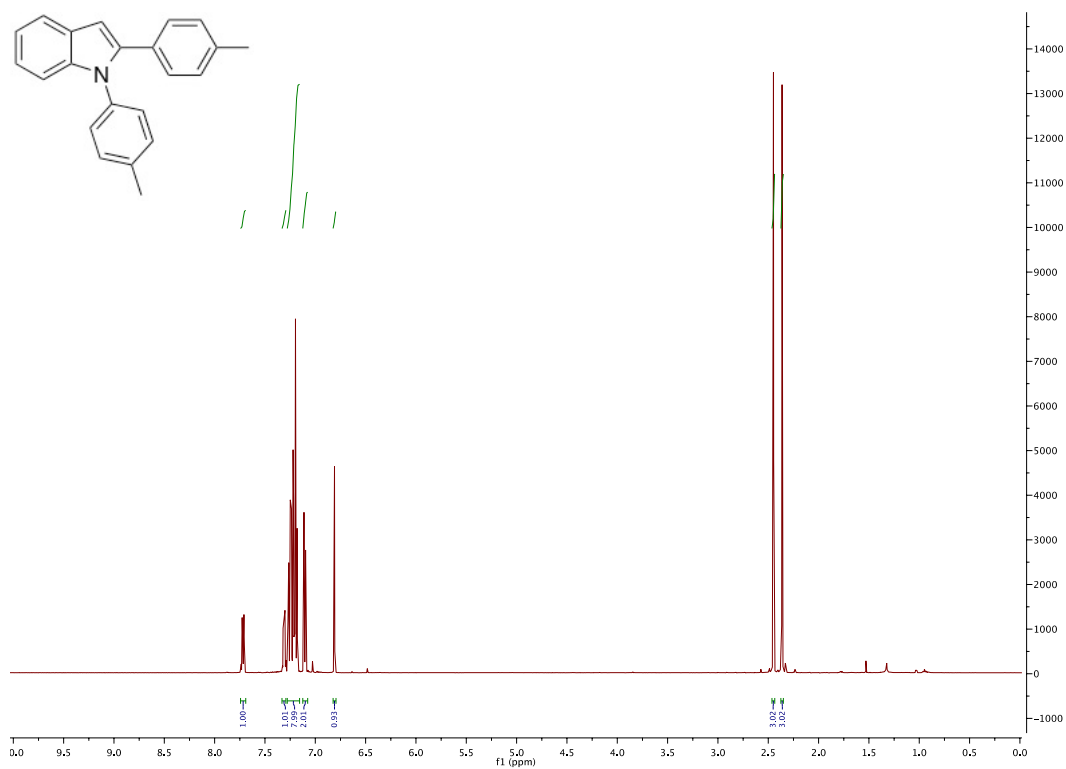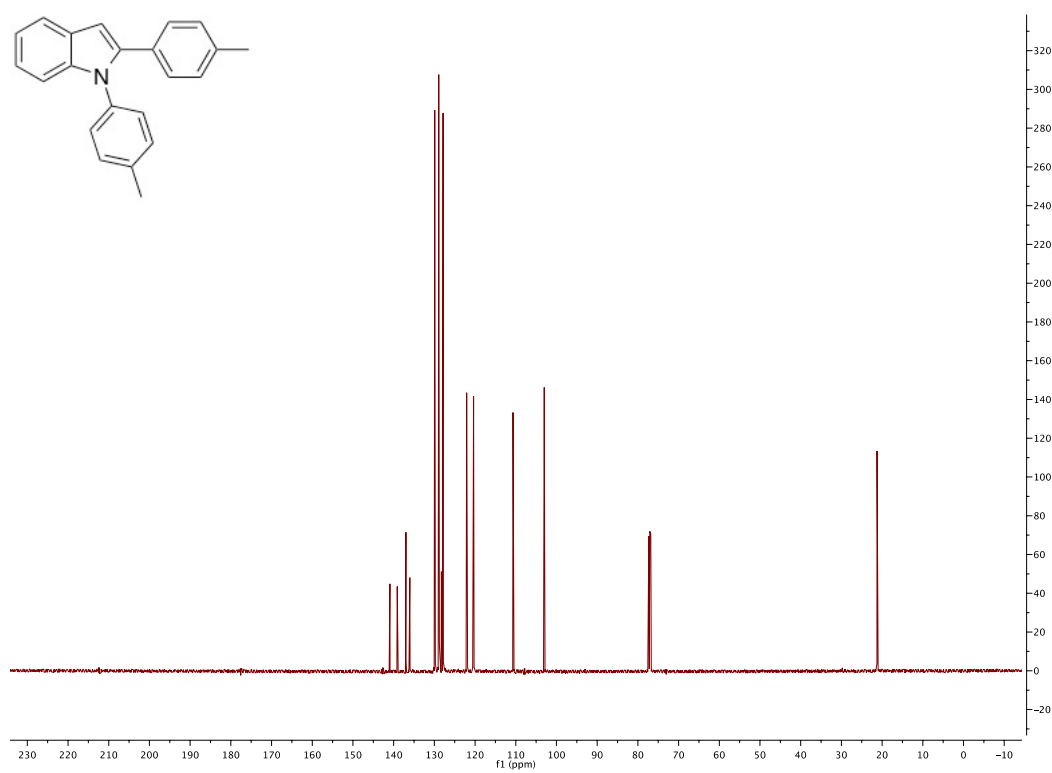

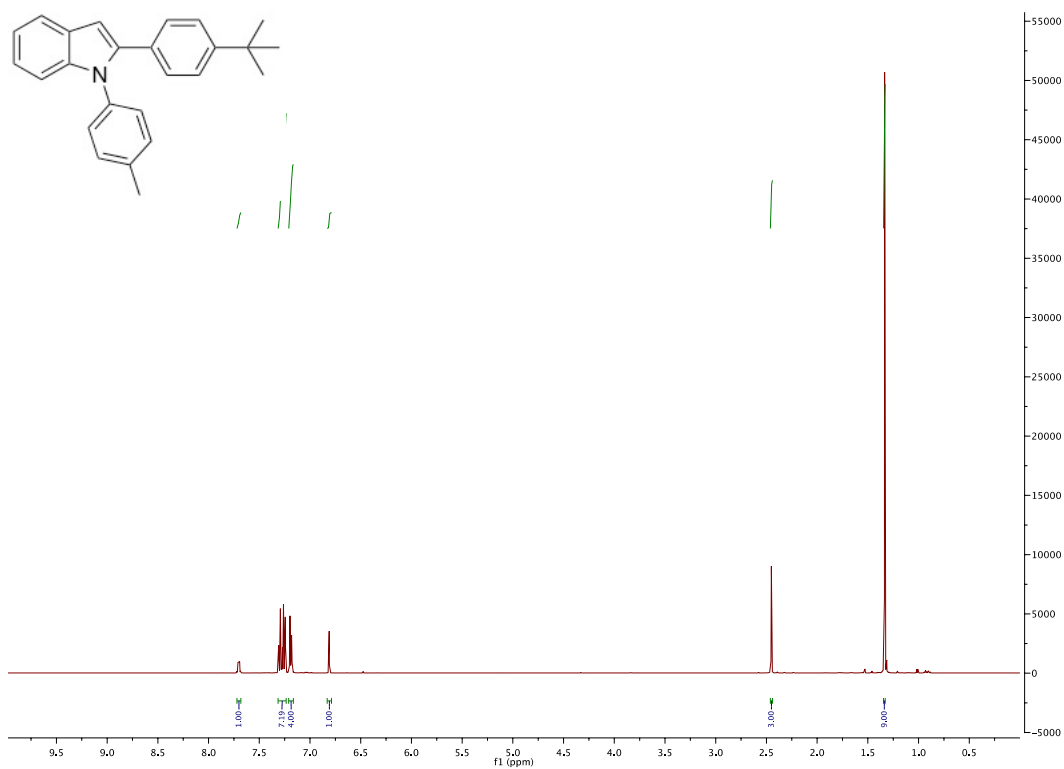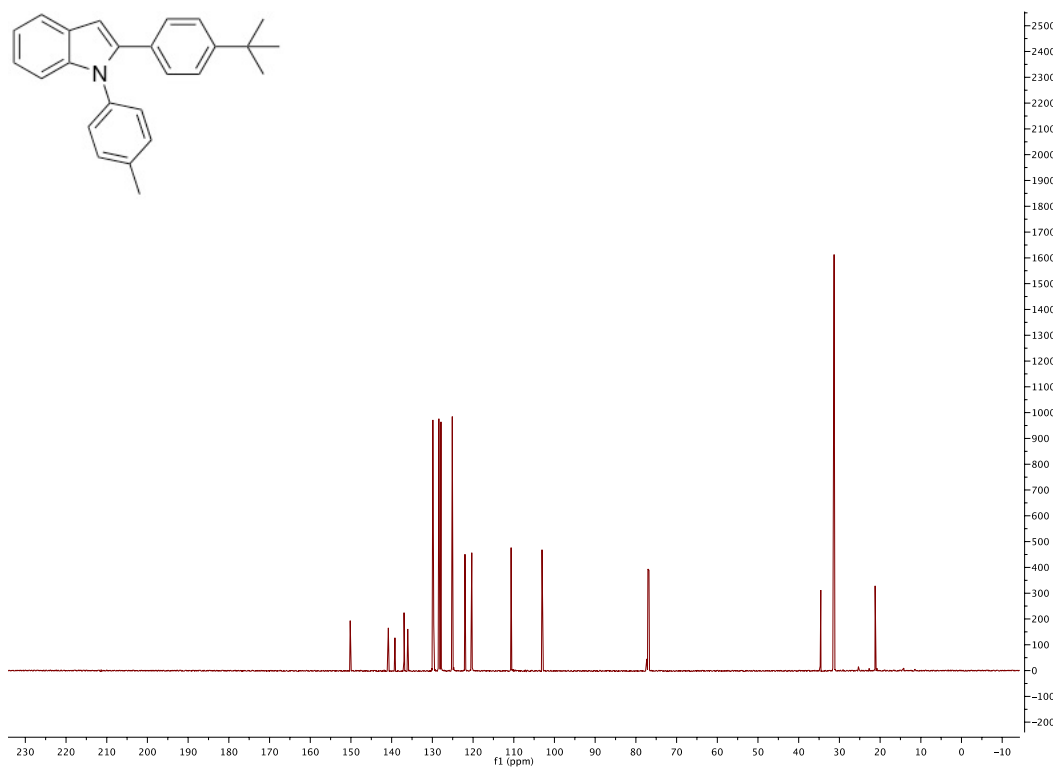

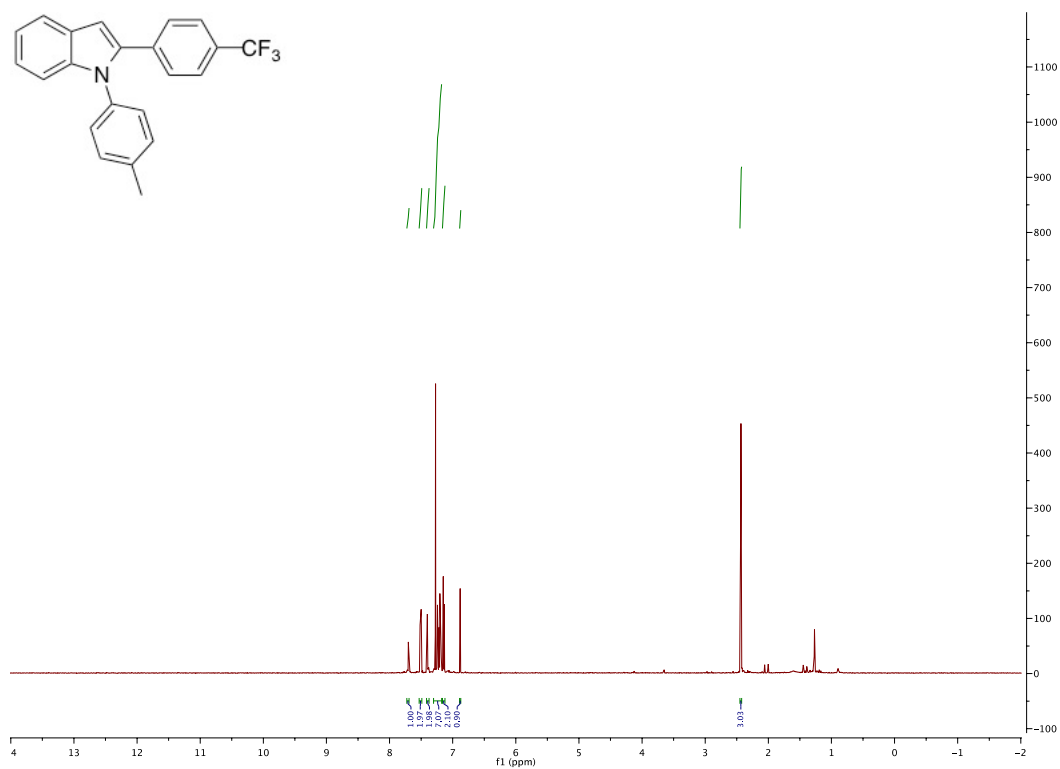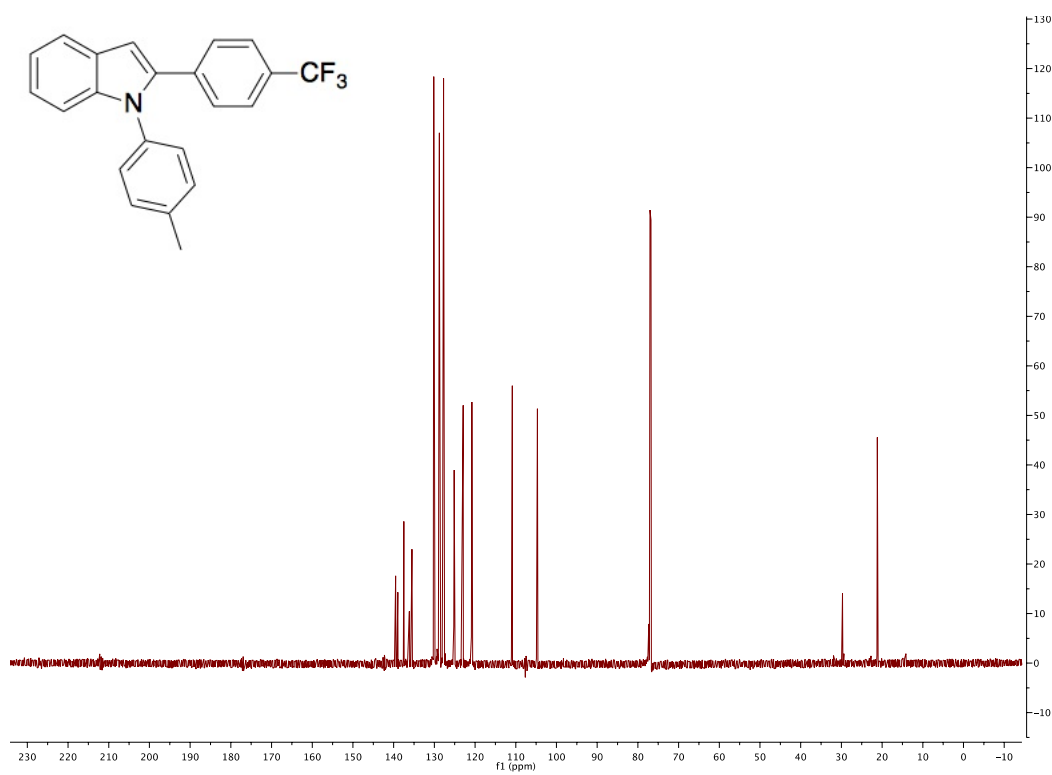

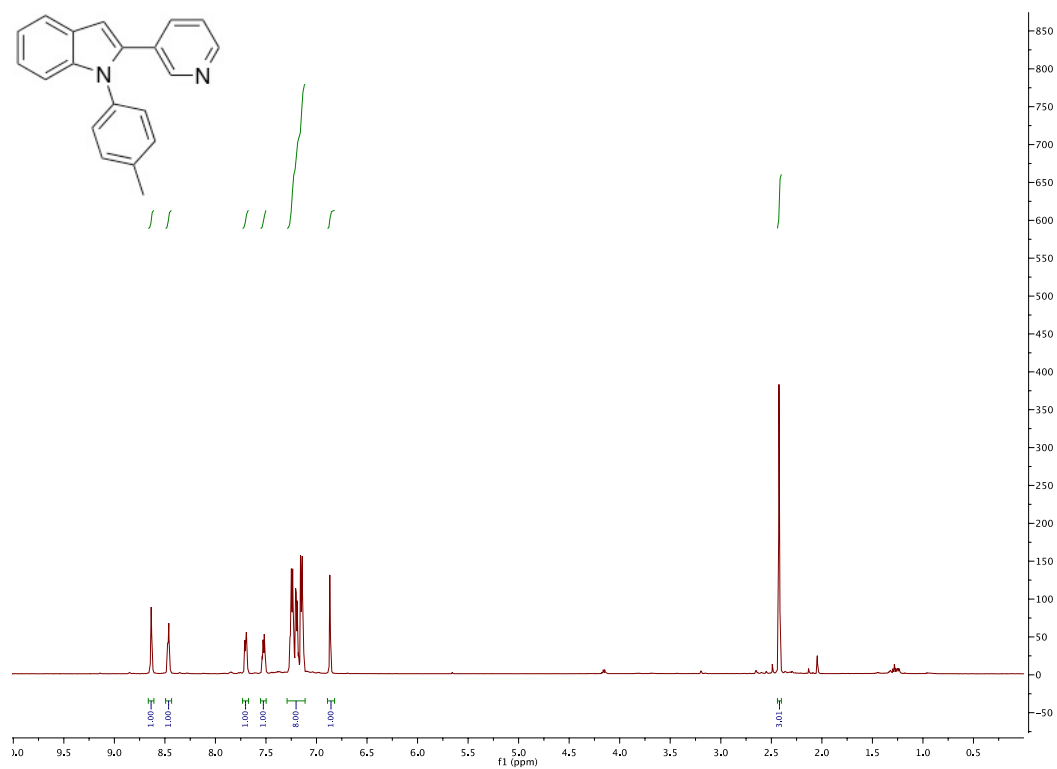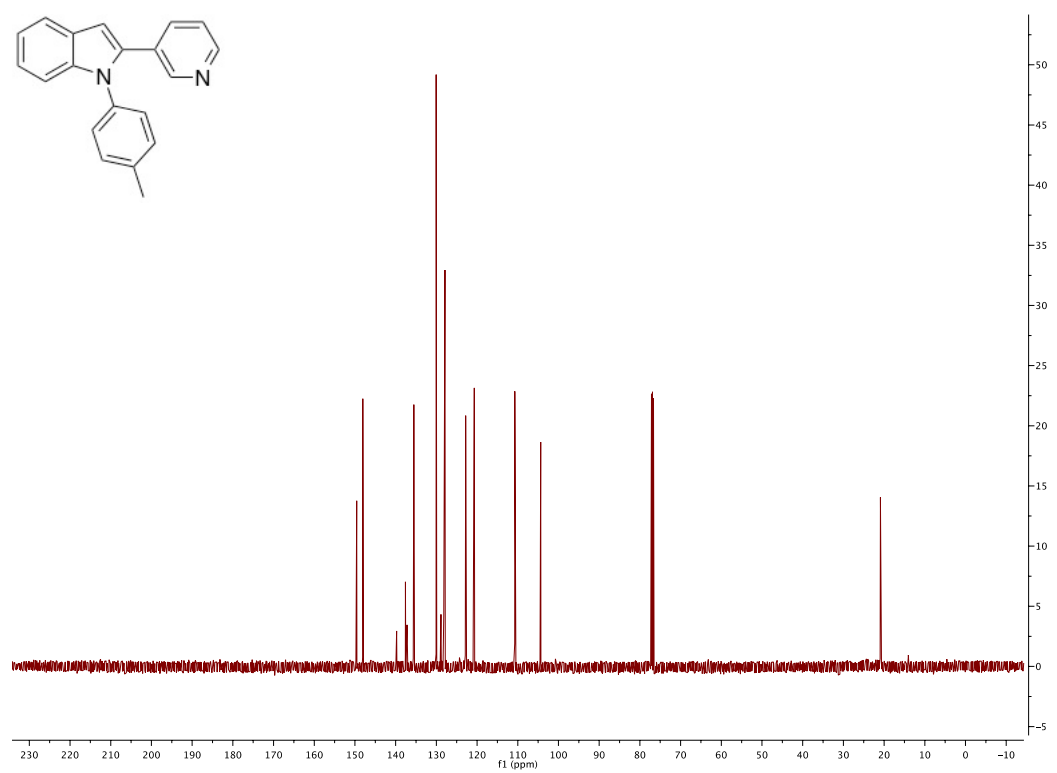



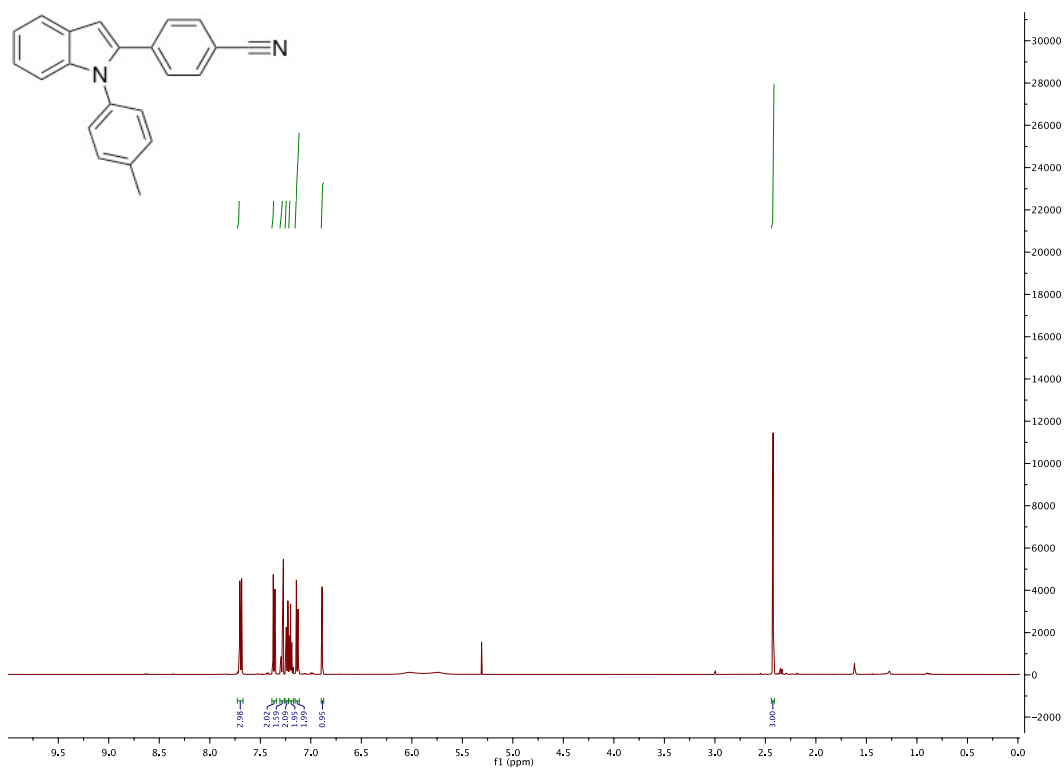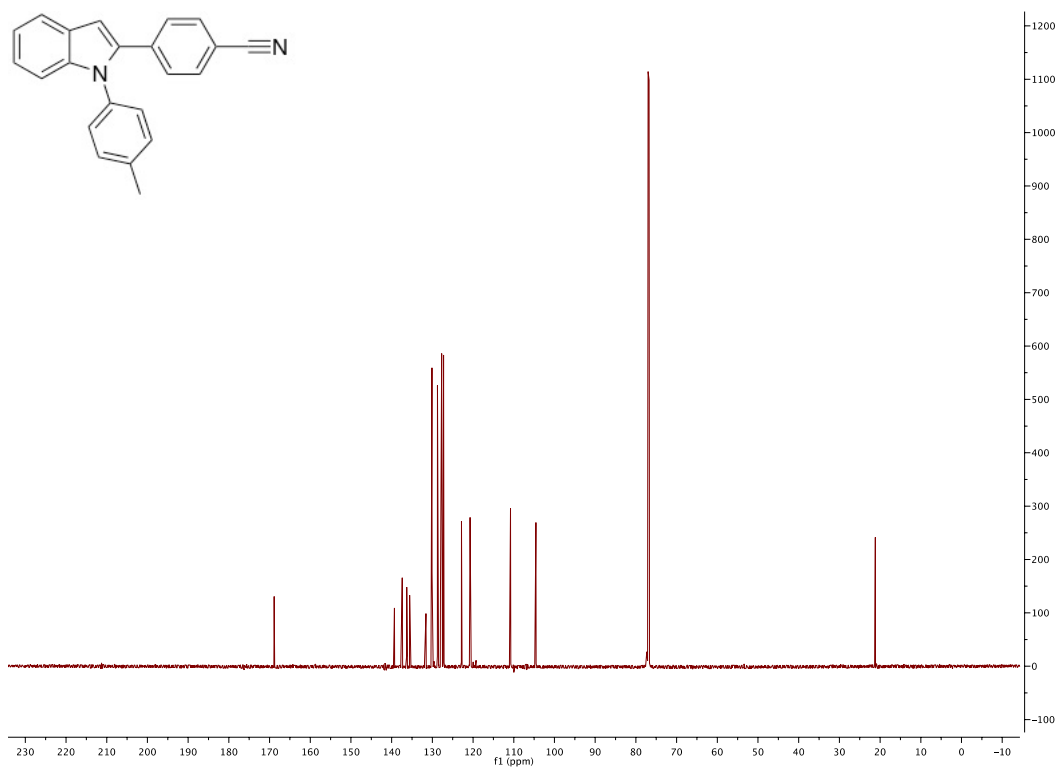

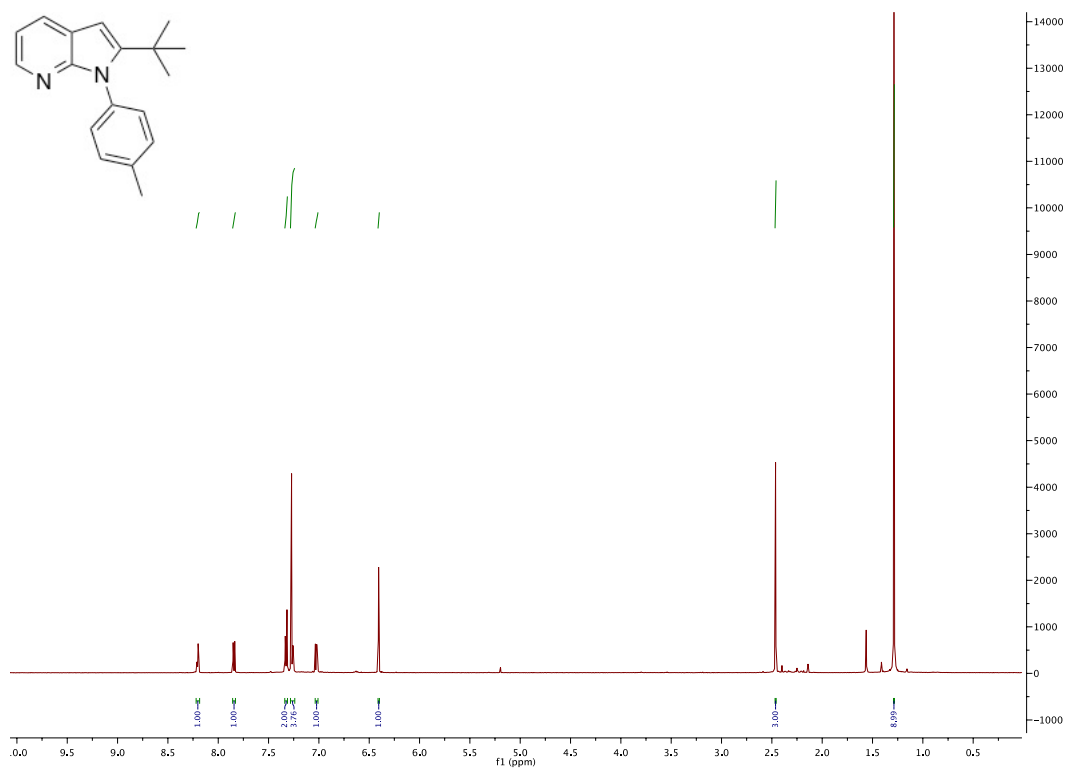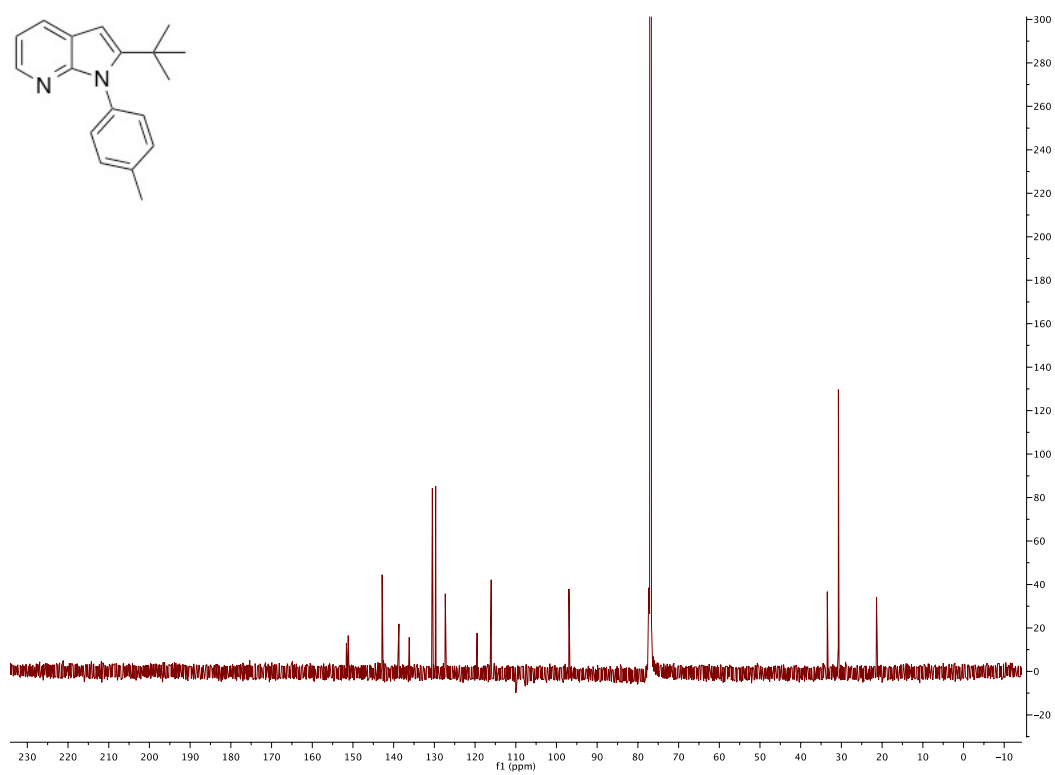

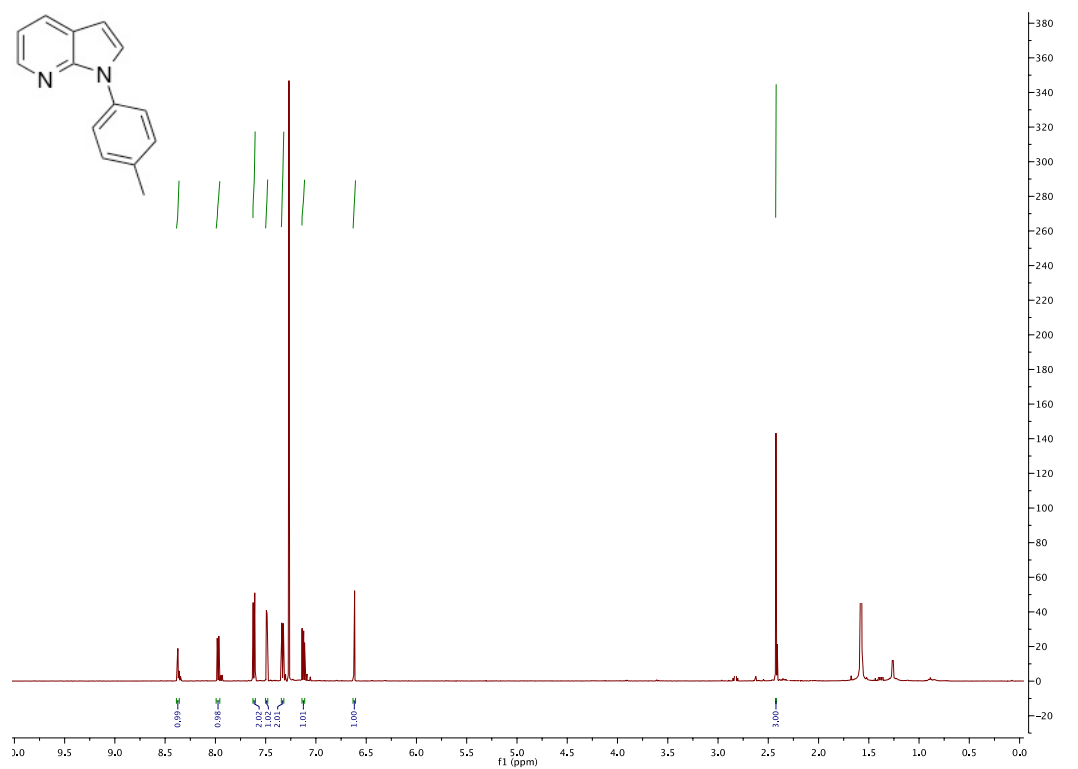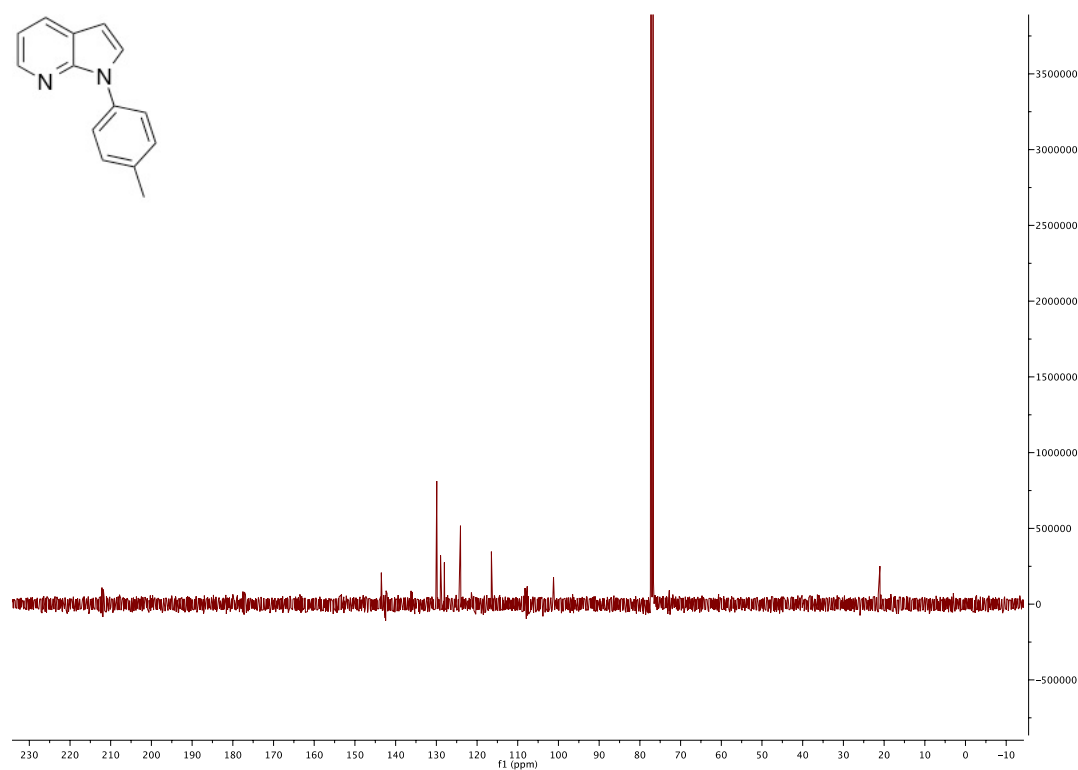

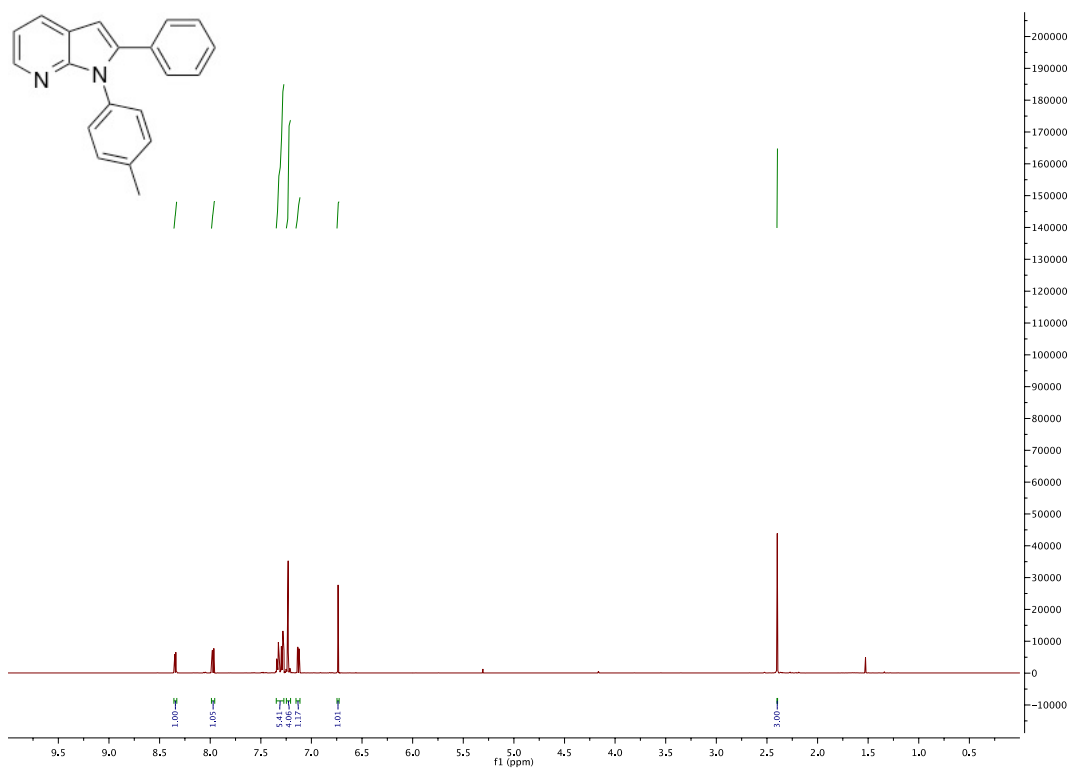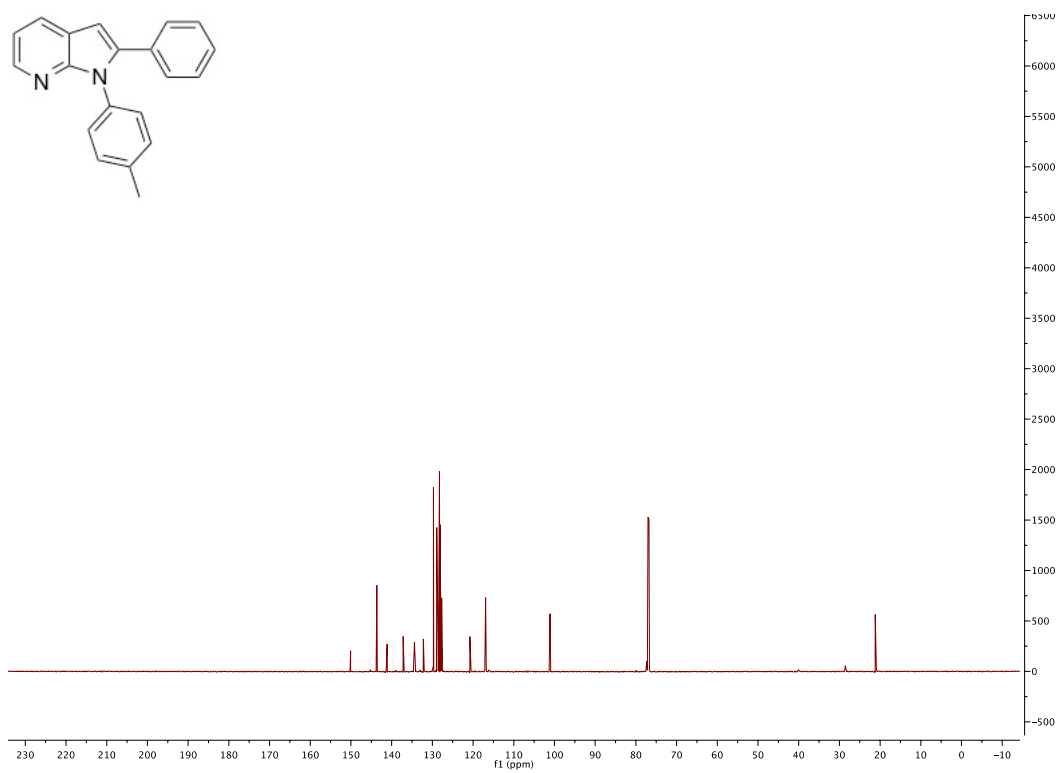

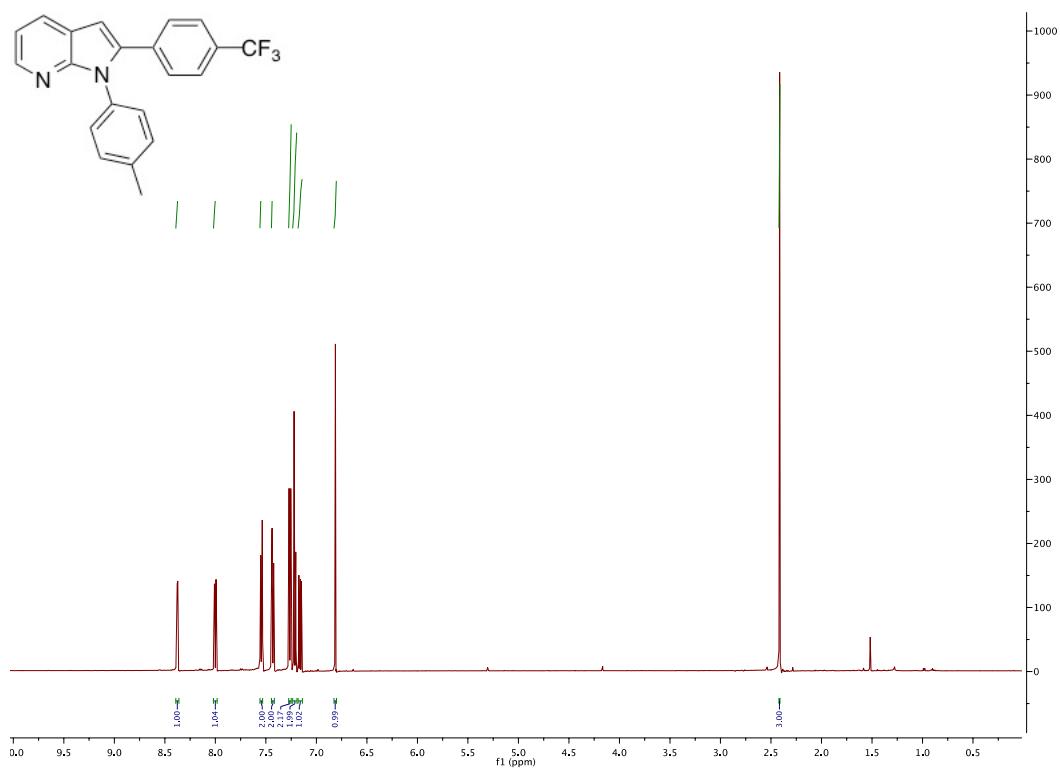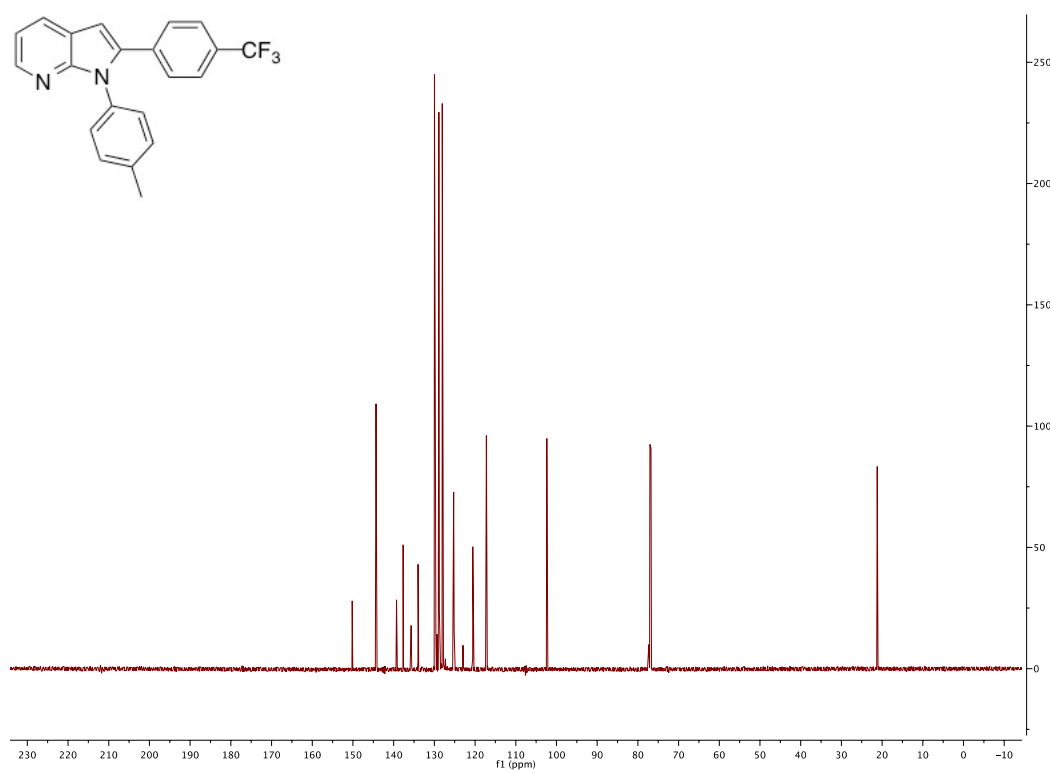

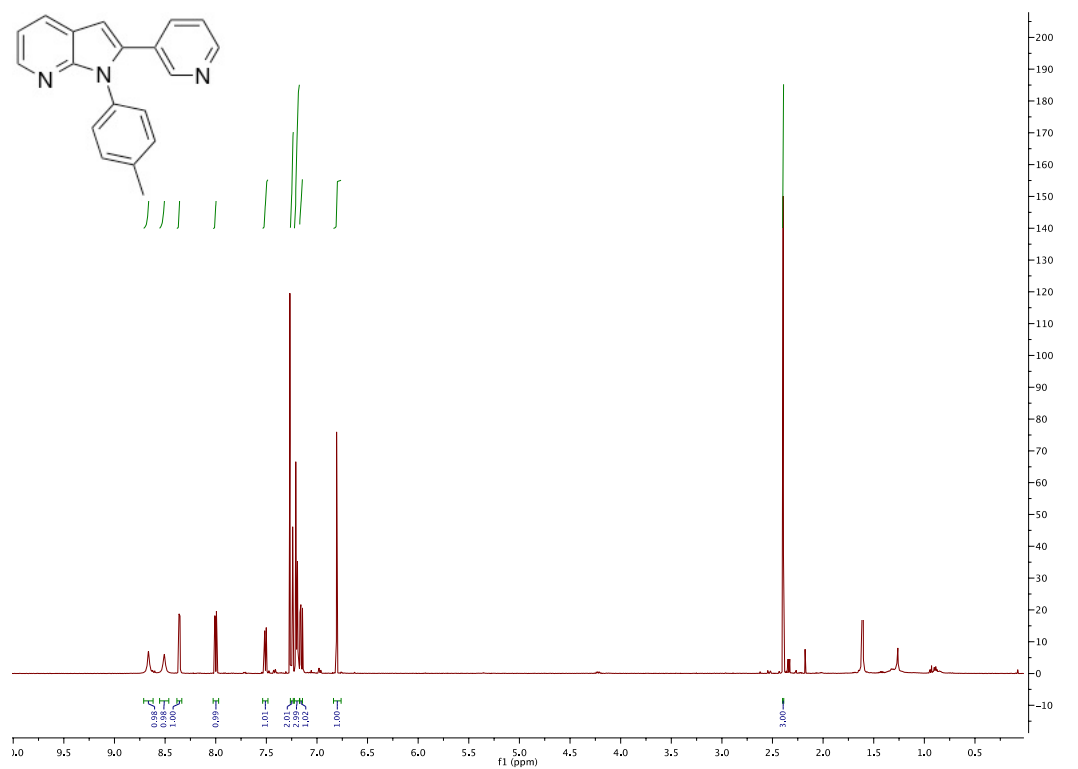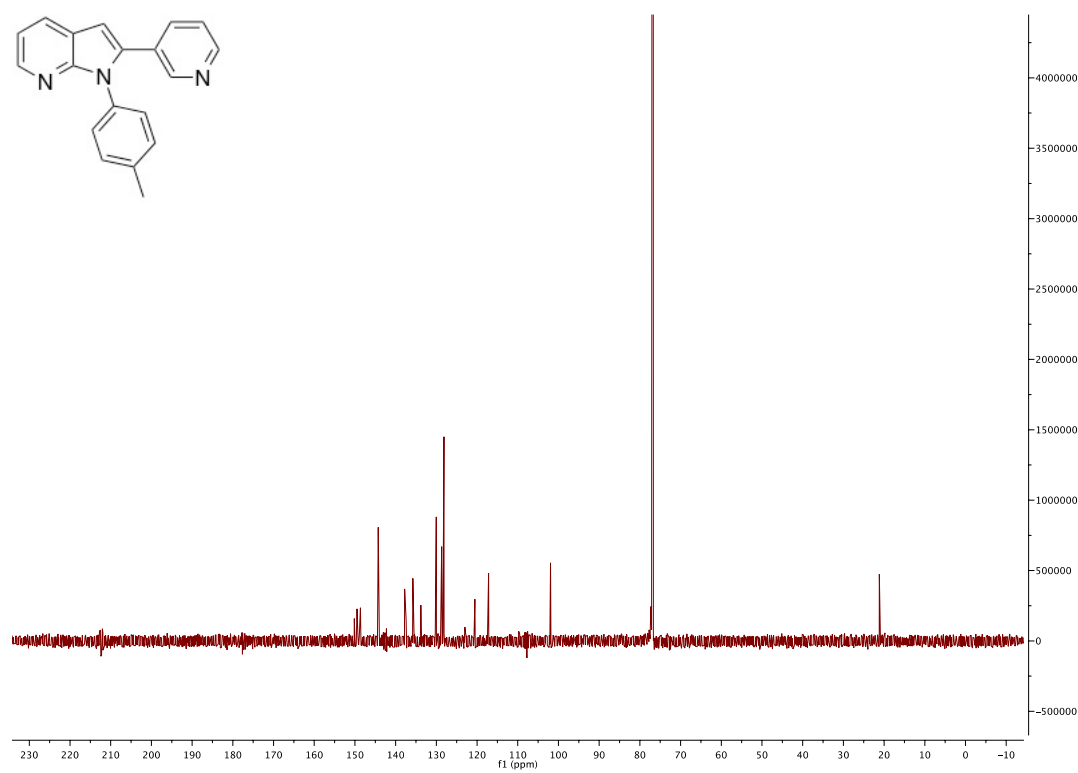

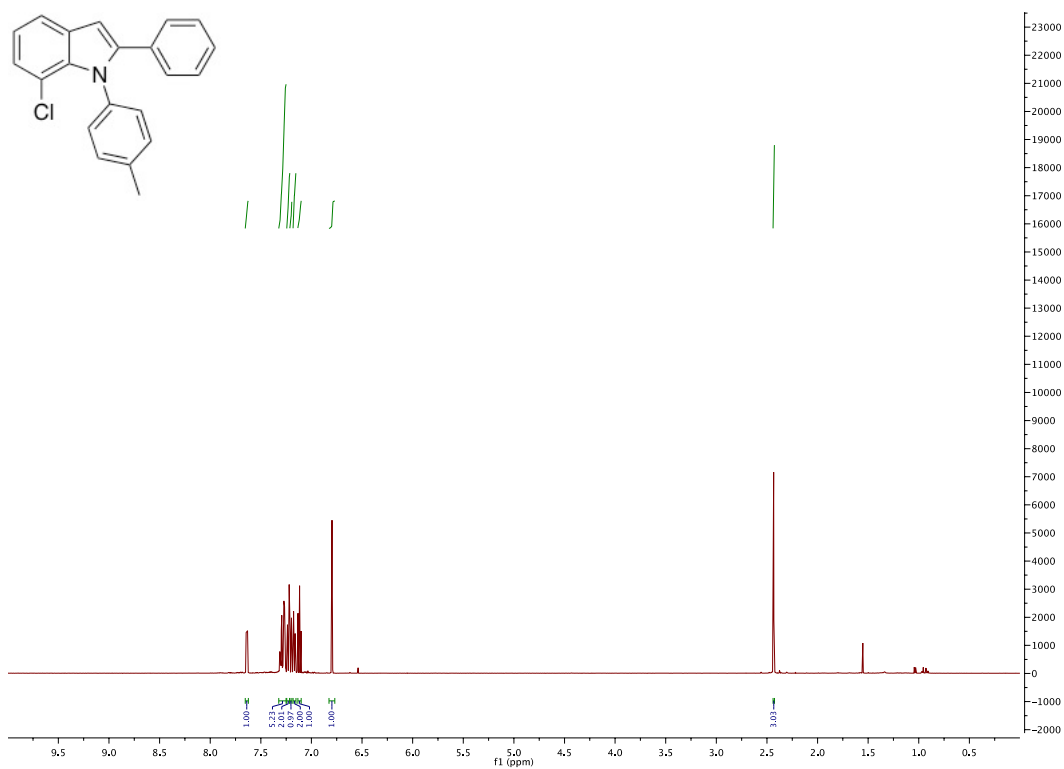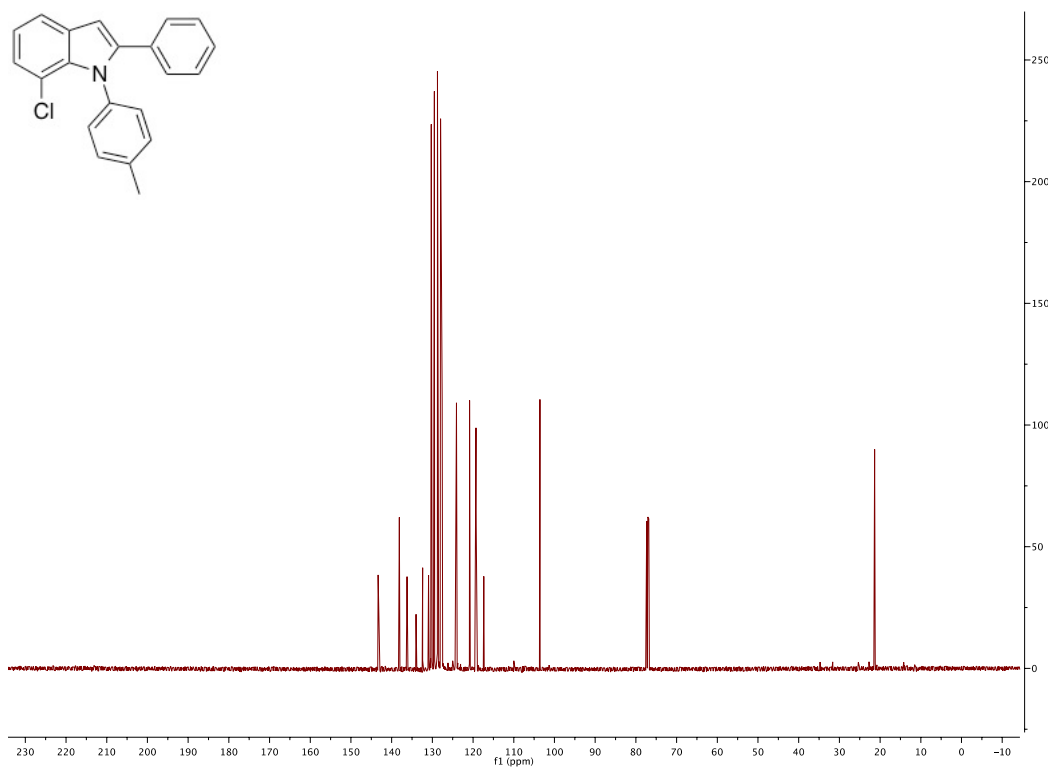

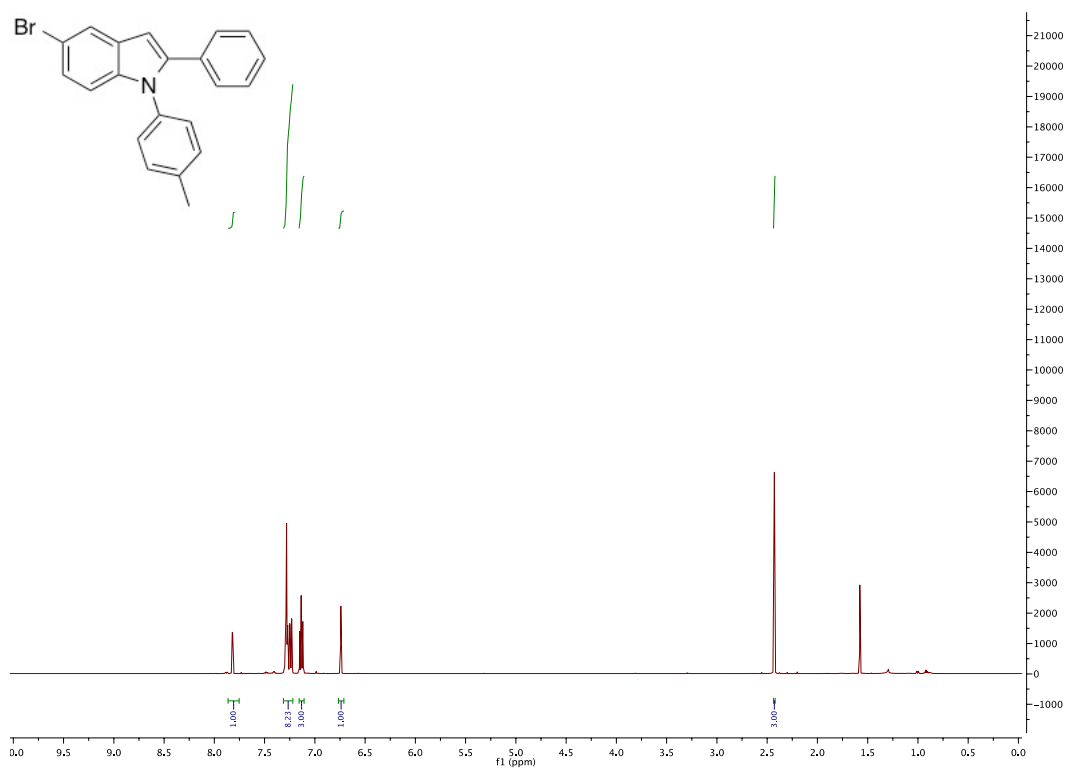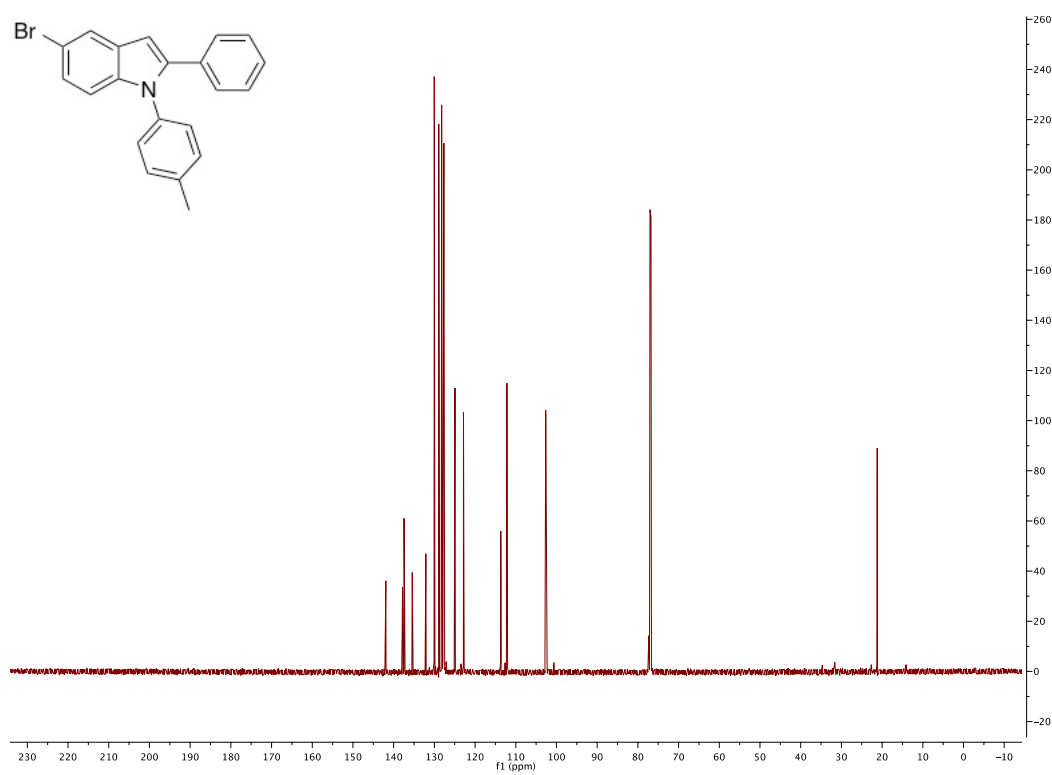



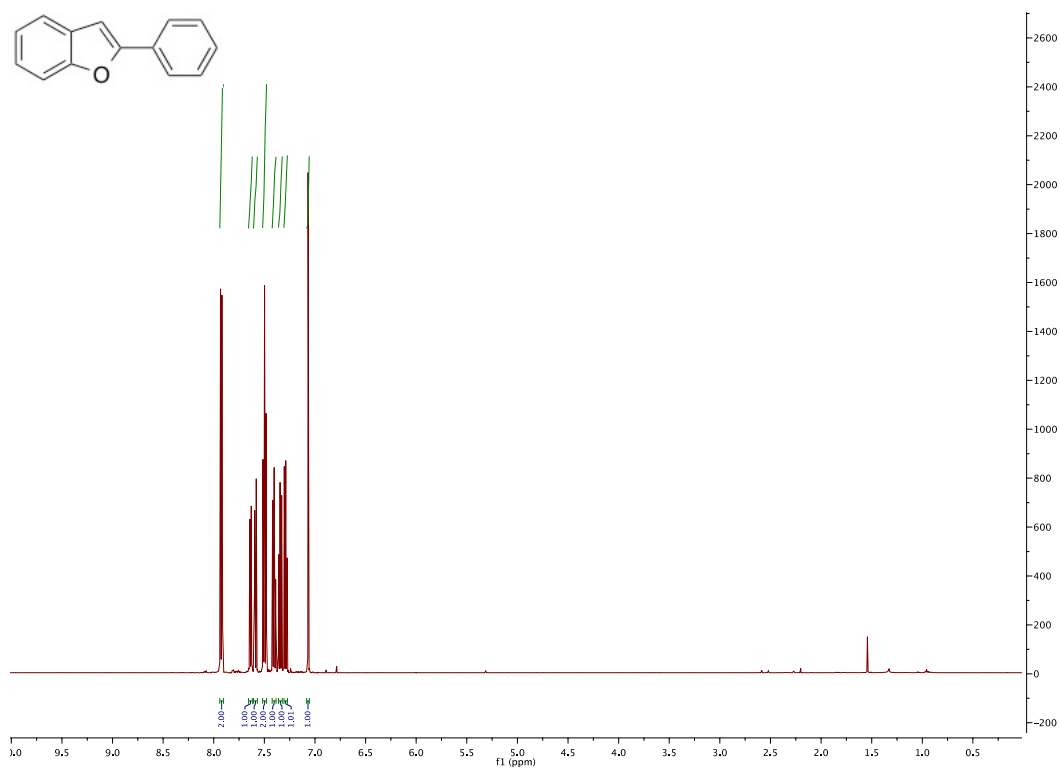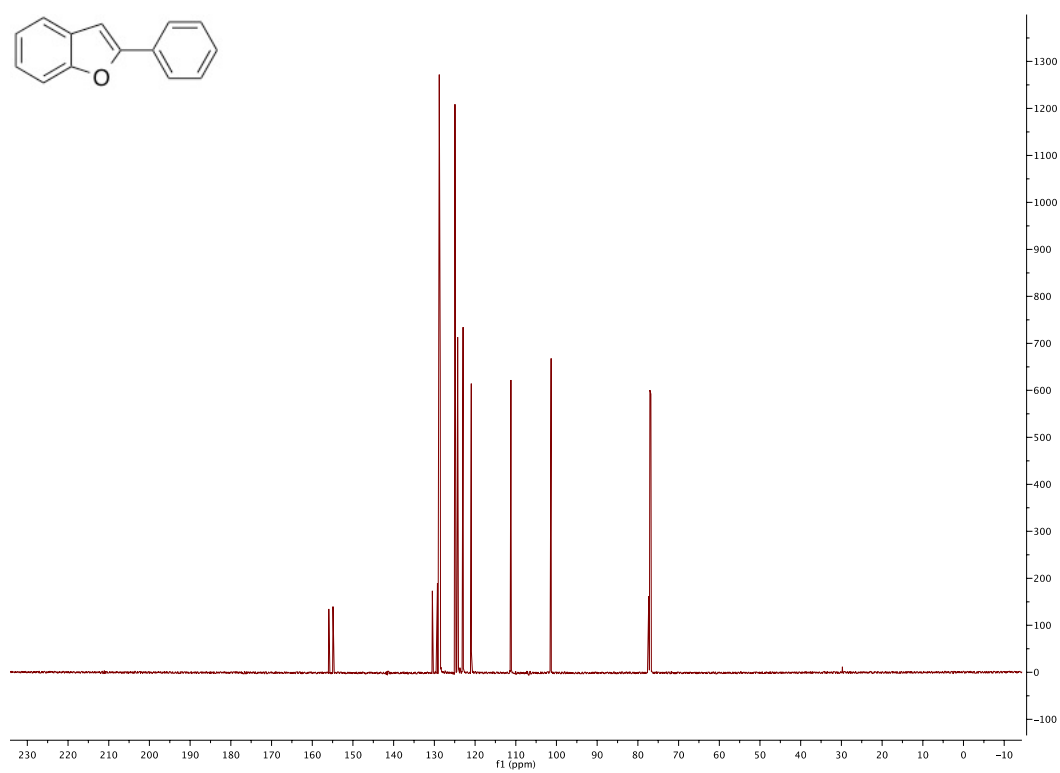

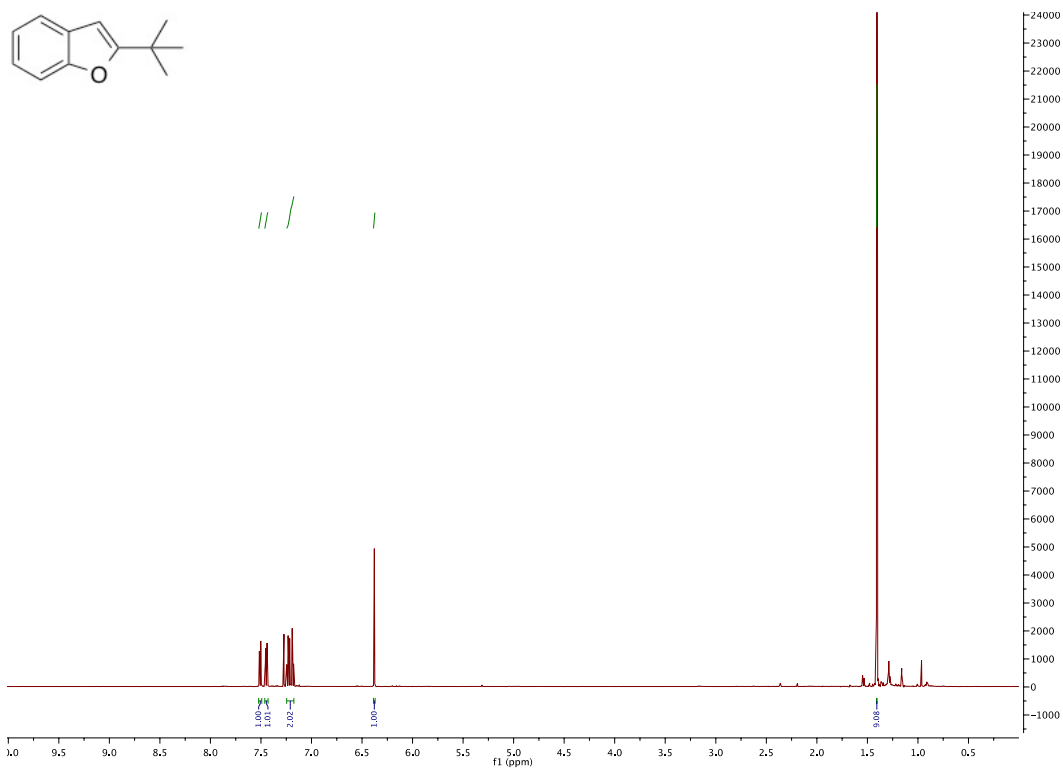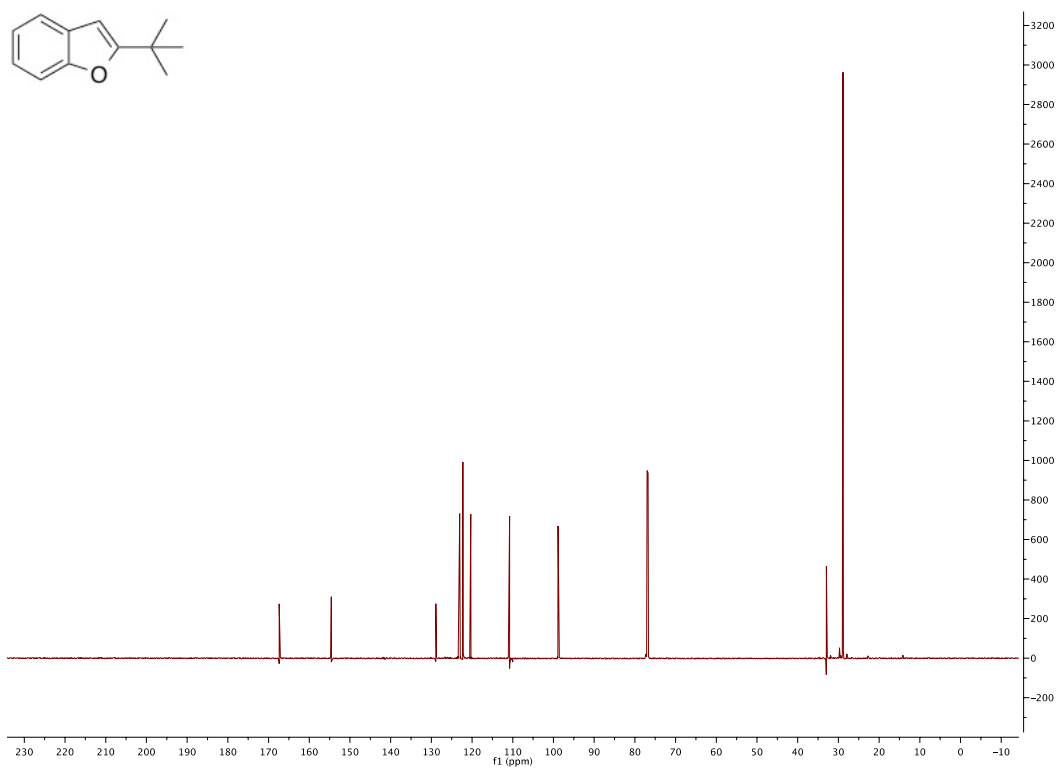

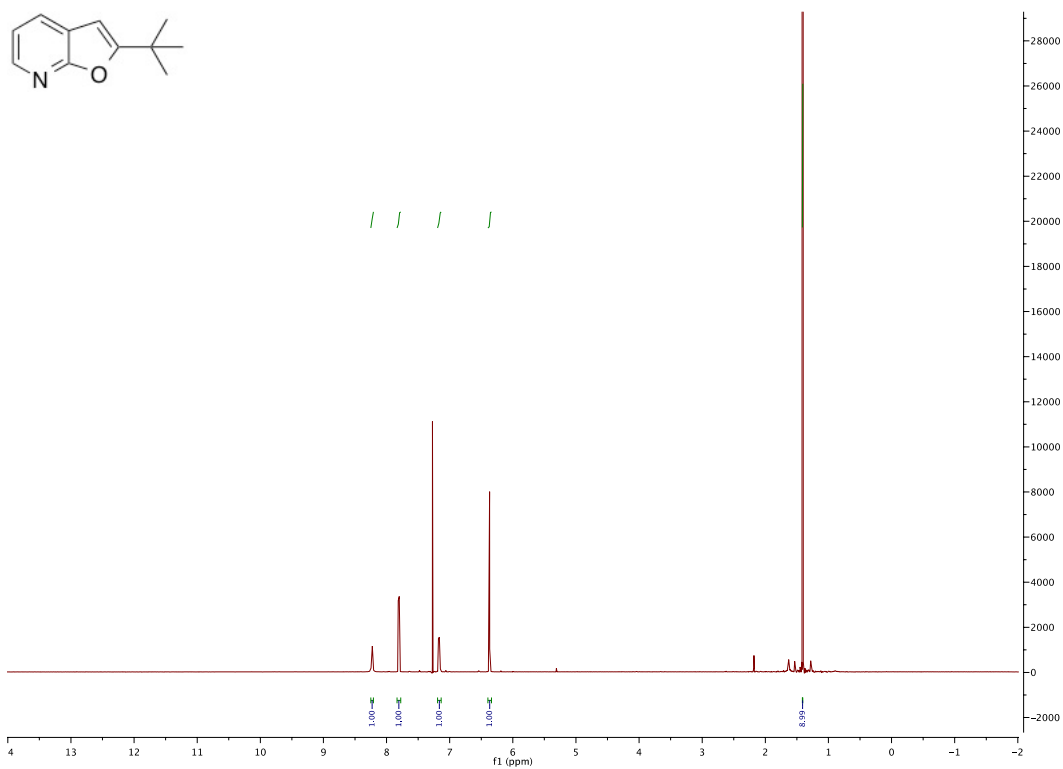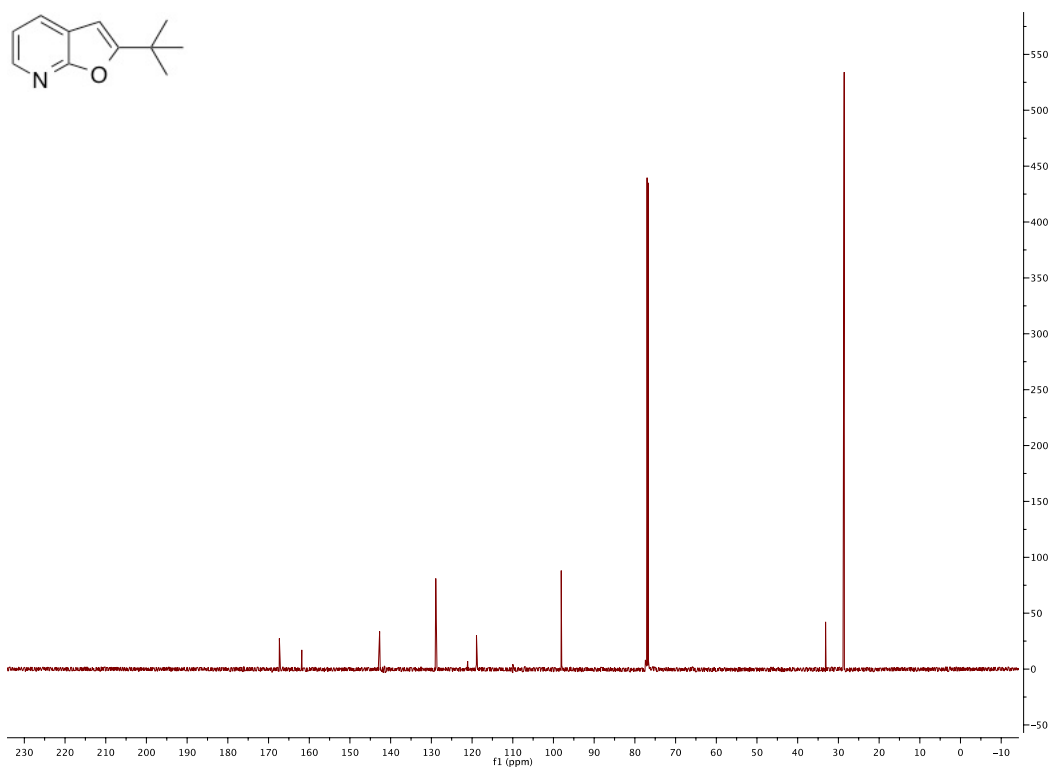

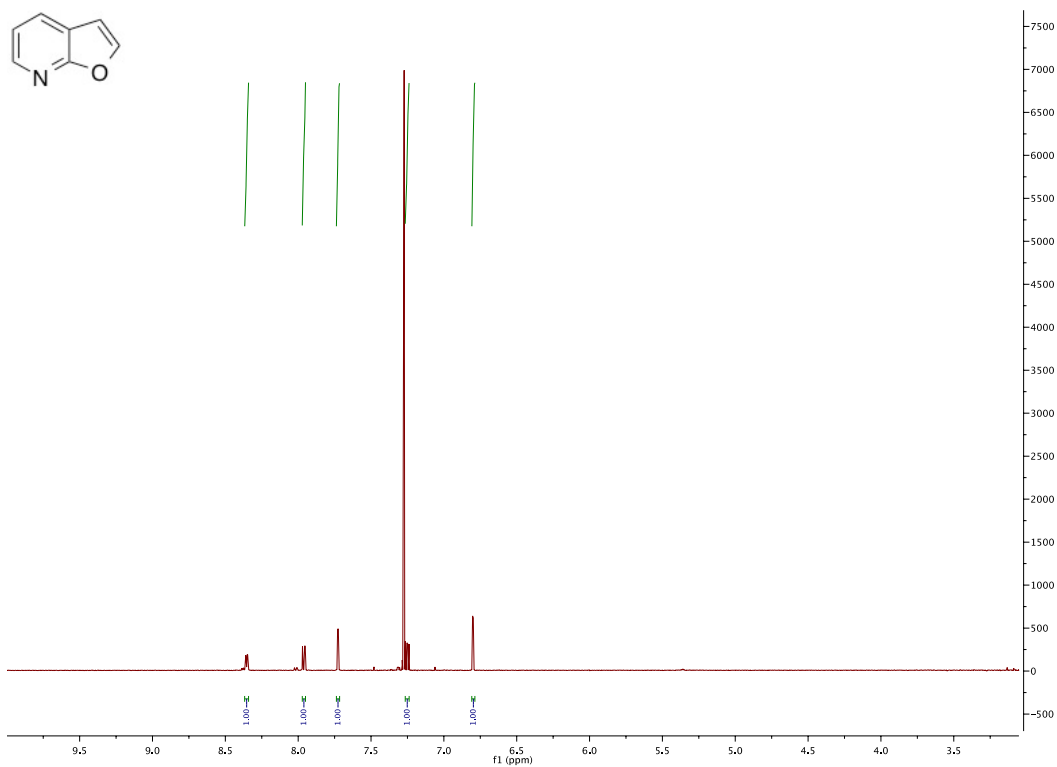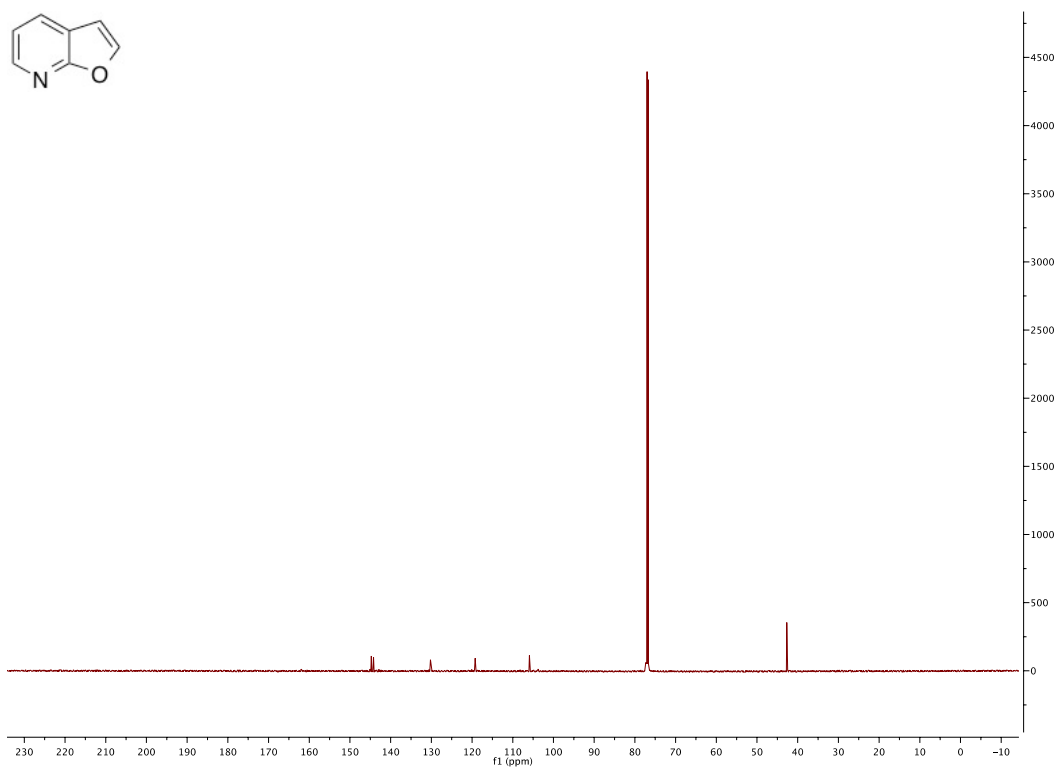



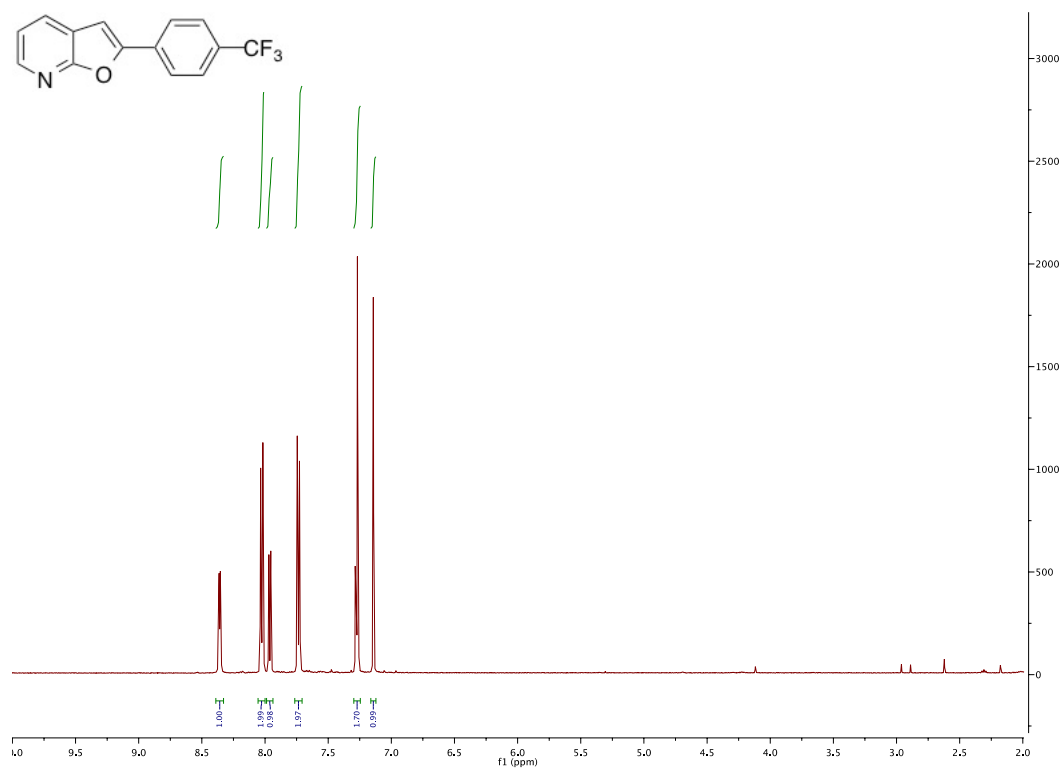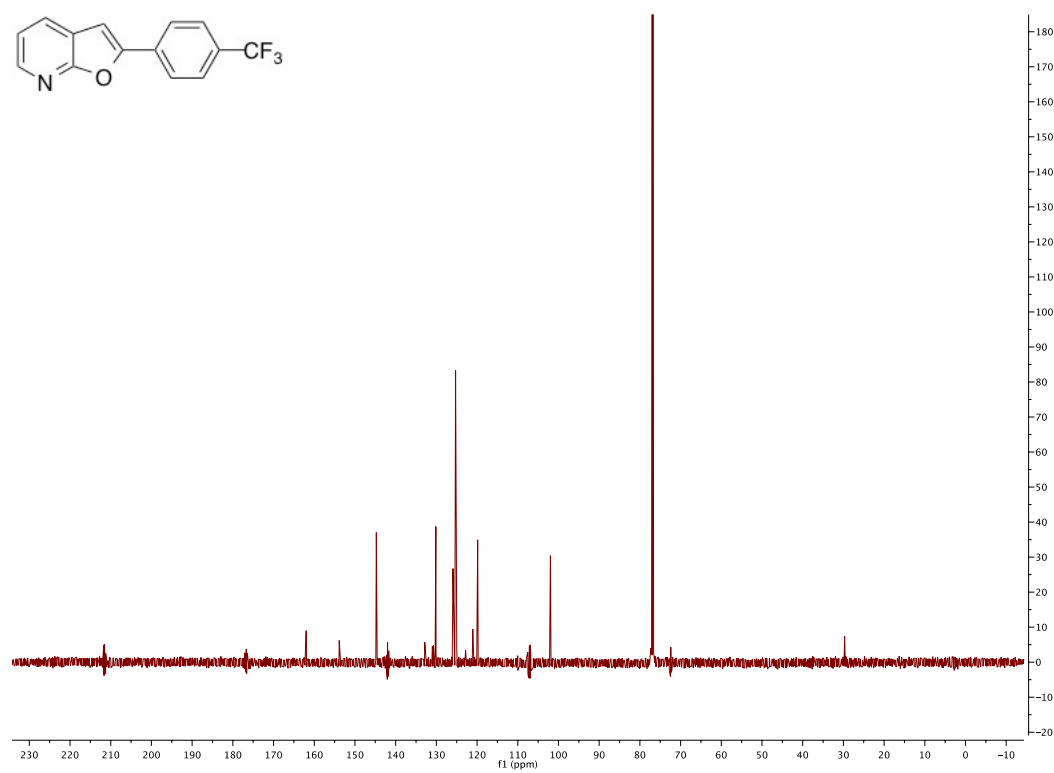

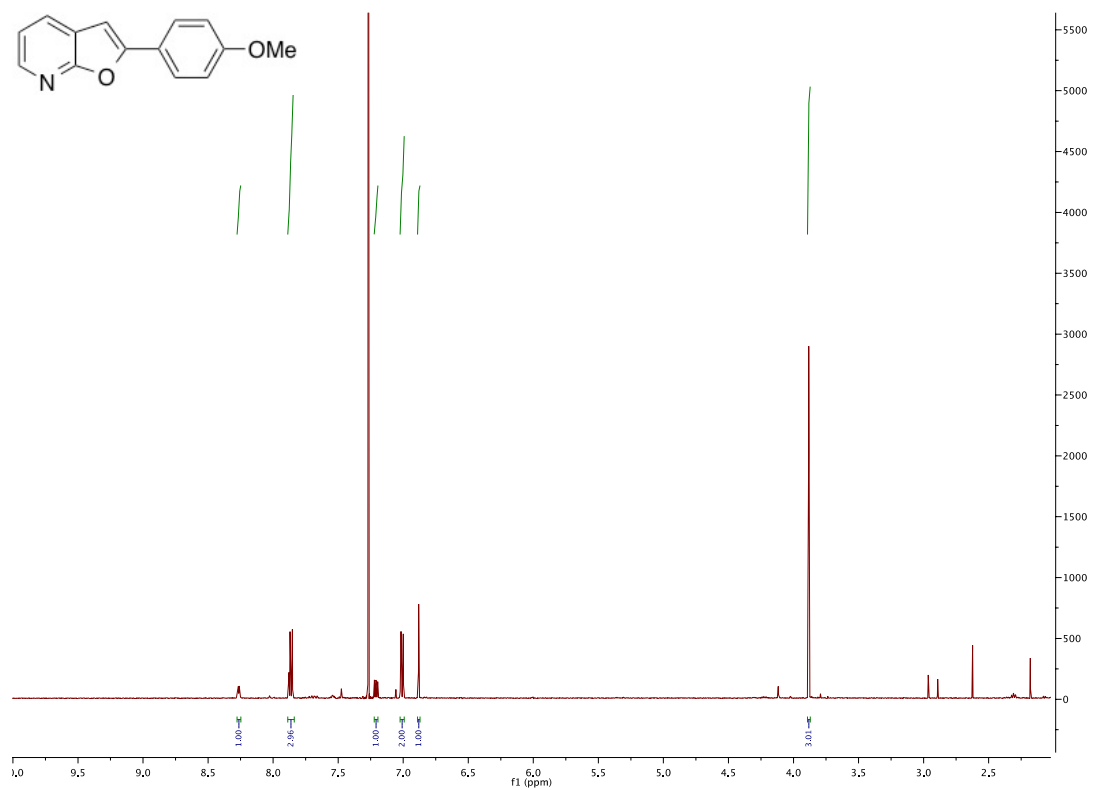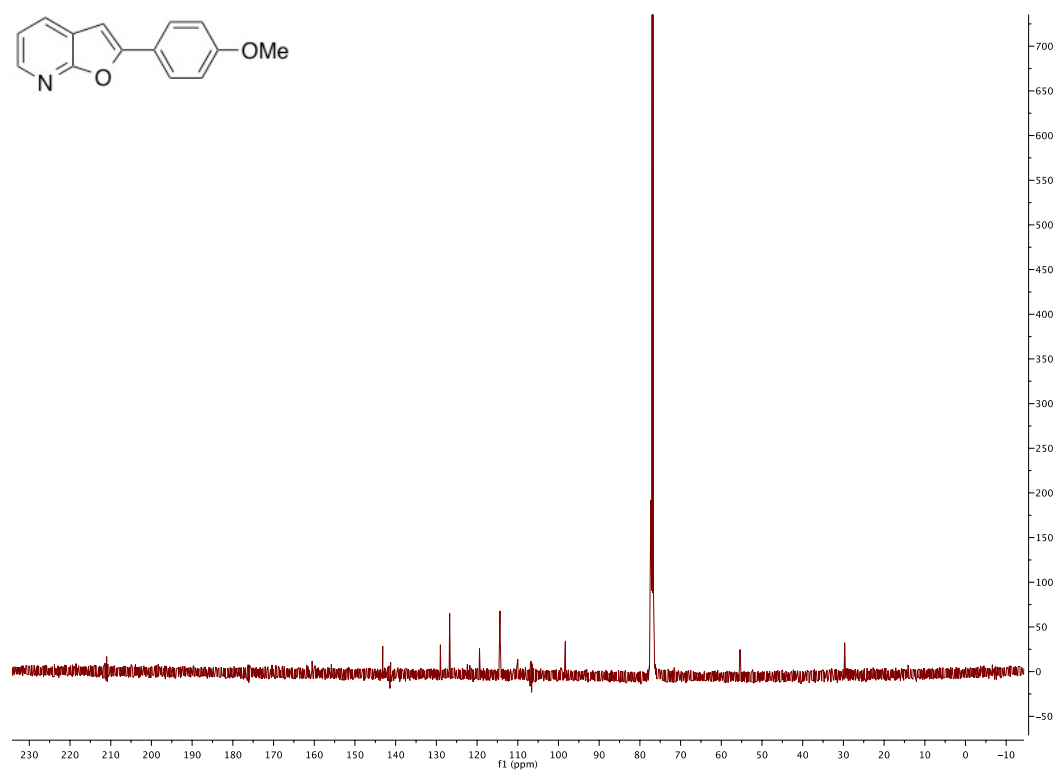

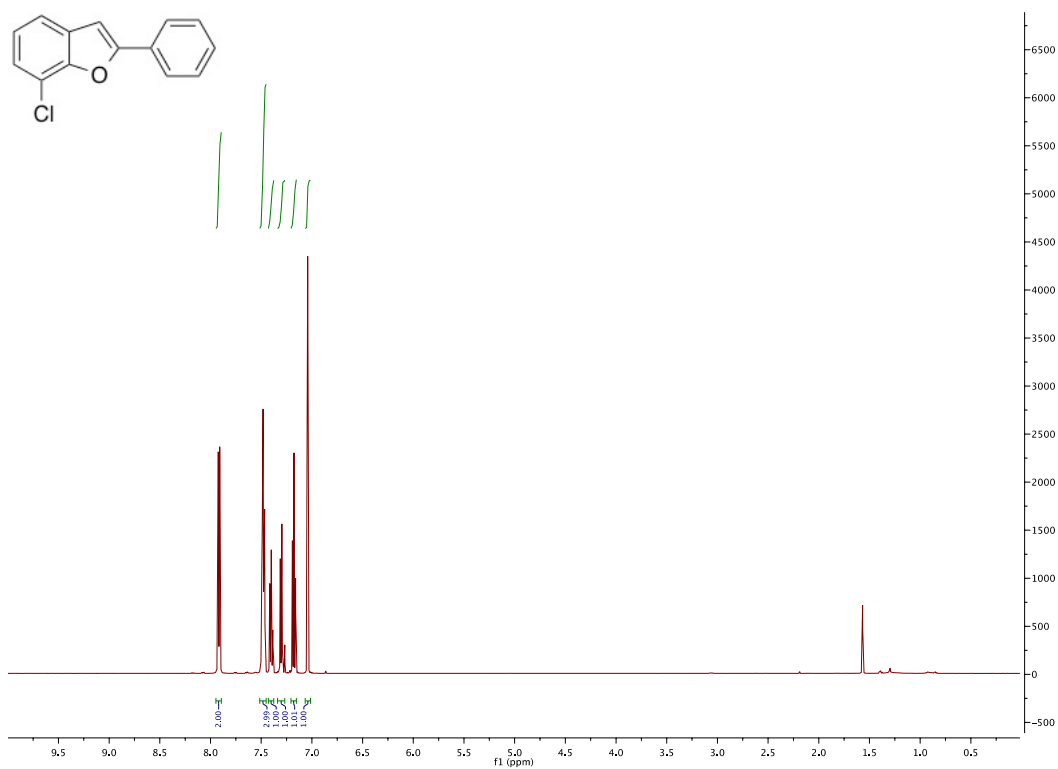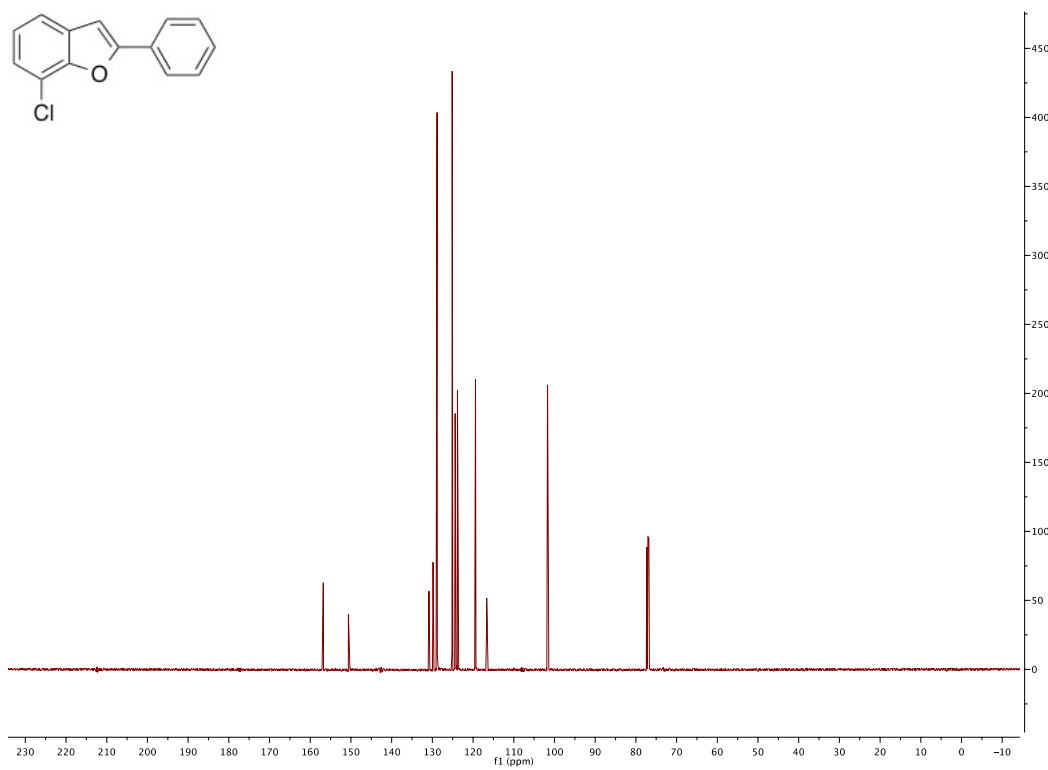



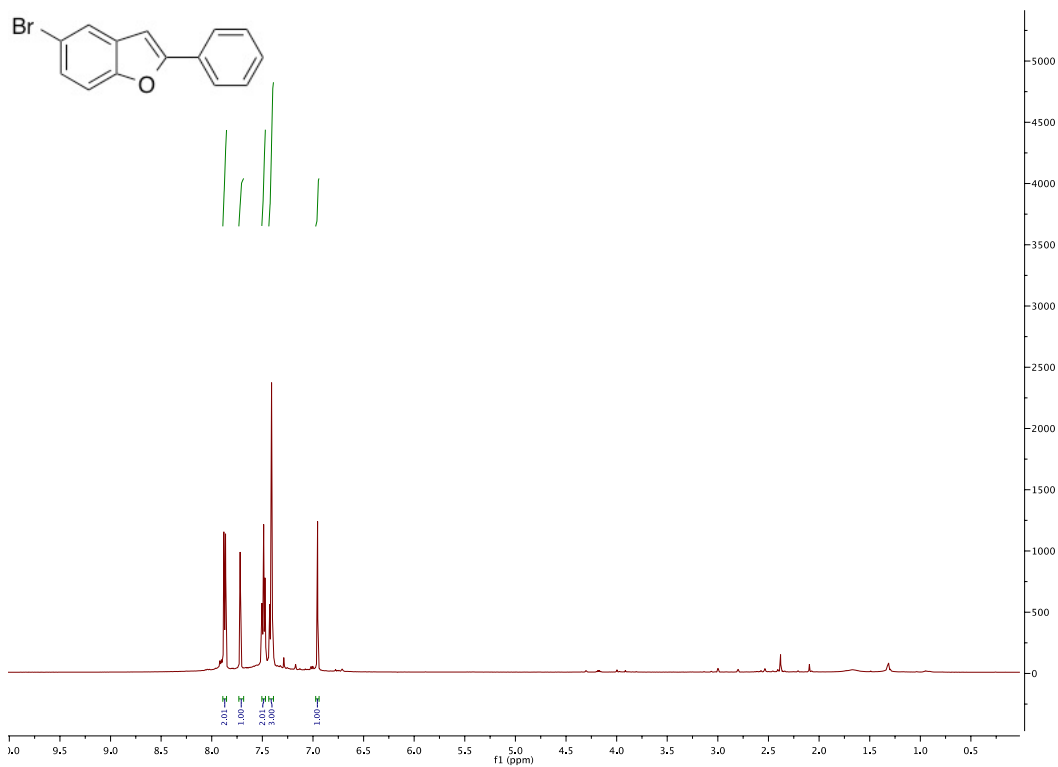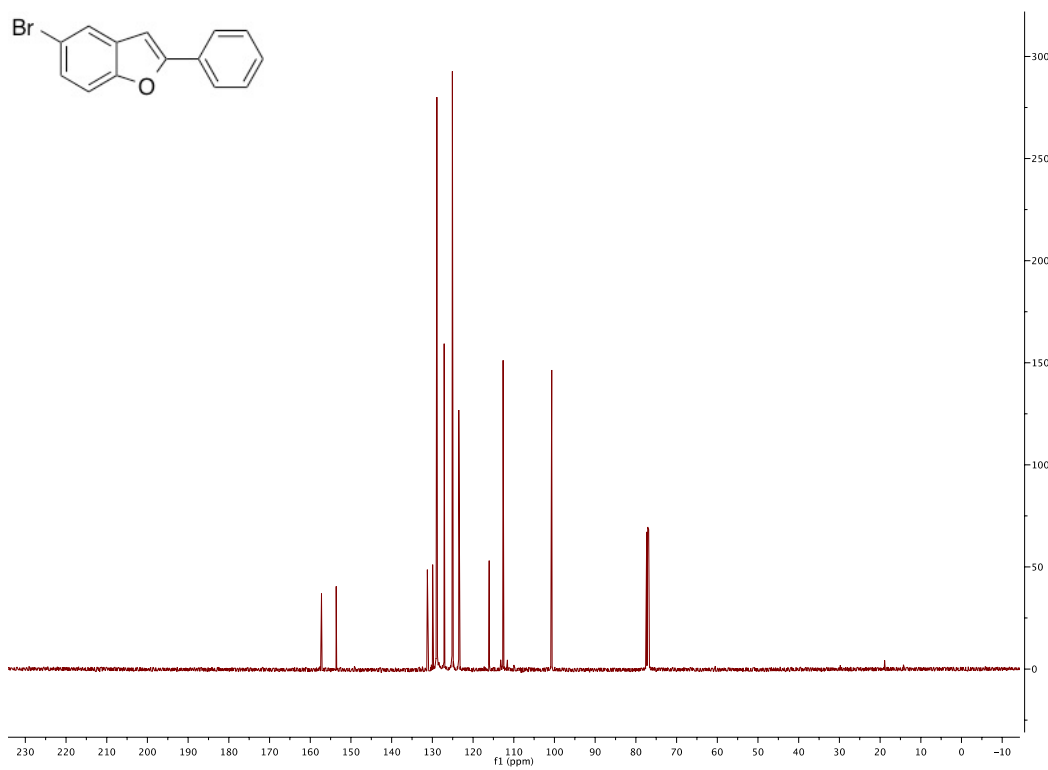

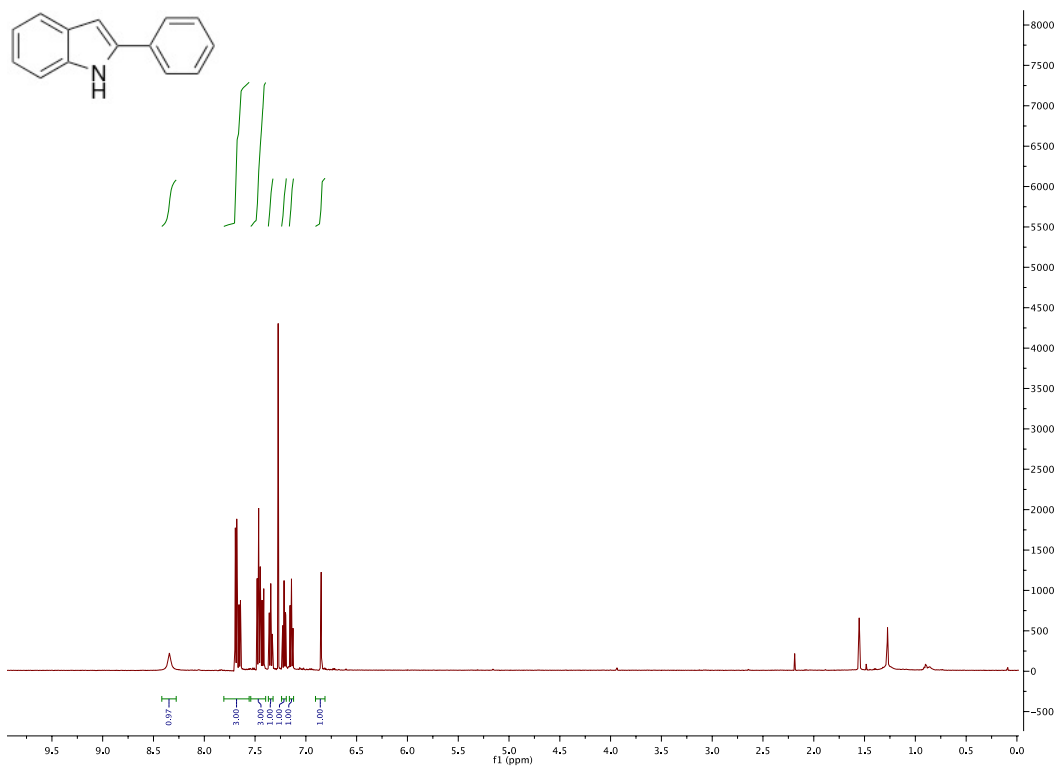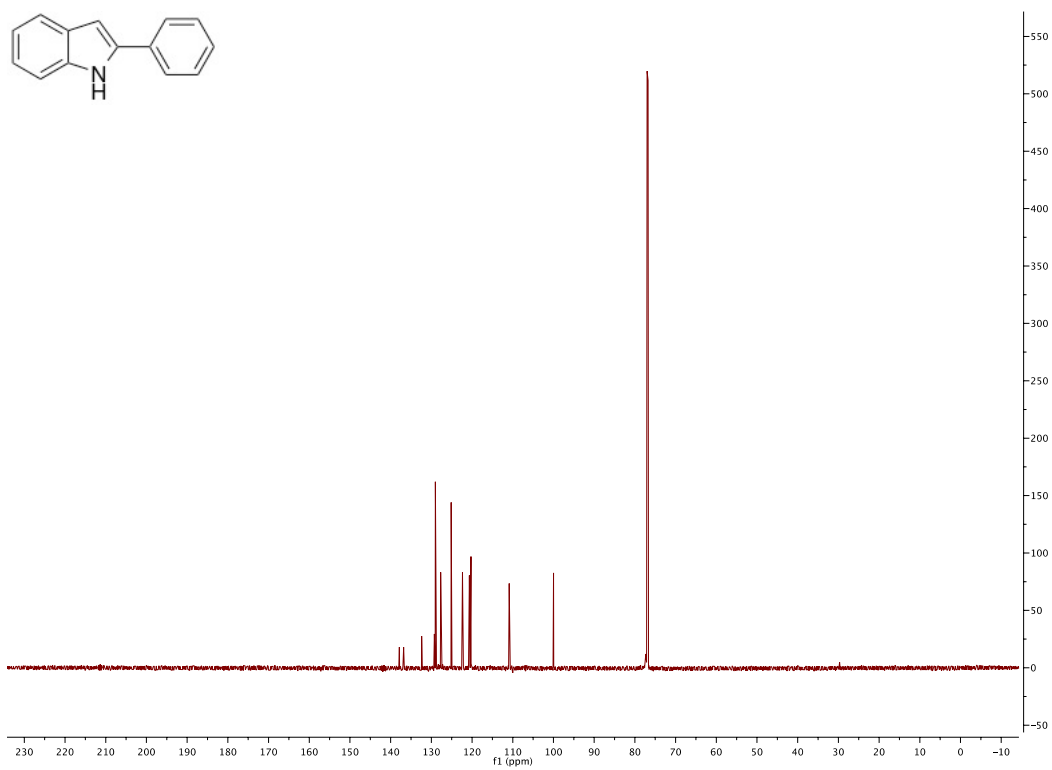

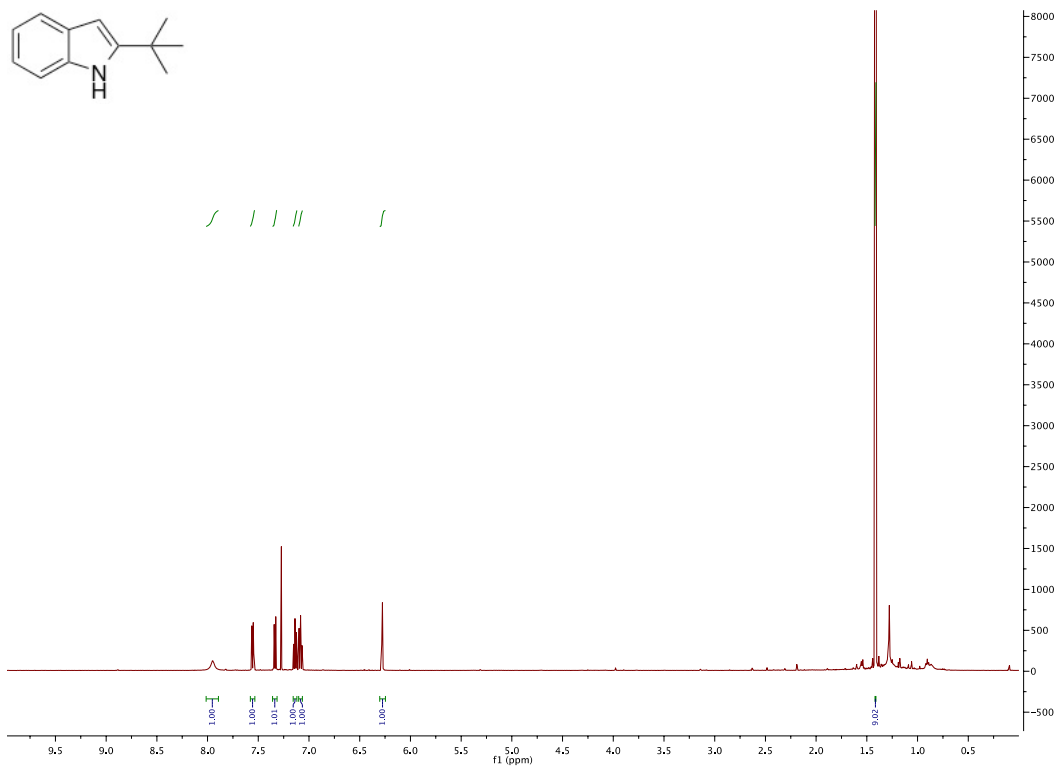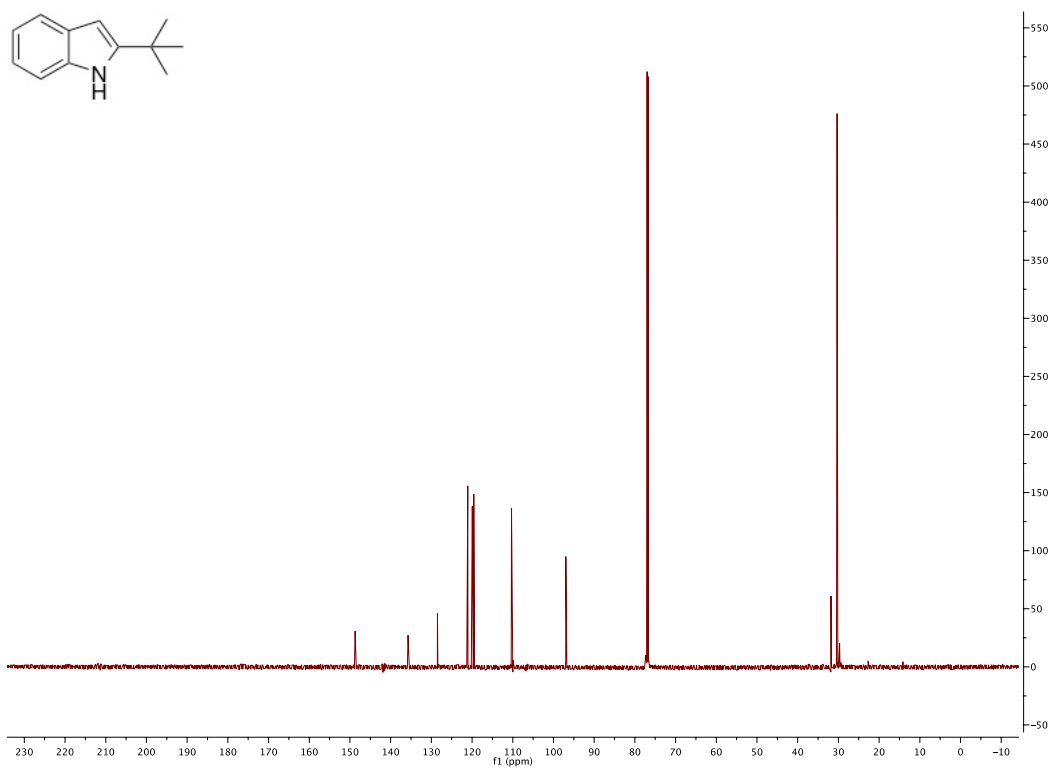

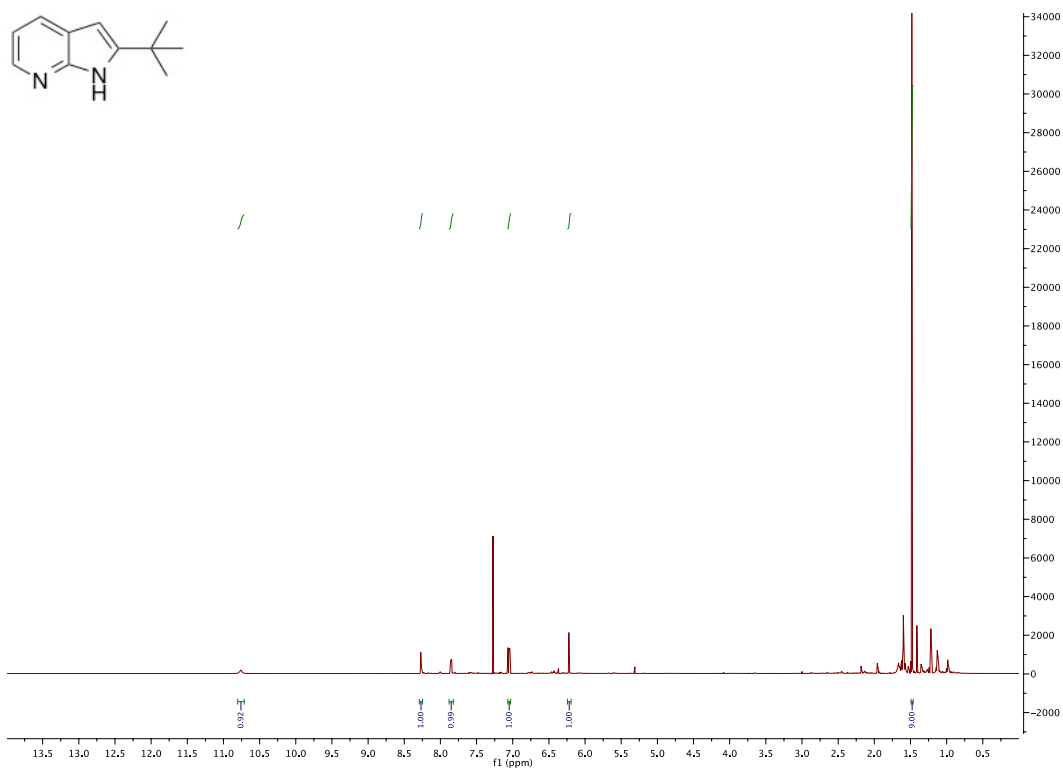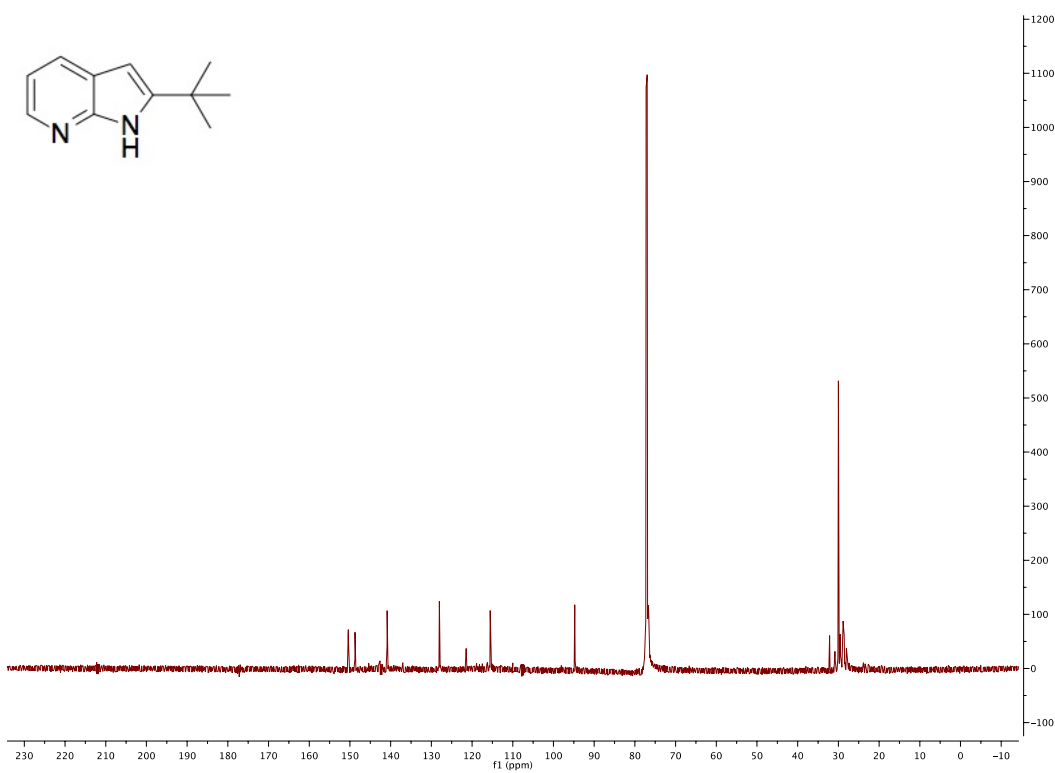

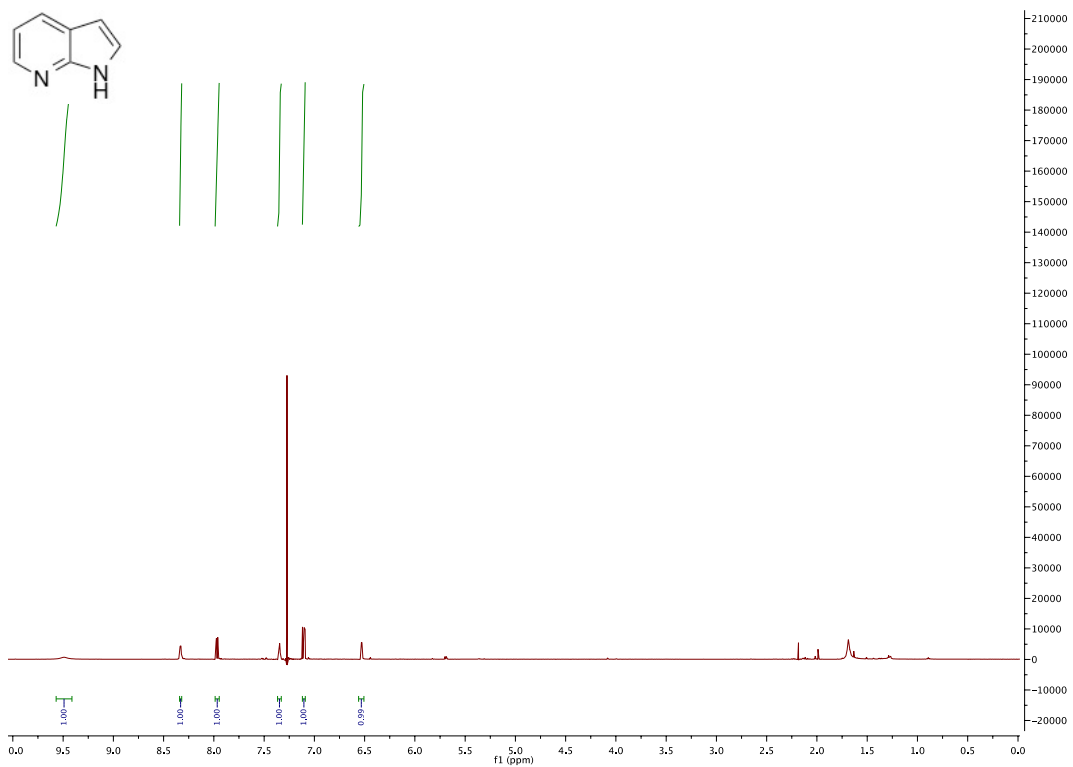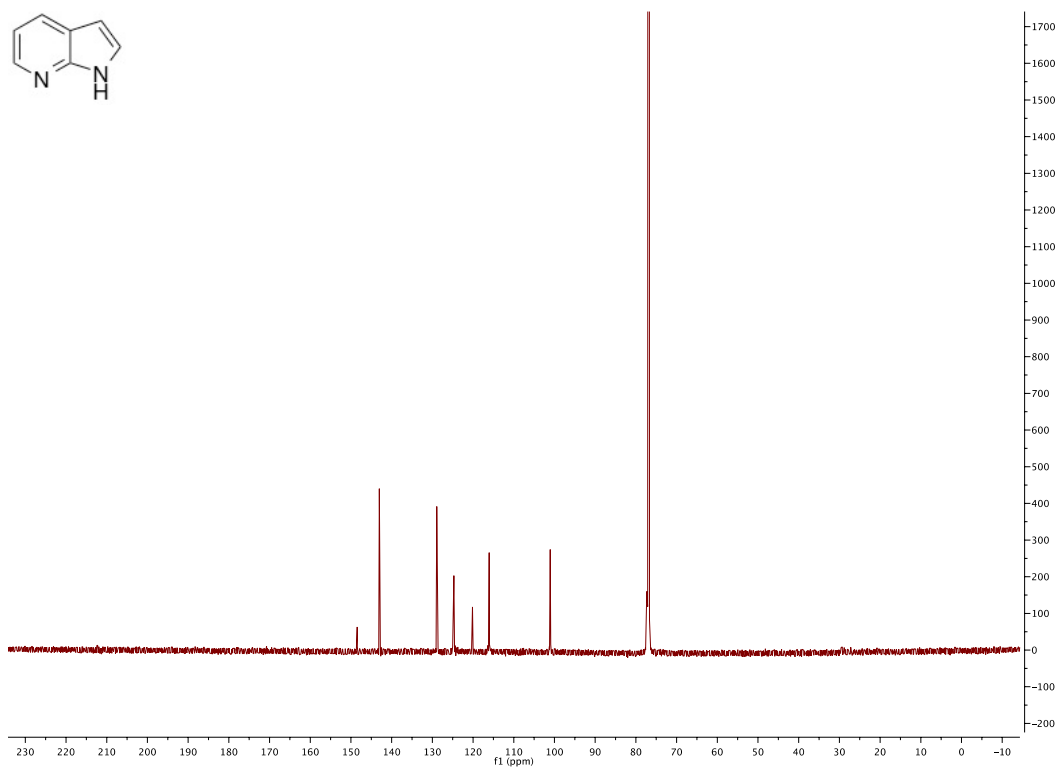

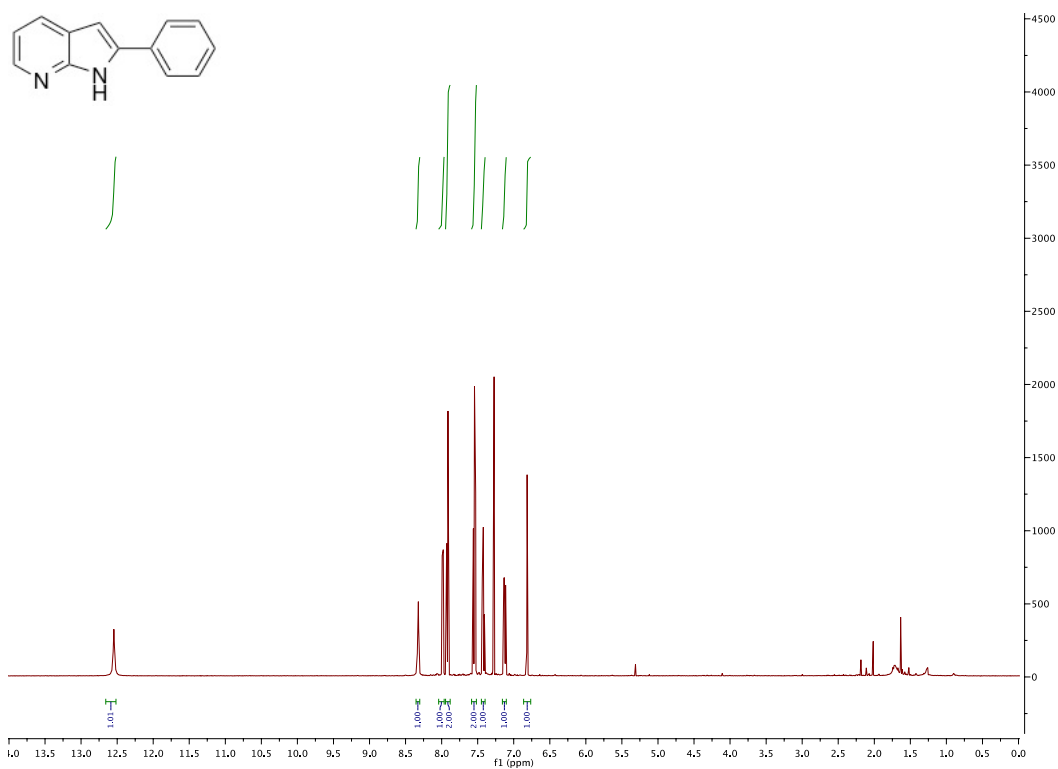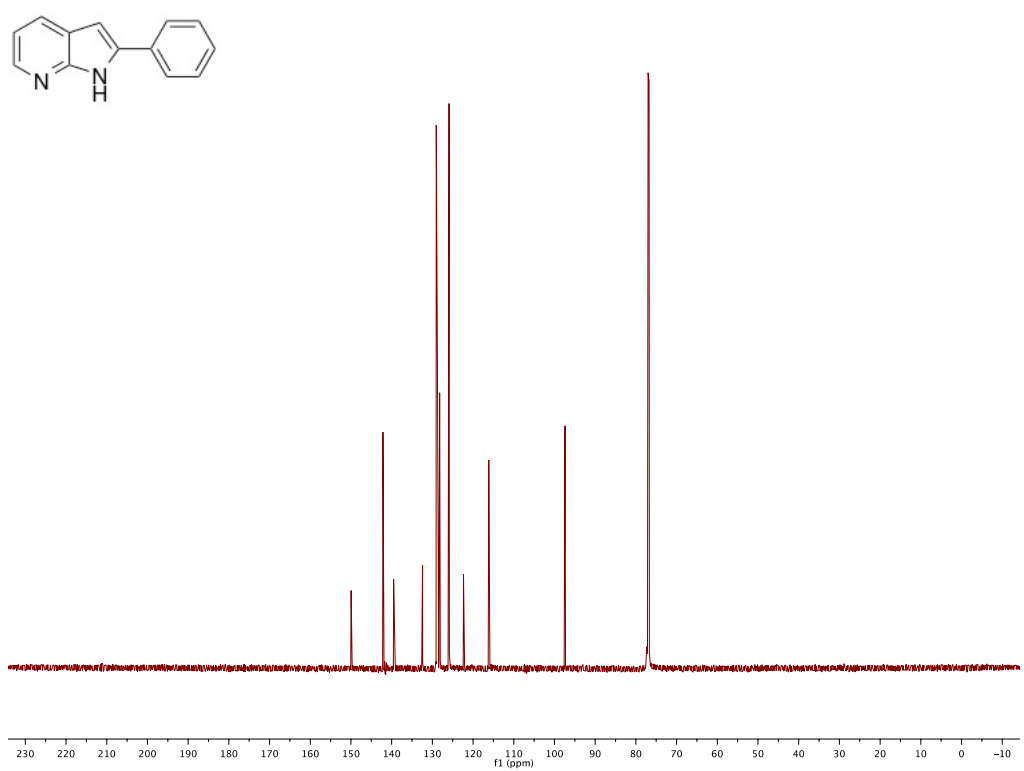

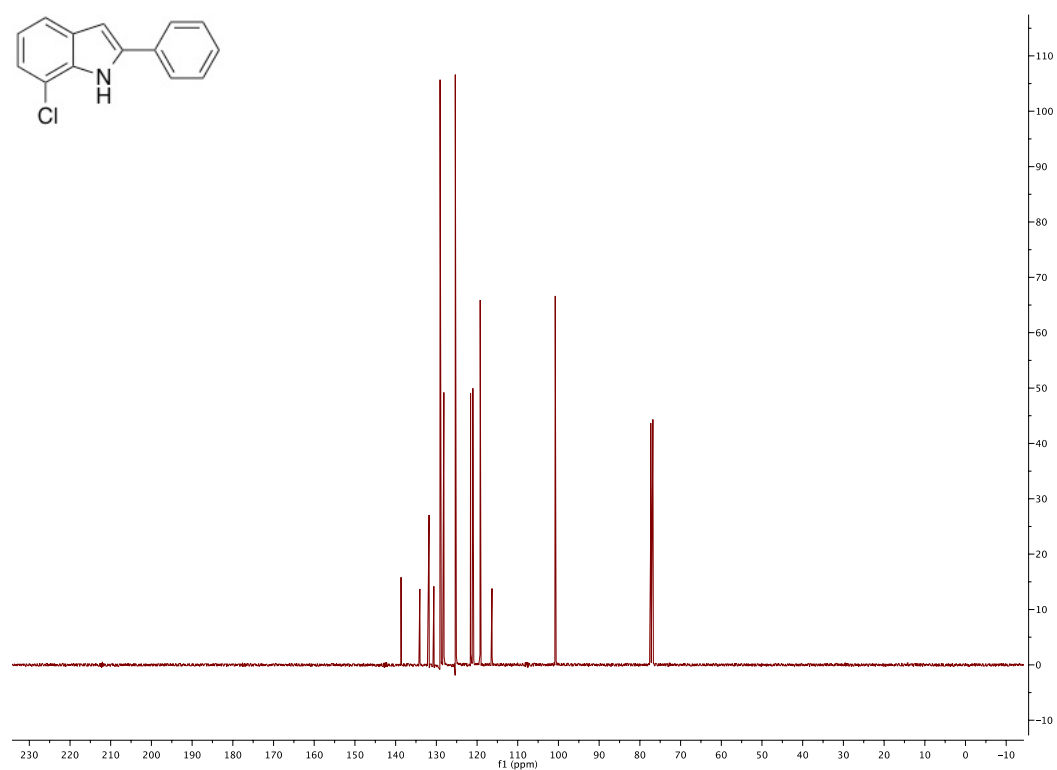

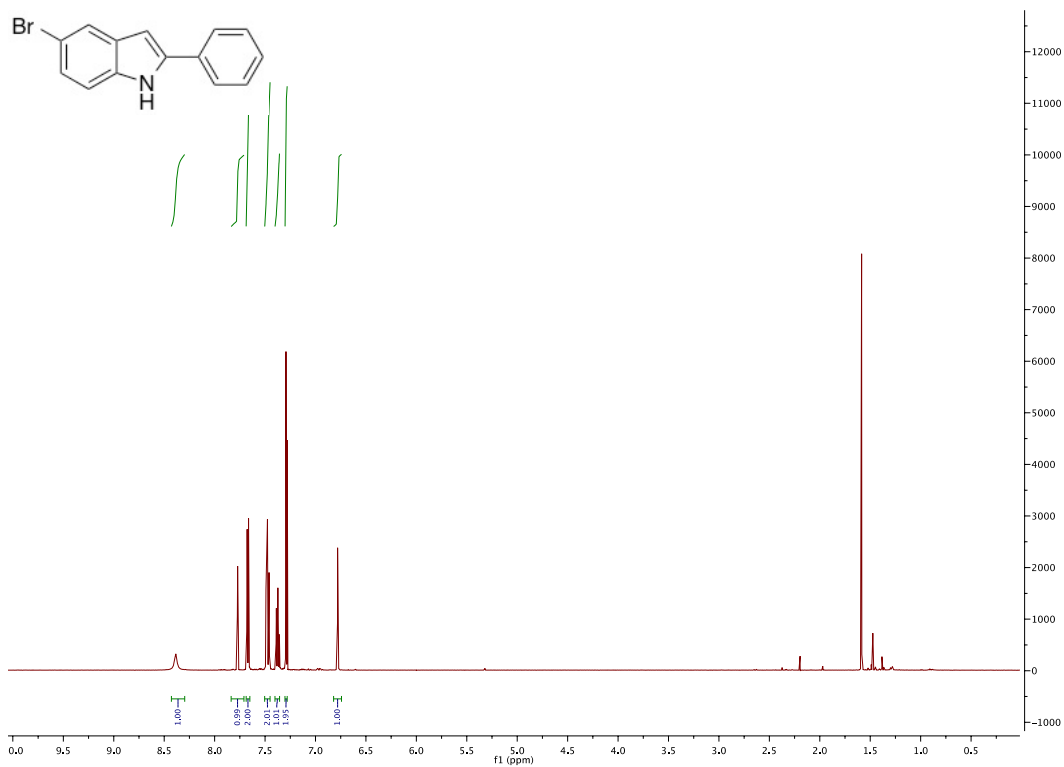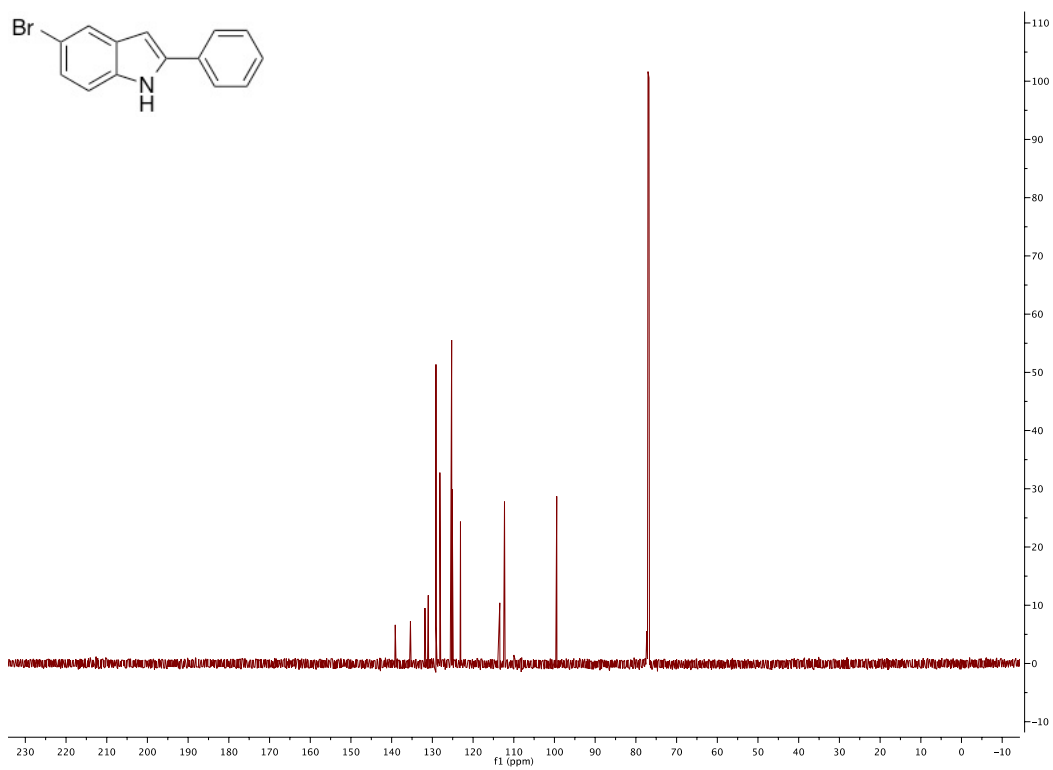



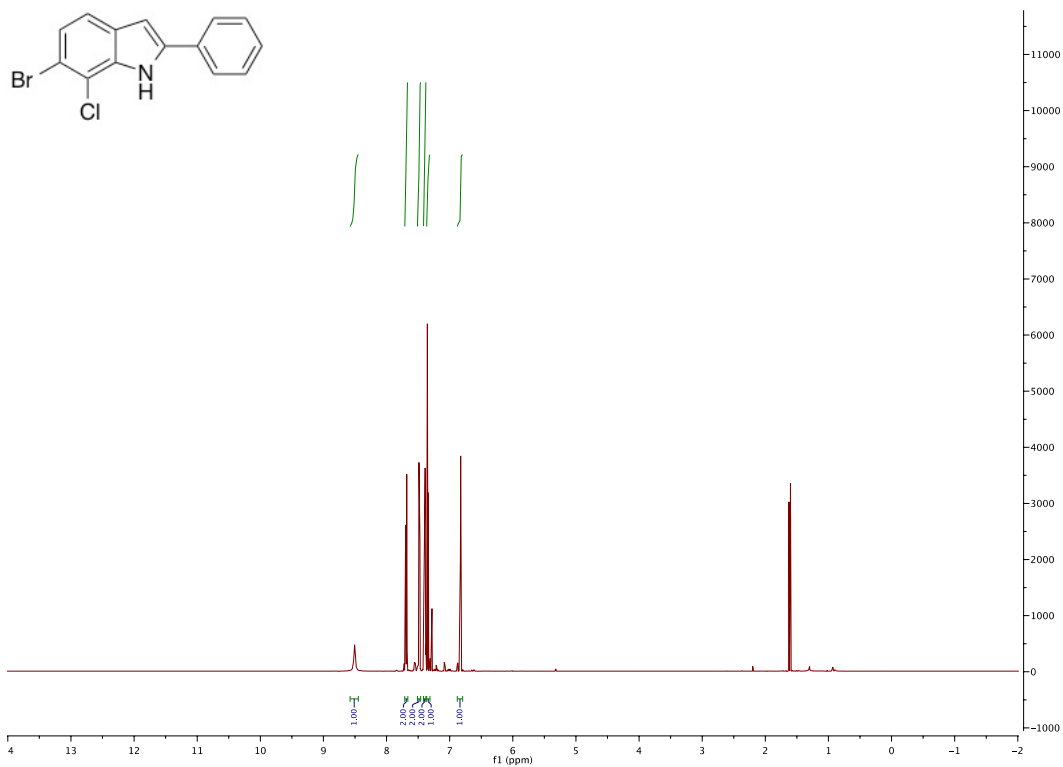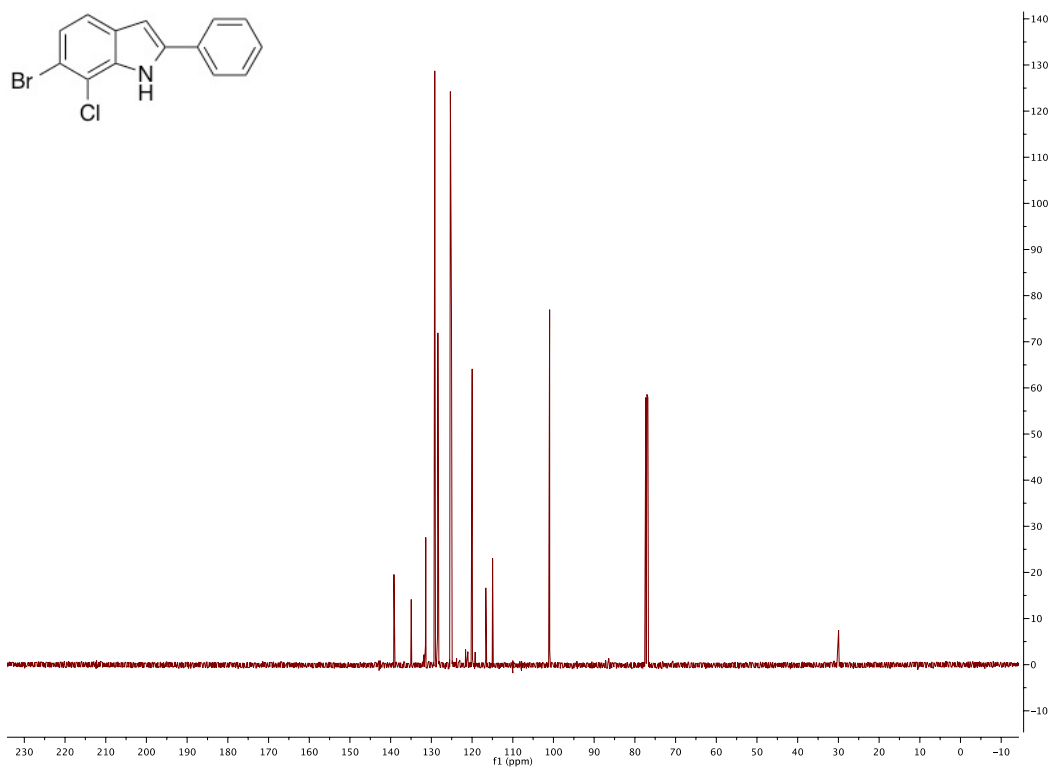

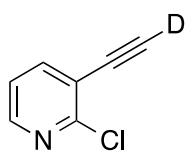

**1r-D**

$^1\text{H}$  NMR (500 MHz, DMSO- $\text{D}_6$ ):  $\delta$  8.44-8.41 (dd,  $J = 5.0$  Hz, 2.0 Hz, 1H), 8.08-8.05 (dd,  $J = 7.5$  Hz, 2.0 Hz, 1H), 7.48-7.44 (dd,  $J = 8.0$  Hz, 4.5 Hz, 1H).

The relevant portion of the deuterated spectrum appears above that of the non-deuterated spectrum. The terminal acetylene peak is circled to indicate the level of deuteration. No residual  $^1\text{H}$  peak could be detected in the deuterated compound.

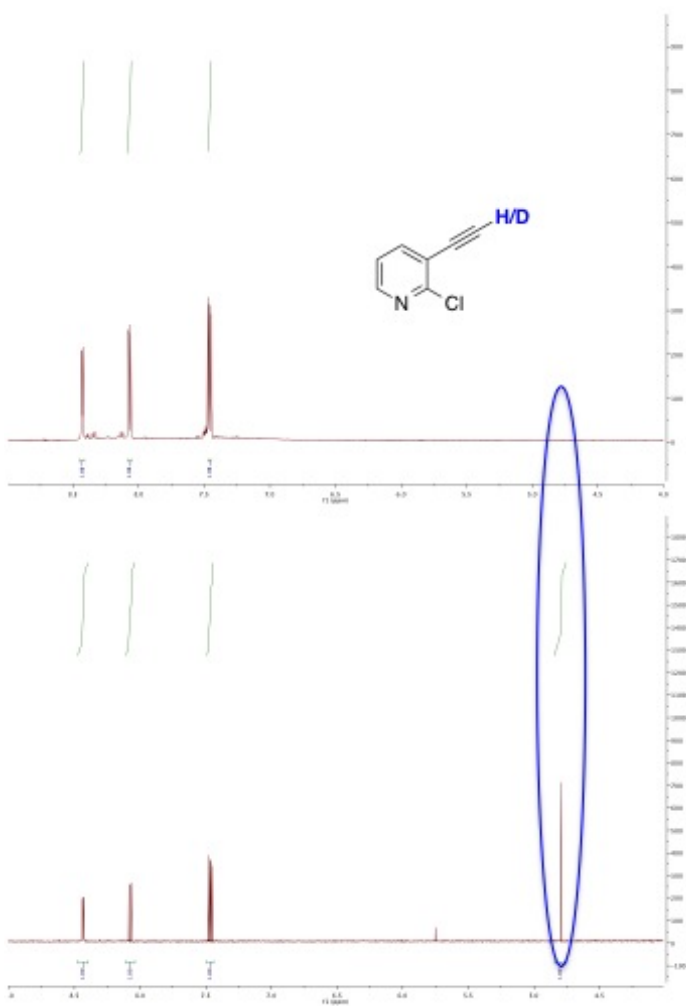

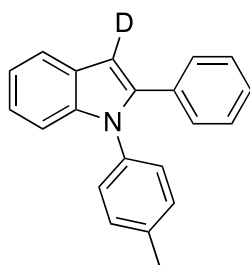

## 2a-D

$^1\text{H}$  NMR (500 MHz,  $\text{CDCl}_3$ ):  $\delta$  7.79-7.75 (m, 1H), 7.40-7.15 (m, 12H), 6.89 (s, 0.05H), 2.43 (s, 3H).

The relevant portion of the deuterated spectrum appears above that of the non-deuterated spectrum. The C2 proton peak is circled to indicate the level of deuteration. The residual  $^1\text{H}$  peak at the C2 position integrates to 5% intensity relative to the other peaks.

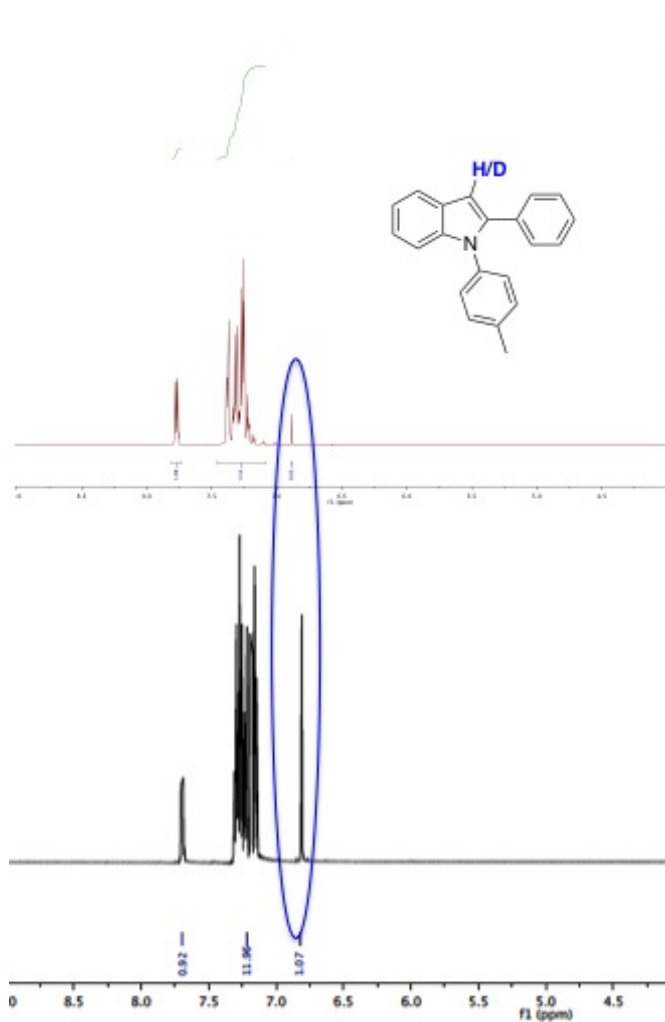

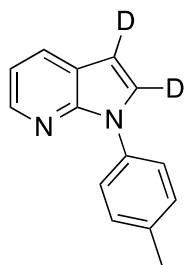

## 2k-D<sub>2</sub>

<sup>1</sup>H NMR (500 MHz, CDCl<sub>3</sub>):  $\delta$  8.39-8.36 (d,  $J$  = 4.5 Hz, 1H), 7.99-7.96 (d,  $J$  = 9 Hz), 7.64-7.61 (d,  $J$  = 8 Hz, 2H), 7.51-7.48 (d,  $J$  = 3.5 Hz, 0.03H), 7.35-7.32 (d,  $J$  = 8.5 Hz, 2H), 7.15-7.11 (ddd,  $J$  = 8.0 Hz, 4.5 Hz, 0.7 Hz, 1H), 6.63-6.61 (dd, 3.8 Hz, 0.7 Hz, 0.03H), 2.43 (s, 3H).

The relevant portion of the deuterated spectrum appears above that of the non-deuterated spectrum. The C1 and C2 proton peaks are circled to indicate the level of deuteration. The residual <sup>1</sup>H peaks at the C1 and C2 positions both integrate to 3% intensity relative to the other peaks.

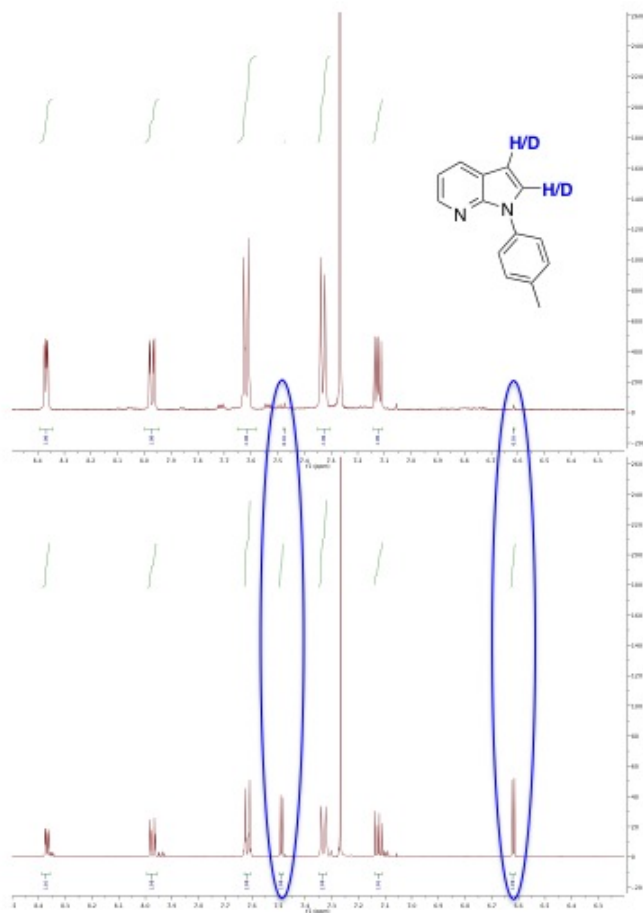

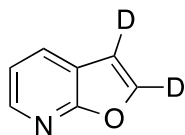

**3e-D<sub>2</sub>**

<sup>1</sup>H NMR (500 MHz, CDCl<sub>3</sub>):  $\delta$  8.37-8.34 (dd,  $J$  = 5.0 Hz, 1.5 Hz, 1H), 7.98-7.94 (dd,  $J$  = 8.0 Hz, 2.0 Hz, 1H), 7.73 (s, 0.05H), 7.27-7.23 (dd,  $J$  = 8.0 Hz, 4.5 Hz, 1H), 6.79 (s, 0.05H).

The relevant portion of the deuterated spectrum appears above that of the non-deuterated spectrum. The C1 and C2 proton peaks are circled to indicate the level of deuteration. The residual <sup>1</sup>H peaks at the C1 and C2 positions both integrate to 5% intensity relative to the other peaks.

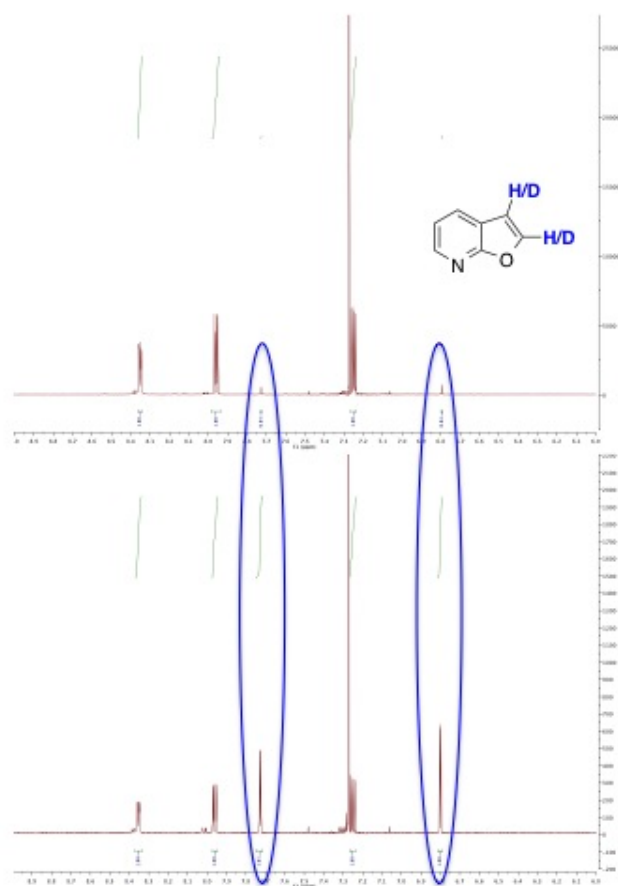

## Reagent sourcing, purity and aftermarket purification

All reagents and materials were purchased from the following suppliers with the indicated purity, and used as received unless otherwise specified:

phenylacetylene (Acros Organics, 98%), 2-ethynyltoluene (Sigma Aldrich, 97%), 3-ethynyltoluene (Sigma Aldrich, 97%), 4-ethynyltoluene (Sigma Aldrich, 97%), 4-*tert*-butylphenylacetylene (Sigma Aldrich, 96%), 4-Ethynyl- $\alpha,\alpha,\alpha$ -trifluorotoluene (Sigma Aldrich, 97%), 3-Ethynylpyridine (Sigma Aldrich, 98%), 4-Ethynylbenzonitrile (Sigma Aldrich, 97%), 3,3-dimethyl-1-butyne (TCI, 96%), trimethylsilylacetylene (Acros Organics, 98%), 4-Ethynylanisole (Sigma Aldrich, 97%), 2-Fluoroiodobenzene (Sigma Aldrich, 99%, contains copper as stabilizer), 2-fluoro-3-iodopyridine (Synthonix, 98%), 2-chloro-3-trimethylsilanylethynylpyridine (Sigma Aldrich), 1-chloro-2-fluoro-3-iodobenzene (Combi Blocks, 98%), 4-bromo-1-fluoro-2-iodobenzene (Combi Blocks, 98%), 4-bromo-3-chloro-1-fluoro-2-iodobenzene (Combi Blocks, 98%), copper (I) iodide (Strem Chemicals, 98%), bis(triphenylphosphine)palladium(II) dichloride (Sigma Aldrich,  $\geq 99.99\%$  trace metals basis), triethylamine (Fischer, reagent grade) – purified by distillation prior to use, tetrabutylammonium fluoride, 1.0 M in THF (TCI), p-toluidine (Acros Organics, 99%) – purified by sublimation prior to use sodium hydroxide (Fischer, reagent grade) – finely ground with mortar and pestle prior to use, acetamide (Sigma Aldrich, 99%) – purified by sublimation prior to use, dimethyl sulfoxide (Acros, extra dry with molecular sieves, water < 50 ppm), dimethyl sulfoxide-D6 (Cambridge Isotope, D, 99.9%), chloroform-D (Cambridge Isotope, D, 99.9%), dichloromethane (Pharmco-Aaper), hexanes (Pharmco-Aaper), methanol (Honeywell) ethyl acetate (Honeywell), sodium sulfate, anhydrous (Fischer, ACS grade), silica gel, premium rf (Sorbtech, porosity: 60Å, particle size: 200x400 mesh)

## Instrument specifications

All  $^1\text{H}$  and  $^{13}\text{C}$  NMR spectra were collected on a Varian 500 MHz NMR. HRMS data were obtained from an Agilent Technologies 6230 TOF LC/MS with an Ion Sense DART 100 ionization interface. All IR spectra were recorded on a Perkin Elmer FT-IR spectrum one instrument.

## Supporting Information references

1. N. P. Bizier, J. W. Wackerly, E. D. Braunstein, M. Zhang, S. T. Nodder, S. M. Carlin and J. L. Katz, *J. Org. Chem.*, 2013, **78**, 5987.
